# Supplementary material for: HOspitals and patients WoRking in Unity (HOW R U?): telephone peer support to improve older patients’ quality of life after emergency department discharge in Melbourne, Australia—a multicentre prospective feasibility study
Source: PubMed Central journal article supplement — BMJ Open. 2018 Jun 14;8(6):e020321. doi: 10.1136/bmjopen-2017-020321 (PMC6009511; doi:10.1136/bmjopen-2017-020321), 2018-06-14
Supplement: bmjopen-2017-020321.draft_revisions.pdf [file bmjopen-2017-020321.draft_revisions.pdf]

# BMJ Open

BMJ Open is committed to open peer review. As part of this commitment we make the peer review history of every article we publish publicly available.

When an article is published we post the peer reviewers' comments and the authors' responses online. We also post the versions of the paper that were used during peer review. These are the versions that the peer review comments apply to.

The versions of the paper that follow are the versions that were submitted during the peer review process. They are not the versions of record or the final published versions. They should not be cited or distributed as the published version of this manuscript.

BMJ Open is an open access journal and the full, final, typeset and author-corrected version of record of the manuscript is available on our site with no access controls, subscription charges or pay-per-view fees (<http://bmjopen.bmj.com>).

If you have any questions on BMJ Open's open peer review process please email [info.bmjopen@bmj.com](mailto:info.bmjopen@bmj.com)

# BMJ Open

## Hospitals and patients Working in Unity (HOW R U?): telephone peer support to improve older patients' quality of life after emergency department discharge – a feasibility study

|                                 |                                                                                                                                                                                                                                                                                                                                                                                                                                                                                                                                                                                                                                                                                                                                                                                                                                                   |
|---------------------------------|---------------------------------------------------------------------------------------------------------------------------------------------------------------------------------------------------------------------------------------------------------------------------------------------------------------------------------------------------------------------------------------------------------------------------------------------------------------------------------------------------------------------------------------------------------------------------------------------------------------------------------------------------------------------------------------------------------------------------------------------------------------------------------------------------------------------------------------------------|
| Journal:                        | <i>BMJ Open</i>                                                                                                                                                                                                                                                                                                                                                                                                                                                                                                                                                                                                                                                                                                                                                                                                                                   |
| Manuscript ID                   | bmjopen-2017-020321                                                                                                                                                                                                                                                                                                                                                                                                                                                                                                                                                                                                                                                                                                                                                                                                                               |
| Article Type:                   | Research                                                                                                                                                                                                                                                                                                                                                                                                                                                                                                                                                                                                                                                                                                                                                                                                                                          |
| Date Submitted by the Author:   | 31-Oct-2017                                                                                                                                                                                                                                                                                                                                                                                                                                                                                                                                                                                                                                                                                                                                                                                                                                       |
| Complete List of Authors:       | Lowthian, Judy; Monash University, School of Public Health & Preventive Medicine<br>Lennox, Alyse; Monash University, School of Public Health & Preventive Medicine<br>Curtis, Andrea; Monash University, School of Public Health & Preventive Medicine<br>Wilson, Gillian; Alfred Health, Volunteer Services<br>Rosewarne, Cate; Cabrini Hospital, Volunteer Services<br>Smit, De Villiers; Alfred Health, Emergency & Trauma Centre<br>O'Brien, Debra; Epworth, Medical Services<br>Browning, Colette; Monash University, School of Primary Health Care<br>Boyd, Lee; Cabrini Hospital, Nursing Services & Cabrini Institute<br>Smith, Cathie; Alfred Health, Emergency & Trauma Centre<br>Cameron, Peter; Monash University, Department of Epidemiology and Preventive Medicine<br>Dale, Jeremy; University of Warwick, Warwick Medical School |
| <b>Primary Subject Heading</b>: | Health services research                                                                                                                                                                                                                                                                                                                                                                                                                                                                                                                                                                                                                                                                                                                                                                                                                          |
| Secondary Subject Heading:      | Geriatric medicine, Emergency medicine, Patient-centred medicine                                                                                                                                                                                                                                                                                                                                                                                                                                                                                                                                                                                                                                                                                                                                                                                  |
| Keywords:                       | post-discharge, gerontology, social isolation, volunteer-peer, telephone-support                                                                                                                                                                                                                                                                                                                                                                                                                                                                                                                                                                                                                                                                                                                                                                  |
|                                 |                                                                                                                                                                                                                                                                                                                                                                                                                                                                                                                                                                                                                                                                                                                                                                                                                                                   |

SCHOLARONE™  
Manuscripts

## TITLE PAGE

**HOspitals and patients WoRking in Unity (*HOW R U?*): telephone peer support to improve older patients' quality of life after emergency department discharge – a feasibility study**

1. **Dr Judy A Lowthian**                      **Corresponding Author**  
School of Public Health and Preventive Medicine, Monash University  
Level 3, 553 St Kilda Road, Melbourne, 3004, Australia  
[Judy.Lowthian@monash.edu](mailto:Judy.Lowthian@monash.edu)  
T: +61 412 116571  
  
Bolton Clarke Research Institute, Bolton Clarke,  
31 Alma Road, St Kilda, 3182, Australia  
[jlowthian@boltonclarke.com.au](mailto:jlowthian@boltonclarke.com.au)  
T: +61 412 116571
2. Ms Alyse Lennox  
School of Public Health and Preventive Medicine, Monash University  
Level 3, 553 St Kilda Rd, Melbourne, 3004, Australia  
[Alyse.Lennox@monash.edu](mailto:Alyse.Lennox@monash.edu)  
T: +61 3 9903 0320
3. Dr Andrea Curtis  
School of Public Health and Preventive Medicine, Monash University  
Level 6 Alfred Centre, 99 Commercial Road, Melbourne, 3004, Australia  
[Andrea.Curtis@monash.edu](mailto:Andrea.Curtis@monash.edu)  
T: +61 3 9903 0171
4. Mrs Gillian Wilson  
Volunteer Services, Alfred Health,  
55 Commercial Road, Melbourne, 3004, Australia  
[G.Wilson@alfred.org.au](mailto:G.Wilson@alfred.org.au)  
T: +61 3 9076 2970
5. Mrs Cate Rosewarne  
Volunteer Services, Cabrini Health,  
183 Wattletree Road, Malvern, Australia  
[crosewarne@cabrini.com.au](mailto:crosewarne@cabrini.com.au)  
T: +61 3 9508 3470

- 1  
2  
3  
4 6. Dr De Villiers Smit  
5 Emergency and Trauma Centre, Alfred Health,  
6 55 Commercial Road, Melbourne, 3004, Australia  
7 Melbourne, Australia  
8 [d.smit@alfred.org.au](mailto:d.smit@alfred.org.au)  
9 T: +61 3 9076 2782  
10  
11
- 12 7. Dr Debra O'Brien  
13 Epworth Hospital,  
14 89 Bridge Road, Richmond, Australia  
15 [debra.obrien@epworth.org.au](mailto:debra.obrien@epworth.org.au)  
16 T: +61 3 9426 6666  
17  
18
- 19 8. Professor Colette Browning  
20 Shenzhen International Institute for Primary Health Care Research, Shenzhen,  
21 China  
22  
23 Australian National University, Canberra Australia  
24  
25 Monash University, Wellington Road, Melbourne, Australia  
26 [colette.browning@monash.edu](mailto:colette.browning@monash.edu)  
27 T: +61 448 708 090  
28  
29
- 30 9. Associate Professor Lee Boyd  
31 Nursing Services and Cabrini Institute, Cabrini Health,  
32 154 Wattletree Road, Malvern, Australia  
33 [lboyd@cabrini.com.au](mailto:lboyd@cabrini.com.au)  
34 T: +61 3 9508 3470  
35  
36
- 37 10. Ms Cathie Smith  
38 Senior Social Worker/ ED Allied Health Team Leader, Patient + Family Services  
39 Alfred Health,  
40 55 Commercial Road, Melbourne, Australia  
41 [Cathie.Smith@alfred.org.au](mailto:Cathie.Smith@alfred.org.au)  
42 T: +61 3 9076 3405  
43  
44
- 45 11. Professor Peter Cameron  
46 School of Public Health and Preventive Medicine, Monash University  
47 Level 3, 553 St Kilda Rd, Melbourne, 3004, Australia  
48  
49 Emergency and Trauma Centre, Alfred Health,  
50 55 Commercial Road, Melbourne, Australia  
51 [Peter.Cameron@monash.edu](mailto:Peter.Cameron@monash.edu)  
52 T: +61 455 753 792  
53  
54
- 55 12. Professor Jeremy Dale  
56  
57  
58  
59  
60

Warwick Medical School, University of Warwick,  
Coventry, CV4 7AL, United Kingdom  
[Jeremy.Dale@warwick.ac.uk](mailto:Jeremy.Dale@warwick.ac.uk)  
T: 024 7652 2891

## Keywords

- gerontology
- social isolation
- volunteer-peer
- telephone-support

## Author Contributions:

JL conceived, developed the study protocol, and obtained funding for the study. JD and CB provided expertise to help design of the intervention. JL, AL, AC, GW, CR, DS, DO, LB, CS, PC, JD and CB contributed to refinement of the study protocol. JL, AL, AC, GW, CR, DS, DO, LB, CS, PC, JD and CB contributed to the acquisition, analysis, or interpretation of data. JL drafted the manuscript. JL, AL, AC, GW, CR, DS, DO, LB, CS, PC, JD and CB helped review and revise it critically for intellectual content, and approved the final version to be published. JL, AL, AC, GW, CR, DS, DO, LB, CS, PC, JD and CB agree to be accountable for all aspects of the work in ensuring that questions related to the accuracy or integrity of any part of the work are appropriately investigated and resolved.

**Funding:** This work was supported by a grant from the Monash Partners Academic Health Science Centre.

**Competing interests:** None declared.

**Patient consent:** Obtained.

**Ethics approval:** Alfred Health (432/15), Cabrini Health (12-09-11-15) and Monash University (CF15/4468-2015001934)

**Provenance and peer review:** Not commissioned; externally peer reviewed.

**Data sharing Statement:** There are no additional unpublished data for this study.

**Word Count:** 1938 words

1  
2  
3 **HOspitals and patients WoRking in Unity (*HOW R U?*): telephone peer support**  
4 **to improve older patients' quality of life after emergency department**  
5 **discharge – a feasibility study**  
6

7 **Abstract**  
8

9 **Objectives:** To ascertain the feasibility and acceptability of the *HOW R U?* program,  
10 a novel volunteer-peer post-discharge support program for older patients after  
11 discharge from the emergency department (ED).  
12

13  
14 **Design:** A multicentre prospective mixed methods feasibility study.  
15

16 **Setting:** Two tertiary hospital EDs in metropolitan Melbourne, Australia.  
17

18 **Participants:** A convenience sample of 39 discharged ED patients aged 70 years or  
19 over, with symptoms of social isolation, loneliness and/or depression.  
20

21 **Intervention:** The *HOW R U?* intervention comprised weekly social support  
22 telephone calls delivered by volunteer peers for 3 months following ED discharge.  
23  
24

25 **Primary and secondary outcome measures:** The primary outcomes were  
26 feasibility of study processes, intervention acceptability to participants, and retention  
27 in the program. Secondary outcomes were changes in loneliness level (UCLA-3 item  
28 Loneliness Scale), mood (GDS-5 item) and health-related quality of life (EQ-5D-5L  
29 and EQ-VAS) post-intervention.  
30  
31

32 **Results:** Recruitment was feasible, with 30% of eligible patients successfully  
33 recruited. Seventeen volunteer peers provided telephone support to patient  
34 participants, in addition to their usual hospital volunteer role. *HOW R U?* was well  
35 received, with 87% retention in the patient group, and no attrition in the volunteer  
36 group.  
37  
38

39 The median age of patients was 84 years, 64% were female, and 82% lived alone.  
40 Sixty-eight percent of patients experienced reductions in depressive symptoms, and  
41 53% experiencing reduced feelings of loneliness, and these differences were  
42 statistically significant. Patient feedback was positive and volunteers reported great  
43 satisfaction with their new role.  
44  
45

46 **Conclusion:** *HOW R U?* was feasible in terms of recruitment and retention and was  
47 acceptable to both patients and volunteers. The overall results support the potential  
48 for further research in this area, and provide data to support the design of a definitive  
49 trial to confirm the observed effects.  
50  
51

52 **Trial registration:** <http://www.anzctr.org.au> ACTRN12615000715572  
53  
54  
55  
56  
57  
58  
59  
60

### Strengths and limitations of this study

- This is the first feasibility study of a hospital volunteer-delivered telephone service to support older people with symptoms of social isolation, loneliness and/or depression after discharge from the emergency department.
- Recruitment and retention rates support the feasibility of the intervention.
- Reductions in loneliness and depressive symptoms support further research to test the intervention in a definitive trial.
- This was a relatively small cohort study, hence a randomised controlled trial is required to confirm the observed effects.

## INTRODUCTION

Older people presenting to Emergency Departments (EDs) and hospitals have a higher likelihood of social isolation, loneliness and depression [1-3]; all of which are associated with negative health outcomes, functional decline, institutionalisation, mortality and increased hospital use.[4-9]

These risk factors for increased hospital use and poor health outcomes are not routinely screened for during ED attendances or short hospital admissions other than in the research setting. Despite this, ED attendances represent an opportunity to identify older patients who are at risk of further negative health outcomes and increased acute health service use. Targeted management of older people suffering from social isolation, loneliness or depressive symptoms has been shown to be effective in reducing symptoms.[5] It is highly probable that systematic identification of isolation, loneliness and depressive symptoms at the time of ED attendance, with post-discharge support, will help combat these negative consequences and diminish this important public and individual health burden.

Peer support is the '*provision of knowledge, experience, emotional or practical help by someone sharing common characteristics*'<sup>41</sup>. Peer support can be used with patients transitioning from hospital to home to enhance quality of life. This definition falls within the social support model, and postulates that social relationships promote health and well-being; thus peer support is hypothesised to reduce feelings of social isolation and loneliness, thereby improving well-being [10] .

Peer support is provided by a person sharing common characteristics (e.g. age, gender, socio-economic status, ethnicity, or experience of acute illness and hospitalisation). Equivalent 'status' between peer and patient is a feature of peer support that facilitates a high level of empathy delivered in a non-confrontational manner [11]. Peers may be hospital volunteers who are trained to support and listen, but not to give medical advice or judgement. This non-medical status helps overcome any reluctance that patients may have in discussing feelings of loneliness

1  
2  
3 or isolation; thus helping to bridge the gap between patients and health professionals  
4 [12, 13]. Peer support can be delivered via home visits, group meetings or telephone  
5 calls.  
6

7 The aim of this study was to test the feasibility and acceptability of *HOspitals and*  
8 *patients WoRking in Unity (HOW R U?)*, a post-discharge, telephone peer support  
9 intervention delivered by hospital volunteers to older community-dwelling patients  
10 with feelings of social isolation, loneliness, or depression.  
11

## 12 **METHODS**

### 13 **Design, setting and participants**

14  
15 This was a pragmatic prospective mixed methods feasibility study conducted with a  
16 cohort of patients following discharge home from the EDs of two tertiary hospitals.  
17 The Alfred and Cabrini Hospitals provide public and private healthcare in  
18 metropolitan Melbourne, respectively. Participants were community-dwelling patients  
19 aged 70 years or more, who attended The Alfred ED between November 2015 and  
20 March 2016; and Cabrini ED between March and July 2016. Patients were recruited  
21 on weekdays throughout the study period by research nurses. All participants gave  
22 written informed consent. The study was registered at <http://www.anzctr.org.au>,  
23 registry number ACTRN12615000715572.  
24  
25

26 Eligible patients had symptoms of social isolation, loneliness and/or depression  
27 using the Social Isolation Index (SII $\geq$ 3), [14] 3-item Loneliness Scale (UCLA-3 $\geq$ 6),  
28 [15] and Geriatric Depression Scale – 5 item (GDS-5 $\geq$ 2) [16].  
29

30 Patients were excluded if they were triaged as category 1 level of urgency on the  
31 Australasian Triage Scale; required surgery; lived in an aged care facility; were  
32 receiving end-of-life care; had a confirmed diagnosis of dementia or severe mental  
33 illness such as psychosis or schizophrenia; had a moderate-severe cognitive  
34 impairment using the Mini-Mental State Examination (MMSE $<$ 20); [17] or were  
35 unable or unwilling to communicate by telephone.  
36  
37

### 38 **Sample size**

39 A sample size of 50 participants across the two sites was nominated, to examine  
40 feasibility of study processes and intervention acceptability.  
41

### 42 **HOW R U? intervention**

43 The intervention, volunteer peer training program and risk management strategies  
44 were described in full in the study protocol. [18] In summary, *HOW R U?* comprised:  
45

- 46 • screening by nurses for feelings of social isolation, loneliness and depression  
47 at the time of hospital attendance;
- 48 • peer support delivered by a trained hospital volunteer through weekly  
49 telephone calls, within 72 hours of discharge home, for up to 3 months; and  
50



- referral for ongoing support by community-based services as required at study end.

## Data collection

Biosociodemographic and health and social care services use data were collected, alongside measurement of social isolation, loneliness, depressive symptoms and health-related quality of life at the time of hospital attendance and at the 3 months study end point.[18] Feasibility of study processes including recruitment and retention in the program were assessed using study records. Acceptability of the intervention was determined at conclusion of the peer support telephone intervention through in-depth semi-structured telephone interviews with patient participants; and through focus groups with volunteer peer participants. Fidelity of the intervention delivery was determined by reviewing the weekly telephone activity logs maintained by the volunteer peers, and also through observation of a proportion of peer support calls.

## Analysis

Acceptability of the intervention by the target patient population was measured by the rate of recruitment and retention in the intervention, and also through feedback interviews. Acceptability to volunteer peers was measured using retention rates and feedback obtained in focus groups. Interview and focus group data were audio-recorded and transcribed.

Social isolation, loneliness, depressive symptoms and health-related quality of life scores were compared before and after the intervention, using paired t-tests with a significance level of  $p=0.05$ .

## RESULTS

This study enabled us to develop all study resources, materials and training programs; test the feasibility of study processes; and determine acceptability of the intervention to patients and volunteers. We recruited 17 volunteer peers and 39 patient participants. Volunteers were all aged over 50 years and 69% were women. The median age of patient participants was 84 years, 64% were women, and 84% of participants lived alone.

### Feasibility of study processes

Volunteers were invited by their Hospital Volunteer Services Manager to participate in the study. All volunteer participants attended a half-day *HOW R U?* peer support training program, conducted at their respective hospital. Feedback about the first hospital's *HOW R U?* orientation / training program and resources enabled refinement prior to the second hospital's session.

Recruitment processes in the ED, including eligibility screening, were feasible, with 30% of eligible patients successfully enlisted across the two sites.

## Intervention acceptability and fidelity

The intervention was feasible and acceptable from the volunteers' point of view, with most able to take on 3 participants in addition to their usual hospital volunteer roles. There was no volunteer attrition over the study period. Weekly monitoring of telephone activity logs indicated intervention fidelity. Risk management procedures and levels of support were reported to be appropriate, with one volunteer reporting concerns about a single patient participant in accordance with the study protocol. The *HOW R U?* volunteers showed great satisfaction with this new role, commenting that *'it was (a) very rewarding (experience)'* (V8).

The intervention was acceptable to patient participants, with 34 completing the program, representing an 87% retention rate. According to the feedback, the telephone call regime and call format were reported to be appropriate:

- *'it is empowering have someone to talk to when you are down and know that you are not alone'*(P26)
- *'after discharge is when something like this is really helpful, especially if you're on your own'* (P5)
- *'felt that I could confide in my volunteer'*(P21)
- *'telephone calls are a good way to receive social support without having to go out'* (P9)
- *'my volunteer (peer) was supportive and understanding'*(P37)

## Secondary outcomes

At the end of the 3-months study, it was observed that:

- 53% of participants experienced a reduction in the level of loneliness:  
pre- and post- mean *UCLA 3-item* scores (standard deviation, SD) 5.76 (SD 1.84) and 4.59 (SD 1.62), respectively ( $t=3.32$ ,  $p=0.002$ );
- 68% of participants experienced fewer depressive symptoms:  
pre- and post- mean *GDS 5-item* scores 2.15 (SD 1.21) and 1.03 (SD,1.22), respectively ( $t=4.77$ ,  $p=0.000$ )
- while 59% of participants experienced an increase in health-related quality of life, the difference between mean *EQ VAS* scores pre- and post- intervention was not significant:  
pre- and post- mean *EQ VAS* scores 57.85 (SD 26.02) and 65.44 (SD=20.13), respectively ( $t=-1.58$ ,  $p=0.124$ )

## Discussion

This study indicated that *HOW R U?* was feasible and acceptable to patients and volunteers. Our results also suggested that a hospital volunteer-delivered telephone service might reduce levels of loneliness and symptoms of depression in older patients after hospital discharge; hence further research with a comparative controlled trial is warranted.

1  
2  
3 The overall 30% recruitment rate was reassuring, given the challenges associated  
4 with acute illness or injury and the fast-paced nature of the ED environment; [19] as  
5 well as the recognised stigma with seeking or receiving support in older populations.  
6 [20] Recruitment sessions were limited to 4 hour time periods, due to resource  
7 constraints for this feasibility study. The target of 25 patients was met at the Alfred,  
8 however recruitment was terminated early at Cabrini due to the majority of older  
9 patients being admitted for time periods greater than 72 hours.

10  
11  
12 The rate of patient retention in *HOW R U?* was promising, possibly in part due to the  
13 targeted cohort's characteristics, the supportive non-intrusive nature of the  
14 intervention which enabled relative anonymity and increased privacy over the phone,  
15 [21] and commencement within 72 hours of discharge.

16  
17  
18 The positive feedback was encouraging, and is in common with that reported by the  
19 UK *Call in Time* telephone 'befriending' service for older people. Evaluation of this  
20 service indicated a major impact on quality of life, with participants reporting that they  
21 felt a sense of belonging, that life was worth living and they valued knowing that  
22 '*there's a friend out there*'. [22] This resonates with comments received from *HOW R*  
23 *U?* participants.

24  
25  
26 Social isolation, loneliness and depressed mood are prevalent amongst older people  
27 living in the community, with 12% feeling socially isolated; [23] 50% reporting  
28 loneliness; [24, 25] and depressive feelings in up to 20%. [26] Self-reported rates  
29 probably *under-represent* true levels because of an associated stigma amongst  
30 older people. [26] Therefore older patients with loneliness or depressive feelings  
31 are highly likely not to be identified, [27] reducing the opportunity for appropriate  
32 support to be implemented in the community.

33  
34  
35 Older people presenting to ED are at an increased risk of feeling socially isolated,  
36 lonely or depressed, [28] which are associated with increased re-attendance [29] and  
37 negative health outcomes such as early mortality, suicide, dementia and stroke. [30]  
38 These consequences have far-reaching public health impacts in terms of reduced  
39 quality of life and increased hospital use. Furthermore, with population ageing, it is  
40 likely that the number of older people at risk of social isolation and loneliness will  
41 continue to grow, as will their rates of ED use. The ED visit provides an opportunity  
42 to systematically identify social isolation, loneliness or depressive symptoms. If  
43 proven effective, implementation of peer support through *HOW R U?* should help  
44 combat the associated deleterious consequences, thereby diminishing this important  
45 public health and individual burden.

46  
47  
48  
49 *HOW R U?* has the potential to reduce symptoms of depression, loneliness and  
50 social isolation amongst vulnerable older people, as well as improve quality of life.  
51 Volunteers represent a significant adjunct resource for meeting some of the health  
52 and social care service needs of our more vulnerable older population. Additional  
53 benefits include the positive effects that the act of meaningful volunteering has on  
54 the peer supporter, including a positive correlation between volunteering and  
55

1  
2  
3 perceived health, and a negative correlation with depression in older volunteers [31].  
4 Maintenance of an effective high quality volunteer service requires professional staff  
5 to coordinate and manage recruitment, training, and the provision of day-to-day  
6 supervision, support and oversight; however the use of volunteers in hospitals has  
7 been shown to be cost-effective alongside increased levels of patient satisfaction  
8 [32]. Our qualitative and quantitative findings will now inform the design of a future  
9 randomised controlled trial and program evaluation.  
10  
11  
12  
13  
14  
15  
16  
17  
18  
19  
20  
21  
22  
23  
24  
25  
26  
27  
28  
29  
30  
31  
32  
33  
34  
35  
36  
37  
38  
39  
40  
41  
42  
43  
44  
45  
46  
47  
48  
49  
50  
51  
52  
53  
54  
55  
56  
57  
58  
59  
60

For peer review only

## REFERENCES

1. Aminzadeh F, Dalziel WB. Older adults in the emergency department: a systematic review of patterns of use, adverse outcomes, and effectiveness of interventions. *Ann Emerg Med*. 2002 Mar;39(3):238-47.
2. Molloy GJ, McGee HM, O'Neill D, Conroy RM. Loneliness and emergency and planned hospitalizations in a community sample of older adults. *J Am Geriatr Soc*. 2010 Aug;58(8):1538-41.
3. Coe RM, Wolinsky FD, Miller DK, Prendergast JM. Elderly persons without family support networks and use of health services: a follow-up report on social network relationships. *Research on aging*. 1985;7(4):617-22.
4. Hawton A, Green C, Dickens AP, Richards SH, Taylor RS, Edwards R, et al. The impact of social isolation on the health status and health-related quality of life of older people. *Qual Life Res*. 2010 Feb;20(1):57-67.
5. Dickens AP, Richards SH, Greaves CJ, Campbell JL. Interventions targeting social isolation in older people: a systematic review. *BMC Public Health*. 2011;11:647.
6. Choi NG, Marti CN, Bruce ML, Kunik ME. Relationship between depressive symptom severity and emergency department use among low-income, depressed homebound older adults aged 50 years and older. *BMC Psychiatry*. 2012;12:233.
7. Mistry R, Rosansky J, McGuire J, McDermott C, Jarvik L. Social isolation predicts re-hospitalization in a group of older American veterans enrolled in the UPBEAT Program. *Unified Psychogeriatric Biopsychosocial Evaluation and Treatment*. *Int J Geriatr Psychiatry*. 2001 Oct;16(10):950-9.
8. Lowthian J, Straney LD, Brand CA, Barker AL, Smit Pde V, Newnham H, et al. Unplanned early return to the emergency department by older patients: the Safe Elderly Emergency Department Discharge (SEED) project. *Age Ageing*. 2016 Mar;45(2):255-61.
9. Lowthian JA, Straney LD, Brand CA, Barker A, Smit PV, Newnham H, et al. Predicting functional decline in older emergency patients-the Safe Elderly Emergency Discharge (SEED) project. *Age Ageing*. 2017 Mar 01;46(2):219-25.
10. Paul G, Smith SM, Whitford D, O'Kelly F, O'Dowd T. Development of a complex intervention to test the effectiveness of peer support in type 2 diabetes. *BMC Health Serv Res*. 2007;7:136.
11. Dale J, Caramlau IO, Lindenmeyer A, Williams SM. Peer support telephone calls for improving health (Review). *The Cochrane Collaboration*. 2009.
12. Dale J, Caramlau IO, Lindenmeyer A, Williams SM. Peer support telephone calls for improving health. *The Cochrane database of systematic reviews*. 2008(4):CD006903.
13. Dale J, Caramlau I, Sturt J, Friede T, Walker R. Telephone peer-delivered intervention for diabetes motivation and support: the telecare exploratory RCT. *Patient education and counseling*. 2009 Apr;75(1):91-8.
14. Steptoe A, Shankar A, Demakakos P, Wardle J. Social isolation, loneliness, and all-cause mortality in older men and women. *Proceedings of the National Academy of Sciences of the United States of America*. [Research Support, N.I.H., Extramural Research Support, Non-U.S. Gov't]. 2013 Apr 9;110(15):5797-801.
15. Hughes ME, Waite LJ, Hawkey LC, Cacioppo JT. A Short Scale for Measuring Loneliness in Large Surveys: Results From Two Population-Based Studies. *Research on aging*. 2004;26(6):655-72.
16. Rinaldi P, Mecocci P, Benedetti C, Ercolani S, Bregnocchi M, Menculini G, et al. Validation of the five-item geriatric depression scale in elderly subjects in three different settings. *J Am Geriatr Soc*. 2003 May;51(5):694-8.
17. Folstein MF, Folstein SE, McHugh PR. "Mini-Mental State: A Practical Method for Grading the Cognitive State of Patients for the Clinician. *J Psychiatric Research*. 1975;12:189-98.
18. Lowthian JA, Lennox A, Curtis A, Dale J, Browning C, Smit V, et al. HOspitals and patients WoRking in Unity (HOW R U?): protocol for a prospective feasibility study of telephone peer support

- 1  
2  
3 to improve older patients' quality of life after emergency department discharge. *BMJ open*. 2016  
4 Dec 02;6(12):e013179.
- 5 19. Kendrick D, Lyons R, Christie N, Towner E, Bengner J, Groom L, et al. Recruiting participants  
6 for injury studies in emergency departments. *Injury Prevention*. 2007;13(2):75-7.
- 7 20. National Ageing Research Institute. *beyondblue* depression in older age: a scoping study.  
8 Final Report. 2009.
- 9 21. Heisler M, Halasyamani L, Resnicow K, Neaton M, Shanahan J, Brown S, et al. "I am not  
10 alone": the feasibility and acceptability of interactive voice response-facilitated telephone peer  
11 support among older adults with heart failure. *Congestive heart failure*. 2007 May-Jun;13(3):149-57.
- 12 22. Cattan M, Kime N, Bagnall AM. Low-level support for socially isolated older people - An  
13 evaluation of telephone befriending. London: Help the Aged,, 2009.
- 14 23. Windle K, Francis J, Coomber C. Preventing loneliness and social isolation: interventions and  
15 outcomes. London: 2011.
- 16 24. Office for National Statistics. Measuring National Well-being - Older people and loneliness,  
17 2013. London: 2013.
- 18 25. Franklin A, Tranter B. Loneliness in Australia. 2008.
- 19 26. National Ageing Research Institute. *beyondblue* depression in older age: a scoping study.  
20 2009.
- 21 27. Unutzer J, Katon W, Callahan CM, Williams JW, Jr., Hunkeler E, Harpole L, et al. Depression  
22 treatment in a sample of 1,801 depressed older adults in primary care. *J Am Geriatr Soc*. 2003  
23 Apr;51(4):505-14.
- 24 28. Lowthian JA, Curtis AJ, Cameron PA, Stoelwinder JU, Cooke MW, McNeil JJ. Systematic  
25 review of trends in emergency department attendances: an Australian perspective. *Emerg Med J*.  
26 [Research Support, Non-U.S. Gov't  
27 Review]. 2011 May;28(5):373-7.
- 28 29. Rottenberg Y, Jacobs JM, Stessman J. Depression and health service utilization from age 70  
29 to 85: the Jerusalem Longitudinal Study. *Journal of the American Medical Directors Association*. 2013  
30 Sep;14(9):711 e1-6.
- 31 30. Holt-Lunstad J, Smith TB, Layton JB. Social relationships and mortality risk: a meta-analytic  
32 review. *PLoS medicine*. 2010 Jul 27;7(7):e1000316.
- 33 31. Wheeler JA, KM G, Greenblatt B. The beneficial effects of volunteering for older volunteers  
34 and ht epeople they serve: a meta-analysis. *Int J Aging and Human Development*. 1998;47(1):69-79.
- 35 32. Hotchkiss RB, Fottler MD, Unruh L. Valuing volunteers: the impact of volunteerism on  
36 hospital performance. *Health Care Manage Review*. 2009;34(2):119-28.
- 37  
38  
39  
40  
41  
42  
43  
44  
45  
46  
47  
48  
49  
50  
51  
52  
53  
54  
55  
56  
57  
58  
59  
60

**STUDY PROTOCOL**

# Hospitals and Patients working in unity

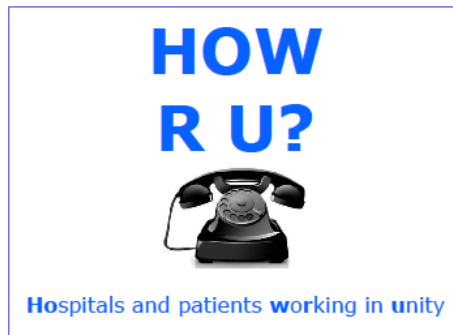

**FEASIBILITY OF A TELEPHONE SUPPORT SERVICE FOR OLDER PATIENTS**

**TO IMPROVE QUALITY OF LIFE**

**AFTER DISCHARGE FROM THE EMERGENCY DEPARTMENT**

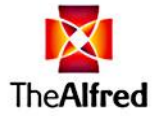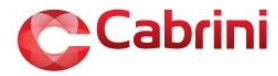

For peer review only

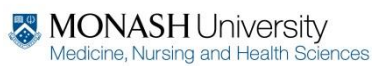

1  
2  
3  
4  
5  
6  
7  
8  
9  
10  
11  
12  
13  
14  
15  
16  
17  
18  
19  
20  
21  
22  
23  
24  
25  
26  
27  
28  
29  
30  
31  
32  
33  
34  
35  
36  
37  
38  
39  
40  
41  
42  
43  
44  
45  
46  
47  
48  
49  
50  
51  
52  
53  
54  
55  
56  
57  
58  
59  
60



## CONTENTS

|                                                                                                   |    |
|---------------------------------------------------------------------------------------------------|----|
| STUDY PROTOCOL.....                                                                               | 1  |
| Contents .....                                                                                    | 1  |
| 1. Study Investigators .....                                                                      | 3  |
| 2. Funder.....                                                                                    | 4  |
| 3. Study Sites .....                                                                              | 4  |
| 4. Project Summary .....                                                                          | 4  |
| 5. Rationale and Background.....                                                                  | 5  |
| 5.1 Increasing ambulance and ED use by older people aged 70 years and over .....                  | 5  |
| 5.2 Social isolation, loneliness and depressive mood amongst older ED patients .....              | 5  |
| 5.3 Social isolation, loneliness and depressed mood in older people in the community.....         | 5  |
| 5.4 Impact of social isolation, loneliness and depressed mood on physical and mental health ..... | 6  |
| 5.5 Potential mechanisms between loneliness, mood and health .....                                | 6  |
| 5.6 Public health impact of social isolation, loneliness and depressed mood.....                  | 6  |
| 5.7 A solution: <b>Hospitals and patients working in unity - 'HOW R U?'</b> .....                 | 7  |
| 6. Study aims.....                                                                                | 8  |
| 7. Objectives .....                                                                               | 8  |
| 8. Hypotheses .....                                                                               | 8  |
| 9. Study design.....                                                                              | 9  |
| 10. Study settings .....                                                                          | 9  |
| 11. Study population .....                                                                        | 9  |
| 12. Eligibility criteria .....                                                                    | 9  |
| 13. Study outcomes .....                                                                          | 9  |
| 13.1 Data .....                                                                                   | 10 |
| 13.2 primary outcomes.....                                                                        | 10 |
| 13.3 Secondary outcomes .....                                                                     | 10 |
| 13.4 Medium- and long- term outcomes.....                                                         | 10 |

1

'HOW R U?' Protocol Version 1.1\_ 6<sup>st</sup> Oct 2015

|    |                                                                  |    |
|----|------------------------------------------------------------------|----|
| 1  |                                                                  |    |
| 2  |                                                                  |    |
| 3  | 13.5 Anticipated contribution to improving patient outcomes..... | 11 |
| 4  |                                                                  |    |
| 5  | 14. Study Procedures.....                                        | 11 |
| 6  |                                                                  |    |
| 7  | 15. Data Management.....                                         | 16 |
| 8  |                                                                  |    |
| 9  | 16. Statistical Analysis.....                                    | 16 |
| 10 |                                                                  |    |
| 11 | 17. Ethical, Regulatory and Administrative Considerations .....  | 17 |
| 12 |                                                                  |    |
| 13 | 17.1 Ethical Considerations .....                                | 17 |
| 14 |                                                                  |    |
| 15 | 17.2 Information for Participants .....                          | 17 |
| 16 |                                                                  |    |
| 17 | 17.3 Regulatory Considerations.....                              | 18 |
| 18 |                                                                  |    |
| 19 | 17.4 Administrative organisation .....                           | 18 |
| 20 |                                                                  |    |
| 21 | 18. Study Flow .....                                             | 20 |
| 22 |                                                                  |    |
| 23 | 19. Project Plan and Performance Targets .....                   | 20 |
| 24 |                                                                  |    |
| 25 | 6 month targets .....                                            | 20 |
| 26 |                                                                  |    |
| 27 | 12 month targets .....                                           | 20 |
| 28 |                                                                  |    |
| 29 | 20. Outcomes and significance.....                               | 22 |
| 30 |                                                                  |    |
| 31 | 21. APPENDIX 1 – Participant Information and Consent Form.....   | 23 |
| 32 |                                                                  |    |
| 33 | 22. References.....                                              | 24 |
| 34 |                                                                  |    |
| 35 |                                                                  |    |
| 36 |                                                                  |    |
| 37 |                                                                  |    |
| 38 |                                                                  |    |
| 39 |                                                                  |    |
| 40 |                                                                  |    |
| 41 |                                                                  |    |
| 42 |                                                                  |    |
| 43 |                                                                  |    |
| 44 |                                                                  |    |
| 45 |                                                                  |    |
| 46 |                                                                  |    |
| 47 |                                                                  |    |
| 48 |                                                                  |    |
| 49 |                                                                  |    |
| 50 |                                                                  |    |
| 51 |                                                                  |    |
| 52 |                                                                  |    |
| 53 |                                                                  |    |
| 54 |                                                                  |    |
| 55 |                                                                  |    |
| 56 |                                                                  |    |
| 57 |                                                                  |    |
| 58 |                                                                  |    |
| 59 |                                                                  |    |
| 60 |                                                                  |    |

## 1. STUDY INVESTIGATORS

|                        |                                                                           |
|------------------------|---------------------------------------------------------------------------|
| Principal Investigator | Dr Judy Lowthian <sup>1</sup>                                             |
|                        | Senior Research Fellow                                                    |
|                        | School of Public Health and Preventive Medicine, Monash University        |
|                        | Level 6, Alfred Centre                                                    |
|                        | 99 Commercial Road                                                        |
|                        | Melbourne, 3004                                                           |
|                        | T: +61 3 9903 0360                                                        |
|                        | F: +61 3 9903 0556                                                        |
|                        | M: +61 412 116 571                                                        |
|                        | E: <a href="mailto:Judy.Lowthian@monash.edu">Judy.Lowthian@monash.edu</a> |
| Co-Investigator        | Dr Andrea Curtis <sup>1</sup>                                             |
| Co-Investigator        | Professor Peter Cameron <sup>1,2</sup>                                    |
| Co-Investigator        | Dr De Villiers Smit <sup>2</sup>                                          |
| Co-Investigator        | Mrs Gillian Wilson <sup>3</sup>                                           |
| Co-Investigator        | Dr Deborah O'Brien <sup>4</sup>                                           |
| Co-Investigator        | Associate Professor Lee Boyd <sup>5</sup>                                 |
| Co-Investigator        | Ms Natalie Sullivan <sup>6</sup>                                          |
| Co-Investigator        | Ms Cath Garner <sup>7</sup>                                               |
| Co-Investigator        | Professor Colette Browning <sup>8</sup>                                   |
| Co-Investigator        | Professor Jeremy Dale <sup>9</sup>                                        |

1. School of Public Health and Preventive Medicine, Monash University
2. Emergency and Trauma Centre, Alfred Health
3. Volunteer Services, Alfred Health
4. Emergency Department, Cabrini Health
5. Nursing Services and Cabrini Institute, Cabrini Health
6. Continuing Care, Cabrini Health
7. Mission and Strategy, Cabrini Health
8. RDNS Institute, RDNS
9. Primary Care, Warwick Medical School, University of Warwick

## 2. FUNDER

2014 Monash Partners Academic Health Science Centre Seed Funding Initiative

- Alfred Health

## 3. STUDY SITES

Alfred Hospital - Emergency and Trauma Centre  
55 Commercial Road  
Melbourne, 3004

Cabrini Hospital – Emergency Department  
183 Wattletree Road  
Malvern, 3144

## 4. PROJECT SUMMARY

Older people are disproportionately represented in private and public Emergency Departments (EDs) and hospitals.<sup>1-3</sup> Many lack social support and have symptoms of loneliness, social isolation, and/or depression; <sup>4-6</sup> all of which are associated with negative health outcomes, functional decline, institutionalisation, mortality and increased hospital use.<sup>7-10</sup> Up to 56% of community-dwelling ED patients feel socially isolated <sup>11</sup> and 24% have depressive feelings. <sup>12</sup> Social isolation is associated with a four to five-fold increase in the likelihood of early ED re-attendance and admission to hospital. <sup>10</sup> Providing targeted post-discharge telephone support may diminish this significant individual and health system burden.

This pragmatic uncontrolled pilot study will examine the acceptability and feasibility of providing volunteer-peer telephone support for older patients identified in the ED or acute medical ward as being at risk of repeated ED attendance and hospital admission, with the aim of improving their quality of life and reducing their risk of avoidable re-attendance and hospitalisation.

## 5. RATIONALE AND BACKGROUND

### 5.1 INCREASING AMBULANCE AND ED USE BY OLDER PEOPLE AGED 70 YEARS AND OVER

People aged  $\geq 70$  years are the highest users of ambulances and EDs,<sup>3 13</sup> and are four times more likely to re-attend the ED within 12 months than those  $< 70$  years of age.<sup>2</sup> They are also more likely to be admitted to hospital.<sup>14</sup> Attendance at ED contributes to unsustainable demand for acute hospital care. An ED attendance is described as a sentinel event for an older person,<sup>15 16</sup> with heightened risk of unplanned re-attendance and hospitalisation, functional decline, admission to nursing care homes and death well documented in subsequent months.<sup>4 17 18</sup>

### 5.2 SOCIAL ISOLATION, LONELINESS AND DEPRESSIVE MOOD AMONGST OLDER ED PATIENTS

Older people aged  $\geq 70$  years presenting to ED have a high likelihood of loneliness, social isolation, lack of social support<sup>19 4</sup> or feelings of depression.<sup>20 21</sup> Feeling depressed is associated with higher rates of ambulance use<sup>22</sup> and ED attendance.<sup>23</sup> Social isolation is also associated with a 4-5 fold increase in the likelihood of re-presentation and admission to hospital within 12 months.<sup>10</sup> In addition, feeling sad or depressed is an independent predictor of early and frequent re-attendance to the ED by older patients, after controlling for medical history and diagnosis.<sup>24</sup>

Prevalence estimates of loneliness or depressive feelings in older ED patients range from 16% to 42%.<sup>5</sup> Our research identified that 56% of a community-dwelling older ED cohort felt socially isolated,<sup>11</sup> and 24% had depressive symptoms (unpublished data).<sup>12</sup> This is consistent with another Australian study of ED patients.<sup>25</sup> Loneliness, social isolation and depression are also associated with higher rates of re-hospitalisation.<sup>10</sup>

Changes in family structures and circumstances, and fragmentation of social support networks are possible contributing factors.<sup>26</sup> In addition, current government policies encourage older people to remain living in their own homes, with one in four older Australians living at home alone.<sup>27</sup>

### 5.3 SOCIAL ISOLATION, LONELINESS AND DEPRESSED MOOD IN OLDER PEOPLE IN THE COMMUNITY

Social isolation, loneliness and depressed mood are distinct entities that are prevalent amongst older community-dwellers, and studies indicate that:

- 17% of older people have less than weekly contact with family, friends or neighbours, and 11% have less than monthly contact<sup>28</sup>
- the television is the main company for 40% of older people<sup>29</sup>
- 12% of the population aged  $\geq 65$  years feel socially isolated<sup>30</sup>
- loneliness amongst older community dwellers is as high as 50% in the UK and Australia<sup>31 32</sup>
- self-reported older age depression ranges from 6% to 20% in Australian community-dwellers<sup>33</sup>

These self-reported rates probably *under-represent* true levels because of an associated stigma amongst older people that such feelings are a character weakness, and that “one should be able to cope or pull themselves together”.<sup>33</sup> Therefore older patients with loneliness or depressive feelings are highly likely not to be identified,<sup>34</sup> reducing the opportunity for appropriate support being implemented in the community.

#### 5.4 IMPACT OF SOCIAL ISOLATION, LONELINESS AND DEPRESSED MOOD ON PHYSICAL AND MENTAL HEALTH

Recent research indicates that social isolation and loneliness are associated with negative health outcomes and lower health-related quality of life:<sup>7 8</sup>

- social isolation and lack of social support have an impact on early mortality that is equivalent to smoking <15 cigarettes/day or being an alcoholic (meta-analysis of 148 studies, N=308,000), with socially connected people 50% more likely to survive than those who are socially isolated over the same time period<sup>35</sup>
- social isolation is associated with excess risk of incident stroke in community-dwellers<sup>36</sup>
- loneliness increases the risk of high blood pressure over a 4-year period<sup>37</sup>
- loneliness is associated with greater risk of cognitive decline and poorer cognitive function in the elderly<sup>38-40</sup> as well as a 64% increased chance of developing dementia<sup>41</sup>
- loneliness is a risk factor for developing depression;<sup>42 43</sup> and together with social isolation is predictive of suicide in older age<sup>44</sup>
- depression and depressive symptoms are associated with an increased risk of incident dementia, in particular Alzheimer's disease and vascular dementia<sup>45</sup>
- people with depressive symptoms have an increased risk of developing type 2 diabetes not explained by use of antidepressants<sup>46</sup>
- amongst older people, depressive symptoms are recognised as an independent risk factor for the development of coronary heart disease and total mortality<sup>45</sup>

#### 5.5 POTENTIAL MECHANISMS BETWEEN LONELINESS, MOOD AND HEALTH

The evidence-base is evolving and mechanisms are yet to be fully elucidated, however it is postulated that social isolation and loneliness affect health through:

- health-related behavioural factors - a greater risk of smoking and physical inactivity; and
- biological processes - a positive association with blood pressure, C-reactive protein, HbA1c and fibrinogen levels has been observed.<sup>47 48</sup>

In summary, the consequences of social isolation, loneliness and depressive symptoms in older people have far-reaching public health impacts in terms of reduced quality of life and increased hospital use. Furthermore, with population ageing, it is likely that the number of older people at risk of social isolation and loneliness will continue to grow, as will their rates of ED use.

#### 5.6 PUBLIC HEALTH IMPACT OF SOCIAL ISOLATION, LONELINESS AND DEPRESSED MOOD

These risk factors for increased hospital use and poor health outcomes are not routinely screened for during ED attendances or short hospital admissions other than in the research setting. This provides an opportunity to identify older patients who are at risk of further negative health outcomes and increased acute health service use. Targeted management of older people suffering from social isolation, loneliness or depressive symptoms has been shown to be effective.<sup>8</sup> It is highly probable that systematic identification at the time of ED attendance, with post-discharge support will help combat these negative consequences, and diminish this important public health and individual burden.

## 5.7 A SOLUTION: Hospitals and patients working in unity - 'HOW R U?'

*HOW R U?* is an innovative telephone support service for community-living older people at risk of avoidable repeat hospital attendance. The intervention will be delivered by experienced hospital-based volunteer-peers.

*Theoretical basis:* Peer support - the provision of knowledge, experience, emotional or practical help - can be used with patients transitioning from hospital to home to ensure quality of life.<sup>49</sup> Peer support increases well-being through the direct effect model, where peer support affects health outcomes by decreasing feelings of social isolation through the provision of relevant information, encouragement, motivation and reassurance.<sup>50</sup> The social support model also postulates that social relationships promote health and well-being; thus peer support is hypothesised to reduce feelings of social isolation and loneliness, thereby improving well-being.<sup>51</sup>

Peer support is usually provided by a person sharing common characteristics with the patient, such as age, gender, socio-economic status, ethnicity, or the experience of illness. It is characterised by equivalent "status" between peer and patient,<sup>52</sup> facilitating a high level of empathy in a non-confrontational manner. Peers may be volunteers who are trained to support and listen, but not to give medical advice or judgement. Their non-medical status helps to overcome any reluctance that patients may have in discussing feelings of loneliness or isolation; thus helping to bridge the gap between patients and health professionals.<sup>53 54</sup>

*Learning from successful peer support programs:* Peer support programs are currently used in Australia and overseas to complement and extend formal primary care services for patients with heart disease,<sup>55</sup> diabetes<sup>56</sup> and depression.<sup>57</sup> Meta-analysis indicated that peer support interventions for depressive symptoms were more effective than usual care, and comparable to cognitive behavioural therapy delivered by psychologists in group settings.<sup>57</sup> A Peer Support Program (PSP) for older adults in the USA resulted in decreased levels of depression, improved overall quality of life and health and functioning; and also reduced healthcare service use including ED attendances, admissions to hospital, nursing care facility admissions, and community doctor visits.<sup>58</sup> To our knowledge this is the only program that has measured the impact of a PSP on health service use. Peer support interventions, which can be delivered via telephone calls, home visits and group meetings, are becoming an increasingly important strategy for financially constrained health systems.

*Telephone support:* The telephone is increasingly used to deliver healthcare advice and support for patients. Many older people have telephone access and are likely to accept telephone-mediated peer support. Telephone-based peer support can be a satisfactory substitute for face-to-face interaction, and many people prefer the relative anonymity and increased privacy of talking on the phone.<sup>59</sup>

Evaluation of the UK 'Call in Time' telephone 'befriending' service, indicated that it had a positive impact on older people's health and well-being, providing them with a sense of belonging, and 'knowing there's a friend out there'.<sup>60</sup> This resonates with our current study of older Alfred Hospital ED patients,<sup>12</sup> who verbalised their appreciation for our interest in them following their ED attendance. Likewise Cabrini Hospital ED's nurse-directed safe discharge telephone follow-up is most positively received by patients and families. Telephone help-lines such as *Nurse-On-Call* can provide supportive advice for older people; however they rely on the patient initiating the call. In contrast, *HOW R U* will reach out to patients identified as potentially able to benefit.

Dale et al's Cochrane Review investigated the effects of *peer support telephone calls* for improving physical, psychological, behavioural and other health outcomes.<sup>53</sup> Seven RCTs providing telephone peer support targeting improvements in various health conditions and behaviours were effective in reducing depressive symptoms in new mothers, and in encouraging dietary change in patients after myocardial infarction.

*Hospital volunteers as peers:* Hospital volunteers are trained to help support patients and families during an acute hospital admission or ED visit, which is, in effect, providing 'peer' support. With additional training and

1  
2  
3 support, this volunteer role could be transferred beyond the hospital to provide older community-based patients  
4 with telephone peer support and social contact following discharge from the ED or hospital. Care plans with  
5 referral/linkage to community services are often instigated prior to ED discharge; however these are largely  
6 ineffective, unless *hospital-based telephone follow-up* is included.<sup>61</sup> *HOW R U?* will encourage the uptake of  
7 these recommended services.  
8

9  
10 *HOW R U?* is an innovative volunteer-peer telephone-based support service designed to support older people  
11 with symptoms of social isolation, loneliness and depressive mood. It *builds* on Dale et al's feasibility and  
12 acceptability study of telephone peer support.<sup>54</sup> *HOW R U?* comprises routine screening for social isolation,  
13 loneliness and depressive symptoms at the time of an ED attendance, with volunteer-peer telephone-support  
14 and GP liaison immediately following hospital discharge to the community. *HOW R U?* extends the supportive  
15 role of the hospital volunteer beyond the hospital walls into the community setting, and also link with other  
16 community initiatives. The aim is to target patients with the risk factors of loneliness, isolation and depressive  
17 symptoms, in order to reduce the likelihood of ED re-attendance and admission to hospital in older people. The  
18 intervention has been designed in a format with supporting implementation resources (including a training  
19 manual) that allow wide transferability should it be proven to be cost-effective.  
20  
21

## 22 23 6. STUDY AIMS

24  
25 This study will test the feasibility and acceptability of *HOW R U?*, a volunteer-peer telephone-support service  
26 designed to support older vulnerable people after hospitalisation with the aim of improving their quality of life  
27 and reducing their risk of avoidable re-attendance and hospitalisation.  
28

29 This pilot study represents the preparatory work for a randomised controlled trial and program evaluation to  
30 test the effectiveness of *HOW R U?* compared with usual care in reducing re-attendances and hospitalisations  
31 over a 12 month period.  
32  
33

## 34 35 7. OBJECTIVES

36 A specific objective is to determine whether volunteer-peer telephone support is associated with improvement  
37 in mood status and health-related quality of life in older ED patients with symptoms of social isolation, loneliness  
38 or depression.  
39  
40

## 41 42 8. HYPOTHESES

43 Volunteer-peer telephone-support will help reduce symptoms of social isolation, loneliness and depressive  
44 feelings, through an improvement in mood and quality of life; and these effects will be associated with a  
45 reduction in the rate of return ED visits and hospital re-admissions over time.  
46

47 Figure 1 summarises the hypothesised effects of *HOW R U?* in older patients with symptoms of social isolation,  
48 loneliness and depressive symptoms, after discharge from ED.  
49  
50  
51  
52  
53  
54  
55  
56

57 **Figure 1: Hypothesised effects of *HOW R U?***  
58  
59  
60



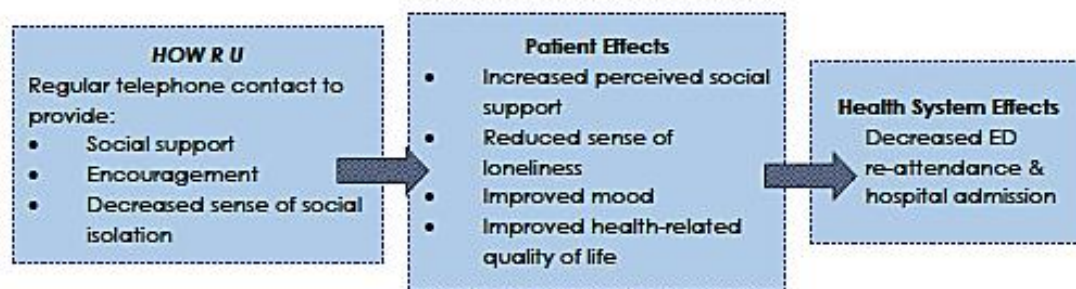

## 9. STUDY DESIGN

A pragmatic uncontrolled feasibility study of a volunteer-peer telephone-support service (*HOW R U?*) for older patients identified in Emergency Department (ED) or acute medical wards being at risk of repeated ED attendance and hospital admission.

## 10. STUDY SETTINGS

Participants will be recruited from two EDs, Short-Stay Units (SSUs) and acute medical wards at The Alfred and Cabrini Hospitals, which are large tertiary referral providers of health care that capture public and private hospital patients in the inner south-eastern suburbs of Melbourne.

## 11. STUDY POPULATION

Fifty community-dwelling men and women aged 70 years and over who attend ED and who provide voluntary informed consent, will be recruited from the ED and acute medical wards at Cabrini and The Alfred Hospitals.

## 12. ELIGIBILITY CRITERIA

Eligible patients at risk of ED re-attendance and hospital re-admission and meeting the inclusion criteria will be invited to participate.

### 12.1 INCLUSION CRITERIA

Patients who screen positive for symptoms of social isolation, depression and/or loneliness, with the Social Isolation Index, Geriatric Depression Scale–5 items (GDS-5) and 3-item Loneliness Scale.<sup>62-64</sup>

### 12.2 EXCLUSION CRITERIA

Patients triaged in ED as category 1 or 2 level of urgency, or requiring surgery; living in nursing care homes; receiving end-of life care or likely to be approaching end-of-life within 12 months using the Supportive Care and Palliative Care Indicators Tool (SPICT) criteria;<sup>65</sup> with moderate to severe cognitive impairment: Mini Mental State Exam (MMSE)<sup>66</sup> with a confirmed diagnosis of dementia or severe mental illness such as schizophrenia or psychosis; or an inability or unwillingness to communicate by telephone.

## 13. STUDY OUTCOMES

---

### 13.1 DATA

*Baseline data* will be collected from the patient at the time of initial ED presentation, either in ED or acute medical ward, or by the RA over the telephone within 48 hours, including:

Socio-demographic details including age, gender, contact details, marital status, living conditions (alone/with others), carer status, pet ownership, current use of community services, comorbid health conditions, GP status (regular/group, clinic/none), health service use in previous 12 months (ED / hospital / GP / specialist / allied health professional), GP contact details.

The following measures, which demonstrate good psychometric properties and have been used in older community-dwelling patient research, will be applied:

- Social Isolation Index <sup>64</sup>
- Geriatric Depression Scale – 5 items (GDS-5) <sup>62</sup>: mood
- UCLA – 3 item Loneliness Scale <sup>63</sup>
- EQ-5D-5L: perceived health-related quality of life <sup>67</sup>, measuring five levels of severity in the dimensions of mobility, self-care, usual activities, pain/discomfort and anxiety/depression
- EQ VAS: visual analogue scale (0-100) measuring current health-related quality of life state <sup>67</sup>
- Mini Mental State Exam (MMSE) <sup>66</sup>: cognitive function

---

### 13.2 PRIMARY OUTCOMES

Evaluation of the acceptability of '*HOW R U?*' will include measurement of how helpful the intervention was to patients and the level of participation and retention in the intervention.

Outcomes will be measured using adaptations of the patient and volunteer experience inventories (PSEI and PVEQ), <sup>68</sup> and analysed using descriptive statistics.

Feedback will also be sought from patients and volunteers regarding the phone call experience and value, views about the intervention, benefits of the intervention, and suggestions to enhance the effectiveness of *HOW R U?* (frequency of calls, support needs).

---

### 13.3 SECONDARY OUTCOMES

Re-assessment of social isolation, loneliness, mood and health-related quality of life will be conducted at the end of the three month intervention, as follows:

- Social Isolation Index <sup>64</sup>
- Geriatric Depression Scale – 5 items (GDS-5) <sup>62</sup>: mood
- UCLA – 3 item Loneliness Scale <sup>63</sup>
- EQ-5D-5L: perceived health-related quality of life <sup>67</sup>, measuring five levels of severity in the dimensions of mobility, self-care, usual activities, pain/discomfort and anxiety/depression
- EQ VAS: visual analogue scale (0-100) measuring current health-related quality of life state <sup>67</sup>

Outcome data will be collected over the telephone by the study research assistant immediately following the three month period of weekly volunteer telephone social support.

---

### 13.4 MEDIUM- AND LONG- TERM OUTCOMES

- Development of a randomised controlled trial and program evaluation to test the effectiveness of *HOW R U?* compared with usual care in reducing re-attendances and hospitalisations over a 12 month period.
- To ascertain if *HOW R U?* can reduce:
  - symptoms of loneliness, social isolation and depression in vulnerable elderly people after hospital attendance
  - avoidable return to the ED or hospital

### 13.5 ANTICIPATED CONTRIBUTION TO IMPROVING PATIENT OUTCOMES

*HOW R U?* will impact on the health system by:

- Providing hospital outreach to older communities at risk of avoidable hospital admissions
- Obtaining evidence for efficacy of hospital volunteers as providers of social care for the growing elderly population

*HOW R U* has the potential to

- Reduce demand for emergency health services and free hospital resources for acute care

*HOW R U* has the potential to improve the health outcomes of vulnerable older people after hospital discharge by:

- Reducing levels of loneliness, social isolation, and depression amongst older age groups

## 14. STUDY PROCEDURES

### 14.1 ELIGIBILITY SCREENING AND RECRUITMENT

The study will be conducted in the EDs and acute medical wards in shifts of 4.5 hours, Monday – Saturday mornings.

The study research staff will liaise with the ED allied health team and acute medical ward nurse team leaders at the beginning of each shift to identify potential participants based on the inclusion criteria.

Potential participants will be screened by the study research staff for social isolation, loneliness, and depressed mood as well as for cognitive impairment.

Eligible participants will be invited to participate and provided a verbal description of the study and written plain language statement. Informed consent will be sought at the time of recruitment and confirmed at the first volunteer telephone call to reduce drop-out during the study.

If potentially suitable patients have been discharged from the ED or the acute medical ward, the Research Assistant will follow-up them up by telephone, to discuss the project and seek interest in participation in order to optimise recruitment numbers. Consent to notify the GP of involvement in the study will also be sought from the participant.

Participants will not be recruited until after their medical needs have been addressed. Recruitment personnel

1  
2  
3 will be clinicians experienced in the management of patients under duress; thereby respect the patient's needs  
4 first and foremost, over and above the participation in this study.  
5

## 6 7 14.2 HOW R U? INTERVENTION

8  
9 *HOW R U?* is based on the *peer support model*;<sup>53 54</sup> and extends the supportive role of hospital-based volunteers  
10 beyond the hospital walls into the community setting. It has been designed in consultation with potential  
11 consumers, hospital volunteers and clinicians.  
12

13 The *HOW R U?* intervention comprises:

- 14 • routine screening for social isolation, loneliness and/or depressive feelings in older users of ED at the  
15 index ED attendance or hospital admission, followed by
- 16 • weekly telephone support calls from a hospital volunteer (peer support person) over 3 months  
17 following ED and/or hospital discharge
- 18 • GP liaison immediately after ED and/or hospital discharge to the community
- 19 • referral to community-based services for ongoing support following the end of the study as needed  
20  
21  
22

23 An experienced older age hospital-based volunteer will be paired with a patient, matched by their preferred  
24 language.  
25

26 *Patients* will receive one telephone-support call every week over a three month period (up to 12 calls). The aim  
27 of the telephone calls is to provide emotional and social support. The first call will occur within 72 hours of  
28 discharge from ED or the acute medical ward.  
29

30 The phone calls will focus on encouraging and supporting the patient and providing social stimulation and  
31 informal guidance about strategies that patients feel would improve their well-being, such as better self-care,  
32 and/or social engagement with family, friends or community groups. Each call will be unstructured and patient-  
33 directed, however the volunteer will ask the patient to describe any changes since the previous call, the  
34 outcomes of any planned actions, and agree on new social goals. This model has been used by social service  
35 providers for older people in the community with positive outcomes,<sup>69</sup> but is yet to be trialled in a cohort  
36 following hospital discharge.  
37  
38

39 Any medical issues will be directed to the ED admitting officer at the hospital the participant attended.  
40  
41

## 42 43 14.3 VOLUNTEER TRAINING

44 All hospital-based volunteers involved in *HOW R U?* have participated in their respective hospital-based volunteer  
45 training program. These programs include workshops on:  
46

- 47 • confidentiality and privacy
- 48 • rights and responsibilities in healthcare
- 49 • professional and personal boundaries as a volunteer
- 50 • emotions and responses
- 51 • stress and self-care and
- 52 • communication and listening techniques  
53  
54

55 In addition, the study volunteers are actively involved in regular provision of *in-hospital* social and emotional  
56 support to acutely unwell patients and/or families.  
57  
58  
59  
60

At study commencement, the *HOW R U?* volunteers will attend a two-hour project orientation session, including

- an overview of peer support
- general information about mental health and ageing
- expectations of their role
- use of empathic listening technique by telephone
- policies and procedures
- confidentiality and boundaries
- risk management strategies regarding potential health concerns including recognition of mood changes, negativity and hopelessness and
- formal and informal community resources available to patients - a manual of community-based services and activities will be provided

The telephone calls will be conducted from the respective hospitals in an area allocated by the Volunteer Services Manager.

*HOW R U?* volunteers will be provided with a summary of their participants' baseline data collection forms prior to conducting the first phone calls.

In order to understand the impact of the various components of the intervention, telephone activity logs (TAL) will be maintained by the volunteer for each participant. The TAL will record the dates, times and length of each call, and the number of attempts required to make contact with the participant on each occasion. The content of calls made will be described using a simple template. Participant drop-outs and their reasons for doing so will also be recorded on the TAL. Random audits of the telephone calls and the TRF will ensure a standard approach is being used and fidelity of the intervention. The TAL will be stored in a locked filing cabinet in the area allocated for the telephone calls.

In addition, a sample of telephone calls will be audio-taped, (only if dual consent is provided by the participant and the volunteer-peer) to provide validation of the TAL, and to allow analysis of the extent to which the volunteer peers use the skills and guidance provided in the Orientation Manual. This will also inform future modification of the intervention

#### 14.5 SAFETY CONSIDERATIONS

The welfare, rights, dignity and safety of all participants in this study is paramount.

It is not anticipated that *HOW R U?* will cause any specific harm or discomfort, beyond the realms of a social telephone call, such as distress about one's personal situation, being bored or becoming fatigued. However if participants wish to either terminate an individual telephone call or cease their involvement in the study, they may do so at any time, without any interference to any care provided by their treating hospital - the Alfred or Cabrini.

If a volunteer is concerned about the physical or mental health of a participant, the volunteer will liaise directly with the relevant Emergency Physician Co-Investigators (Dr De Villiers Smit, Alfred Hospital ETC; and Dr Debra O'Brien, Cabrini Hospital ED upon study commencement. The concern will then be triaged and the participant's general practitioner will be contacted, as required. The Admitting Officer will then triage the concern and contact the participant's general practitioner, as required. If the volunteer has any other concerns, they will liaise directly with the Principal Researcher, Dr Judy Lowthian, who will then liaise with the Emergency Physician Co-Investigators, as above.

Volunteers will have access to their respective Volunteer Services Manager (Alfred or Cabrini) for advice and support throughout the study. A monthly meeting of volunteers with the Chief Investigator and the Hospital Volunteer Managers will enable debriefing of any issues or concerns that arise.

## Who to Call and When for any Physical or Mental Health Concerns

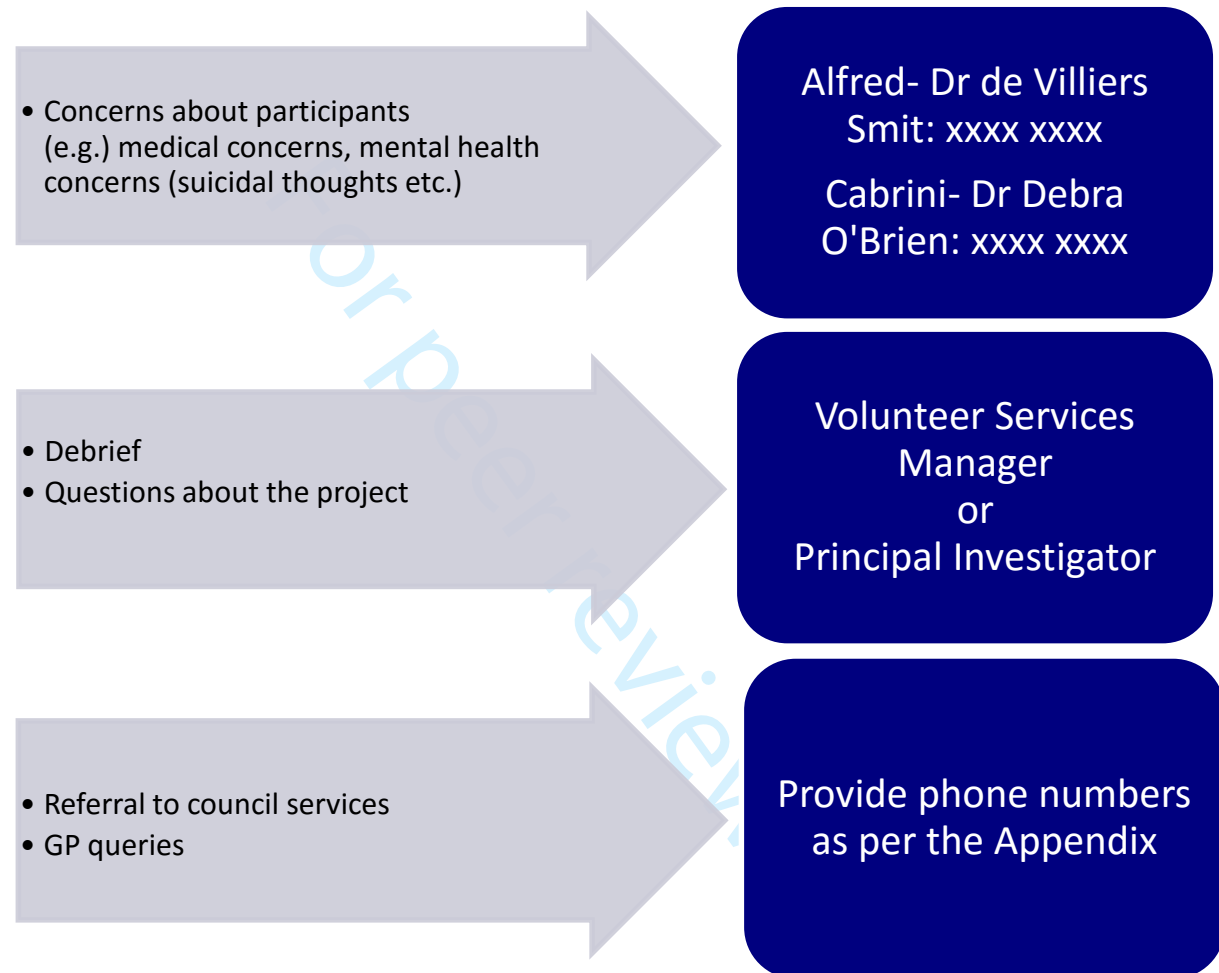

## Care Transition at the End of the Study

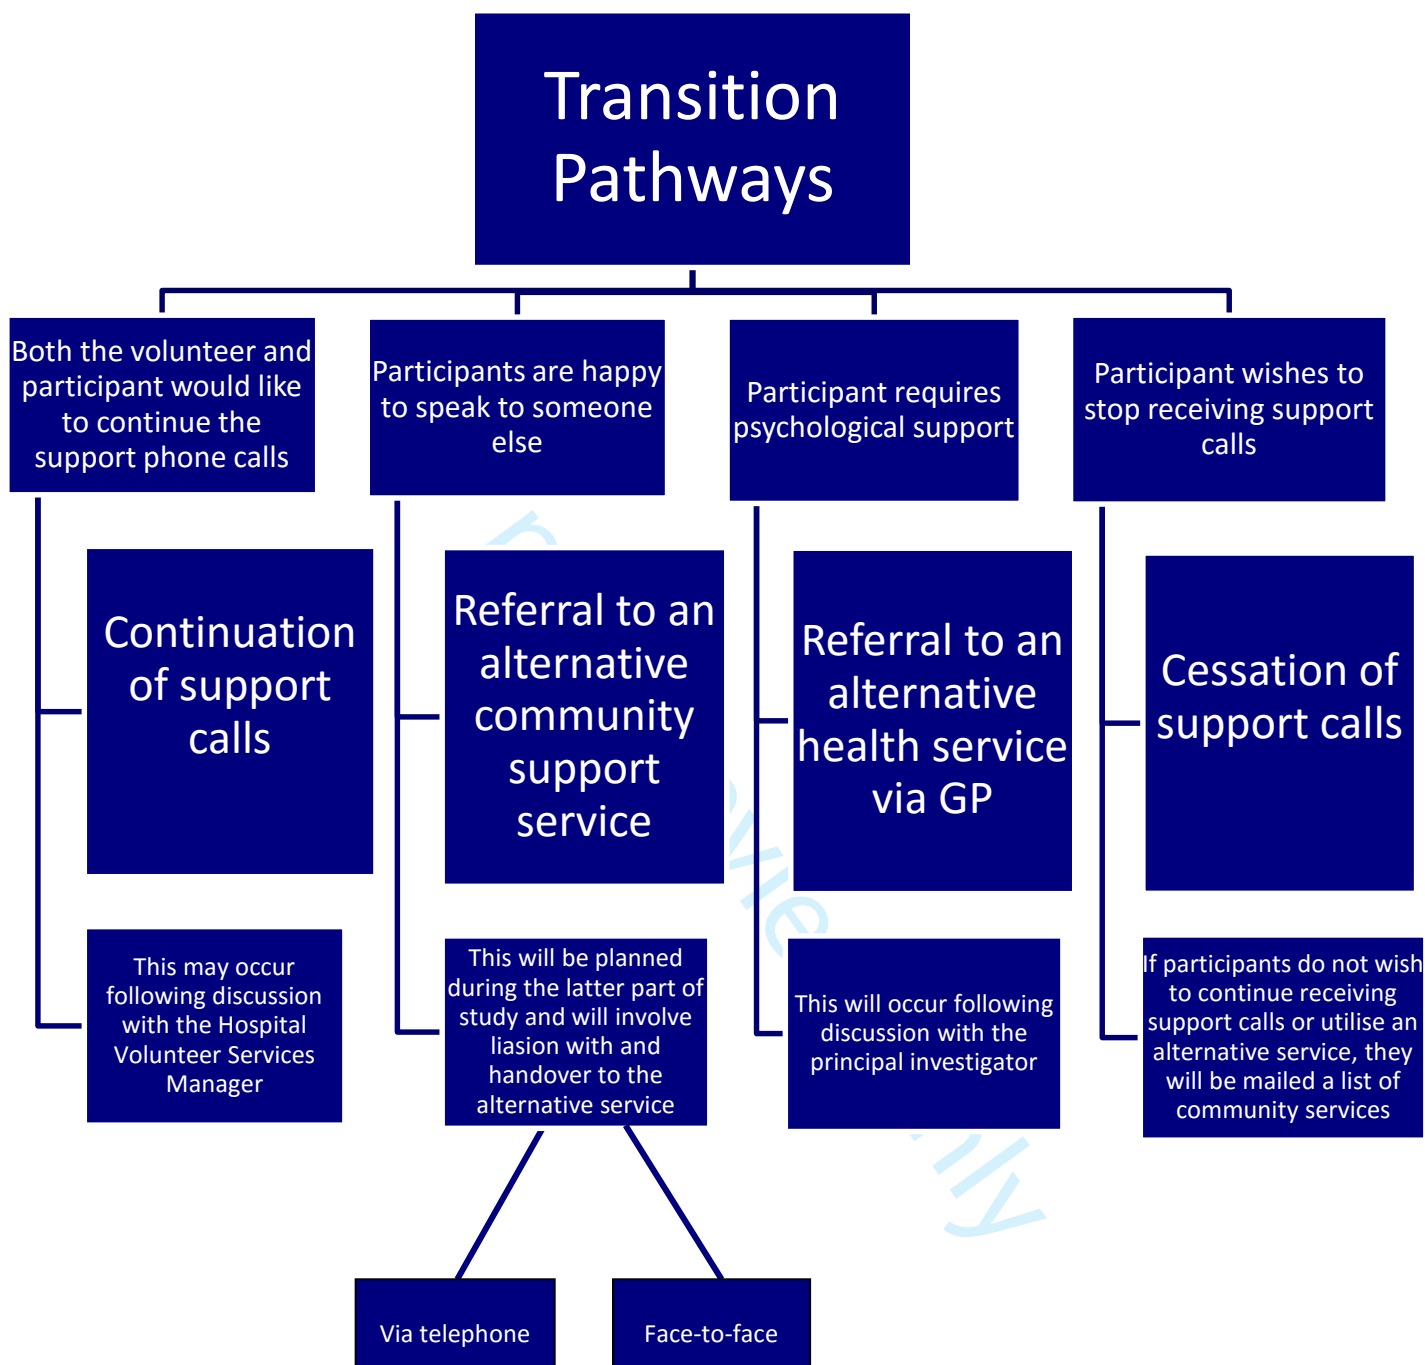

## 15. DATA MANAGEMENT

### 15.1 DATA HANDLING AND RECORD KEEPING

All data collected at baseline and at the 3 month outcome assessment telephone call will be recorded on a data collection form (DCF), and will be labelled with a project specific ID for each participant.

A telephone record form (TRF) will be maintained by the volunteers for each telephone support call as described above.

After this information is collated and entered onto an excel database, the hard copies of the DCFs and TRFs will be de-identified & stored in a locked filing cabinet in the School of Public Health and Preventive Medicine. The electronic data will not contain any identifiable information, and will be stored on a computer data base, and saved to a hard drive server in a secure area of the School of Public Health and Preventive Medicine, Monash University, Alfred Hospital campus. The database file is protected and accessible only to the researchers directly involved in the analysis. The hard drive file server is backed up daily to a facility nearby, which is available only to the Department IT Manager.

The privacy of individuals is of paramount importance, and all identifiers will be removed prior to the data being analysed in an aggregated form. It will not be possible to identify individuals from the results or any publications or presentations arising from this project.

Storage of all data collected will adhere to Monash University regulations and kept for up to 7 years from the completion data of the project. At that stage electronic data will be deleted and the hard copies will be shredded and disposed of securely.

### 15.2 QUALITY CONTROL

Following electronic data entry, a random selection of 10% of DCFs and TRFs will reviewed, to monitor of data entry accuracy.

## 16. STATISTICAL ANALYSIS

This project is a pragmatic uncontrolled feasibility study of 50 participants. Evaluation of the acceptability of *HOWRU* will include measurement of how helpful the intervention was to patients and the level of participation and retention in the intervention. Outcomes will be measured using the patient and volunteer experience inventories (PSEI and PVEQ)<sup>68</sup> and analysed using descriptive statistics. Feedback will also be sought from patients and volunteers regarding the phone call experience and value, views about the intervention, benefits of the intervention, and suggestions to enhance the effectiveness of *HOWRU* (frequency of calls, support needs).

Paired *t*-tests will be used to compare differences in pre- and post- intervention scores of mood, loneliness, quality of life and cognitive state, with a significance level of  $p=0.05$ .



## 17. ETHICAL, REGULATORY AND ADMINISTRATIVE CONSIDERATIONS

### 17.1 ETHICAL CONSIDERATIONS

*HOW R U* will be conducted in full compliance with the principles of the 1964 World Medical Association Declaration of Helsinki as revised in 2013,<sup>70</sup> the 2007 NHMRC Australian Code for the Responsible Conduct of Research as updated in 2014<sup>71</sup> and the 1996 ICH Guideline for Good Clinical Practice.<sup>72</sup>

Ethical Approval will be sought from the HRECs of Monash University, Alfred Health and Cabrini Health.

Written informed consent will be obtained from all participants as per the Participant Information and Consent Forms (Appendix 1).

Effective research governance and financial management of the project will be supported by Monash University in collaboration with Cabrini Health and Alfred Health. A Project Steering Group representing all investigators, researchers and stakeholders will meet monthly. Project outcomes will be published in the peer-reviewed literature and at conferences; with authorship determined in accordance with the 2007 NHMRC Australian Code for the Responsible Conduct of Research.

### 17.2 INFORMATION FOR PARTICIPANTS

- Before obtaining consent, all participants – the patient participants and the volunteer peers- must be informed of the objectives and what their participation involves.
- Written informed consent will be obtained as per the Participant Information and Consent Forms (Appendix 1). The forms used must be the current version that has been reviewed and approved by the relevant hospital ethics committee.
- Two copies of the signed and dated Consent Forms are to be made, one for the participant and one for the investigators to be stored in the participant's individual file. This Consent Form is to be signed by the participant and by the person who conducted the informed consent discussion.

---

## 17.3 REGULATORY CONSIDERATIONS

### 17.3.1 FINANCING

The study is supported by Alfred Health as part of the Monash Partners Academic Health Science Centre 2014 Seed Funding Initiative.

### 17.3.2 STUDY REGISTRATION

HOW R U is registered with ANZ Clinical Trials Registry.

Registration number: ACTRN12615000715572

Web address: <https://www.anzctr.org.au/Trial/Registration/TrialReview.aspx?id=368803>

Universal Trial Number: U1111-1117-4018

Web address: [http://www.who.int/ictrp/unambiguous\\_identification/utn/en/](http://www.who.int/ictrp/unambiguous_identification/utn/en/)

---

## 17.4 ADMINISTRATIVE ORGANISATION

### 17.4.1 HOW R U? STEERING COMMITTEE

The *HOW R U?* Steering Committee will be responsible for the overall management and conduct of the study, including finalising the protocol, approving the operational plan, research governance and financial management.

The committee will be chaired by Judy Lowthian; and will comprise all investigators plus individuals with special content expertise who will be invited to join the steering committee.

The steering committee plans to meet monthly.

### 17.4.1 PUBLICATION POLICY

Project outcomes will be published in the peer-reviewed literature and at conferences.

Manuscripts and abstracts relating to the *HOW R U?* study must include all investigators using the following guidelines in accordance with the 2007 NHMRC Australian Code for the Responsible Conduct of Research. [70]

A writing group will be established for each publication, from which a lead author will be identified who will be responsible for the initial manuscript draft.

The lead author will be the first author of the publication.

Subsequent authors will be listed according to the amount of input into the writing of the manuscript.

Both clinical sites and the funding agency are to be acknowledged in every publication or presentation.

1  
2  
3  
4  
5  
6  
7  
8  
9  
10  
11  
12  
13  
14  
15  
16  
17  
18  
19  
20  
21  
22  
23  
24  
25  
26  
27  
28  
29  
30  
31  
32  
33  
34  
35  
36  
37  
38  
39  
40  
41  
42  
43  
44  
45  
46  
47  
48  
49  
50  
51  
52  
53  
54  
55  
56  
57  
58  
59  
60

Initial drafts and major upgraded manuscripts and abstracts must be circulated to all co-authors when appropriate. Maximum response time for comments and amendments is one week.

For peer review only

## 18. STUDY FLOW

| <b>'HOW R U?' Study Process</b>                                                                                                                                                                                                                                                              |
|----------------------------------------------------------------------------------------------------------------------------------------------------------------------------------------------------------------------------------------------------------------------------------------------|
| <i>Hospital nurse/volunteer or research staff to screen patients ≥70 years upon ED/acute medical ward arrival for eligibility re: age, community-dwelling, social isolation index, <sup>64</sup>depressive symptoms(GDS-5)<sup>62</sup>/loneliness(3-item Loneliness Scale)<sup>63</sup></i> |
| <i>HOW R U project staff to explain trial and ascertain interest, obtain informed consent, then screen cognition (MMSE<sup>66</sup>) &amp; telephone access; and baseline data collection</i>                                                                                                |
| <i>Discharge from hospital to home</i>                                                                                                                                                                                                                                                       |
| <i>Three month period of weekly peer telephone support by hospital volunteers</i>                                                                                                                                                                                                            |
| <i>Outcome Assessment telephone call to participants by Study RA at 3 months re: primary and secondary outcomes</i>                                                                                                                                                                          |
| <i>Outcome assessment interviews with volunteers and patients at end of study re: feasibility and acceptability<br/>– Adaptation of the Peer Support Evaluation Inventories (PSEI &amp; PVEQ) <sup>68</sup></i>                                                                              |

## 19. PROJECT PLAN AND PERFORMANCE TARGETS

### 6 MONTH TARGETS

- HREC approval from Cabrini Health, Alfred Health, and Monash University
- Recruitment of research personnel
- Submission of Protocol paper for publication
- Development of intervention manual and volunteer-peers training sessions
- Launch study and recruitment (~ three months, with ~ five recruits per week)
- Commence 12 week *HOW R U* Intervention

### 12 MONTH TARGETS

- Follow-up outcome data collection (~ three months)
- Evaluation: participant patient and volunteer questionnaires
- Write up of results manuscript

| <b>Milestones</b>                                                      | <b>First 6 months</b> |   | <b>Second 6 months</b> |   |   |
|------------------------------------------------------------------------|-----------------------|---|------------------------|---|---|
| Recruit research personnel & volunteers, write protocol                | X                     |   |                        |   |   |
| Development of intervention manual, volunteer-peer training sessions   | X                     |   |                        |   |   |
| Launch study and recruitment (~three months, ~ five recruits per week) |                       | X |                        |   |   |
| <i>HOW R U</i> Intervention                                            |                       | X | X                      |   |   |
| Follow-up outcome data collection (~three months)                      |                       |   | X                      | X |   |
| Evaluation: participant patient and volunteer questionnaires           |                       |   |                        | X | X |
| Development of finalised <i>HOW R U</i> Intervention                   |                       |   |                        |   | X |
| Dissemination of results: papers & reports                             |                       |   |                        |   | X |

## 20. OUTCOMES AND SIGNIFICANCE

The proposed study will provide evidence for the feasibility and acceptability of an inexpensive volunteer-peer telephone support service for older patients at risk of re-attendance to ED. Importantly, 'HOW R U' has potential to improve quality of life for older people in the community by reducing symptoms of social isolation, loneliness and depressed mood. It will also raise awareness of mental health issues in older people for their GPs, health workers and family, and help redirect older people with symptoms of loneliness, social isolation and depressive mood to appropriate services in a timely way. This will facilitate closer relationships between hospitals and their communities. Secondary benefits include the positive effects that the act of meaningful volunteering has on the peer supporter; with a positive correlation between volunteering and perceived health, and a negative correlation between volunteering and depression in older volunteers.<sup>73</sup> Volunteers also represent a significant adjunct resource for meeting some of the health and social care service needs of our more vulnerable older population.

1  
2  
3  
4  
5  
6  
7  
8  
9  
10  
11  
12  
13  
14  
15  
16  
17  
18  
19  
20  
21  
22  
23  
24  
25  
26  
27  
28  
29  
30  
31  
32  
33  
34  
35  
36  
37  
38  
39  
40  
41  
42  
43  
44  
45  
46  
47  
48  
49  
50  
51  
52  
53  
54  
55  
56  
57  
58  
59  
60

21. APPENDIX 1 – PARTICIPANT INFORMATION AND CONSENT FORM

*To be inserted once approved by the HREC*

For peer review only

## 22. REFERENCES

1. Lowthian JA, Curtis AJ, Jolley DJ, Stoelwinder JU, McNeil JJ, Cameron PA. Demand at the ED front door: Ten-year trends in Emergency Department presentations. *Med J Aust* 2011;196(2):128-32.
2. Lowthian JA, Curtis AJ, Stoelwinder JU, McNeil JJ, Cameron PA. Emergency demand and repeat attendances by older patients. *Int Med J* 2013;43(5):554-60.
3. Lowthian JA, Jolley DJ, Curtis AJ, Currell A, Cameron PA, Stoelwinder JU, et al. The challenges of population ageing: Accelerating demand for emergency ambulance services by older patients, 1995-2015. *Med J Aust* 2011;194(11):574-78.
4. Aminzadeh F, Dalziel WB. Older adults in the emergency department: a systematic review of patterns of use, adverse outcomes, and effectiveness of interventions. *Ann Emerg Med* 2002;39(3):238-47.
5. Molloy GJ, McGee HM, O'Neill D, Conroy RM. Loneliness and emergency and planned hospitalizations in a community sample of older adults. *J Am Geriatr Soc* 2010;58(8):1538-41.
6. Coe RM, Wolinsky FD, Miller DK, Prendergast JM. Elderly persons without family support networks and use of health services: a follow-up report on social network relationships. *Research on aging* 1985;7(4):617-22.
7. Hawton A, Green C, Dickens AP, Richards SH, Taylor RS, Edwards R, et al. The impact of social isolation on the health status and health-related quality of life of older people. *Qual Life Res* 2010;20(1):57-67.
8. Dickens AP, Richards SH, Greaves CJ, Campbell JL. Interventions targeting social isolation in older people: a systematic review. *BMC Public Health* 2011;11:647.
9. Choi NG, Marti CN, Bruce ML, Kunik ME. Relationship between depressive symptom severity and emergency department use among low-income, depressed homebound older adults aged 50 years and older. *BMC Psychiatry* 2012;12:233.
10. Mistry R, Rosansky J, McGuire J, McDermott C, Jarvik L. Social isolation predicts re-hospitalization in a group of older American veterans enrolled in the UPBEAT Program. Unified Psychogeriatric Biopsychosocial Evaluation and Treatment. *Int J Geriatr Psychiatry* 2001;16(10):950-9.
11. Lowthian JA, Smith C, Stoelwinder JU, Smit DeV, McNeil JJ, Cameron PA. Why older patients of lower clinical urgency choose to attend the Emergency Department *Int Med J* 2013;43(1):59-65.
12. Lowthian J, Cameron P, Smit D, Newnham H, Hunter P, Brand C, et al. Safe Elderly Emergency Discharge. In: <http://www.seed.monash.org.au>, editor, 2012.
13. Lowthian JA, Curtis AJ, Jolley DJ, Stoelwinder JU, McNeil JJ, Cameron PA. Demand at the emergency department front door: 10-year trends in presentations. *Med J Aust* 2012;196(2):128-32.
14. Lowthian JA, Stoelwinder JU, McNeil JJ, Cameron PA. Is the increase in emergency short-stay admissions sustainable? Trends across Melbourne, 2000 to 2009. *Emerg Med Australas* 2012;24(6):610-6.
15. Sanders AB, Witzke D, Jones JS, Richmond K, Kidd P. Principles of care and application of the geriatric emergency care model. In: Sanders AB, editor. *Emergency Care of the Elder person*. St. Louis: Beverly Cram Publications, 1996:59-93.
16. Meldon SW, Mion LC, Palmer RM, Drew BL, Connor JT, Lewicki LJ, et al. A brief risk-stratification tool to predict repeat emergency department visits and hospitalizations in older patients discharged from the emergency department. *Acad Emerg Med* 2003;10(3):224-32.



17. Hastings SN, Schmader KE, Sloane RJ, Weinberger M, Goldberg KC, Oddone EZ. Adverse health outcomes after discharge from the emergency department -- incidence and risk factors in a veteran population. *J Gen Intern Med* 2007;22(11):1527-31.
18. McCusker J, Healey E, Bellavance F, Connolly B. Predictors of repeat emergency department visits by elders. *Acad Emerg Med* 1997;4(6):581-88.
19. Lowthian JA, Curtis AJ, Cameron PA, Stoelwinder JU, Cooke MW, McNeil JJ. Systematic review of trends in emergency department attendances: an Australian perspective. *Emerg Med J* 2011;28(5):373-7.
20. Choi NG, Marti CN, Bruce ML, Kunik ME. Relationship between depressive symptom severity and emergency department use among low-income, depressed homebound older adults aged 50 years and older. *BMC Psychiatry*;12:233.
21. Geller J, Janson P, McGovern E, Valdini A. Loneliness as a predictor of hospital emergency department use. *J Fam Pract* 1999;48:801-4.
22. Shah MN, Jones CM, Richardson TM, Conwell Y, Katz P, Schneider SM. Prevalence of depression and cognitive impairment in older adult emergency medical services patients. *Prehosp Emerg Care* 2010;15(1):4-11.
23. Rottenberg Y, Jacobs JM, Stessman J. Depression and health service utilization from age 70 to 85: the Jerusalem Longitudinal Study. *J Am Med Dir Assoc* 2013;14(9):711 e1-6.
24. McCusker J, Cardin S, Bellavance F, Belzile E. Return to the emergency department among elders: patterns and predictors. *Acad Emerg Med* 2000;7(3):249-59.
25. Joubert L, Lee J, McKeever U, Holland L. Caring for depressed elderly in the emergency department: establishing links between sub-acute, primary, and community care. *Soc Work Health Care* 2013;52(2-3):222-38.
26. Evans MDR, Kelley J. Trends in Women's Labour Force Participation in Australia: 1984-2002. In: Melbourne Institute of Applied Economic and Social Research, editor: Melbourne University, 2004.
27. Australian Bureau of Statistics. Living Arrangements of older Australians. In: ABS, editor. *1301.0 - Year Book Australia, 2012* 2012.
28. Victor C, Scrambler S, Bond J, Bowling A. Being alone in later life: loneliness, social isolation and living alone. *Reviews in Clinical Gerontology* 2000;10(4).
29. Age UK. Later Life in the United Kingdom, January 2015. In: Age UK, editor. London: [www.ageuk.org.uk/](http://www.ageuk.org.uk/), 2015.
30. Windle K, Francis J, Coomber C. Preventing loneliness and social isolation: interventions and outcomes. In: Social Care Institute for Excellence, editor. London, 2011.
31. Office for National Statistics. Measuring National Well-being - Older people and loneliness, 2013. In: office for National Statistics, editor. London, 2013.
32. Franklin A, Tranter B. Loneliness in Australia. In: Housing and Community Research Unit - University of Tasmania, editor, 2008.
33. National Ageing Research Institute. *beyondblue* depression in older age: a scoping study. In: NARI, editor, 2009.
34. Unutzer J, Katon W, Callahan CM, Williams JW, Jr., Hunkeler E, Harpole L, et al. Depression treatment in a sample of 1,801 depressed older adults in primary care. *J Am Geriatr Soc* 2003;51(4):505-14.

- 1
- 2
- 3 35. Holt-Lunstad J, Smith TB, Layton JB. Social relationships and mortality risk: a meta-analytic review. *PLoS Med*
- 4 2010;7(7):e1000316.
- 5
- 6 36. Nagayoshi M, Everson-Rose SA, Iso H, Mosley TH, Jr., Rose KM, Lutsey PL. Social network, social support, and
- 7 risk of incident stroke: Atherosclerosis Risk in Communities study. *Stroke* 2014;45(10):2868-73.
- 8
- 9 37. Hawkley LC, Thisted RA, Masi CM, Cacioppo JT. Loneliness predicts increased blood pressure: 5-year cross-
- 10 lagged analyses in middle-aged and older adults. *Psychol Aging* 2010;25(1):132-41.
- 11
- 12 38. James BD, Wilson RS, Barnes LL, Bennett DA. Late-life social activity and cognitive decline in old age. *Journal*
- 13 *of the International Neuropsychological Society : JINS* 2011;17(6):998-1005.
- 14
- 15 39. Shankar A, Hamer M, McMunn A, Steptoe A. Social isolation and loneliness: relationships with cognitive
- 16 function during 4 years of follow-up in the English Longitudinal Study of Ageing. *Psychosom Med*
- 17 2013;75(2):161-70.
- 18
- 19 40. O'Luanaigh C, O'Connell H, Chin AV, Hamilton F, Coen R, Walsh C, et al. Loneliness and cognition in older
- 20 people: the Dublin Healthy Ageing study. *Aging Ment Health* 2012;16(3):347-52.
- 21
- 22 41. Holwerda TJ, Deeg DJ, Beekman AT, van Tilburg TG, Stek ML, Jonker C, et al. Feelings of loneliness, but not
- 23 social isolation, predict dementia onset: results from the Amsterdam Study of the Elderly (AMSTEL). *J*
- 24 *Neurol Neurosurg Psychiatry* 2014;85(2):135-42.
- 25
- 26 42. Green BH, Copeland JR, Dewey ME, Sharma V, Saunders PA, Davidson IA, et al. Risk factors for depression in
- 27 elderly people: a prospective study. *Acta Psychiatr Scand* 1992;86(3):213-7.
- 28
- 29 43. Cacioppo JT, Hughes ME, Waite LJ, Hawkley LC, Thisted RA. Loneliness as a specific risk factor for depressive
- 30 symptoms: cross-sectional and longitudinal analyses. *Psychol Aging* 2006;21(1):140-51.
- 31
- 32 44. O'Connell H, Chin AV, Cunningham C, Lawlor BA. Recent developments: suicide in older people. *BMJ*
- 33 2004;329(7471):895-9.
- 34
- 35 45. Dinitz BS, Butters MA, Albert SM, et al. Late-life depression and risk of vascular dementia and Alzheimer's
- 36 disease: systematic review and meta-analysis of community-based cohort studies. *BJPsych*
- 37 2013;202:329-35.
- 38
- 39 46. Rotella F, Mannucci E. Depression as a risk factor for diabetes: a meta-analysis of longitudinal studies. *J Clin*
- 40 *Psychiatry* 2013;74(1):31-7.
- 41
- 42 47. Shankar A, McMunn A, Banks J, Steptoe A. Loneliness, social isolation, and behavioral and biological health
- 43 indicators in older adults. *Health Psychol* 2011;30(4):377-85.
- 44
- 45 48. O'Luanaigh C, O'Connell H, Chin AV, Hamilton F, Coen R, Walsh C, et al. Loneliness and vascular biomarkers:
- 46 the Dublin Healthy Ageing Study. *Int J Geriatr Psychiatry* 2012;27(1):83-8.
- 47
- 48 49. Stroke Foundation. National Stroke Foundation Peer Support Program : A report on the Hospital Peer Support
- 49 Program Pilot June 2008. [www.strokefoundation.com.au](http://www.strokefoundation.com.au), 2008.
- 50
- 51 50. Hoey LM, Ieropoli SC, White VM, Jefford M. Systematic review of peer-support programs for people with
- 52 cancer. *Patient Educ Couns* 2008;70(3):315-37.
- 53
- 54 51. Paul G, Smith SM, Whitford D, O'Kelly F, O'Dowd T. Development of a complex intervention to test the
- 55 effectiveness of peer support in type 2 diabetes. *BMC Health Serv Res* 2007;7:136.
- 56
- 57 52. Dale J, Caramlau IO, Lindenmeyer A, Williams SM. Peer support telephone calls for improving health (Review).
- 58 *The Cochrane Collaboration* 2009.
- 59
- 60

- 1  
2  
3 53. Dale J, Caramlau IO, Lindenmeyer A, Williams SM. Peer support telephone calls for improving health.  
4 *Cochrane Database Syst Rev* 2008(4):CD006903.  
5  
6 54. Dale J, Caramlau I, Sturt J, Friede T, Walker R. Telephone peer-delivered intervention for diabetes motivation  
7 and support: the telecare exploratory RCT. *Patient Educ Couns* 2009;75(1):91-8.  
8  
9 55. Parry M, Watt-Watson J. Peer support intervention trials for individuals with heart disease: a systematic  
10 review. *Eur J Cardiovasc Nurs* 2010;9(1):57-67.  
11  
12 56. Riddell MA, Renwick C, Wolfe R, Colgan S, Dunbar J, Hagger V, et al. Cluster randomized controlled trial of a  
13 peer support program for people with diabetes: study protocol for the Australasian Peers for Progress  
14 study. *BMC Public Health* 2012;12:843.  
15  
16 57. Pfeiffer PN, Heisler M, Piette JD, Rogers MA, Valenstein M. Efficacy of peer support interventions for  
17 depression: a meta-analysis. *Gen Hosp Psychiatry* 2011;33(1):29-36.  
18  
19 58. Chapin RK, Sergeant JF, Landry S, Leedahl SN, Rachlin R, Koenig T, et al. Reclaiming joy: pilot evaluation of a  
20 mental health peer support program for older adults who receive Medicaid. *The Gerontologist*  
21 2013;53(2):345-52.  
22  
23 59. Heisler M, Halasyamani L, Resnicow K, Neaton M, Shanahan J, Brown S, et al. "I am not alone": the feasibility  
24 and acceptability of interactive voice response-facilitated telephone peer support among older adults  
25 with heart failure. *Congest Heart Fail* 2007;13(3):149-57.  
26  
27 60. Age UK. Loneliness and Isolation Evidence Review. In: [http://www.ageuk.org.uk/professional-resources-](http://www.ageuk.org.uk/professional-resources-home/knowledge-hub-evidence-statistics/evidence-reviews/)  
28 [home/knowledge-hub-evidence-statistics/evidence-reviews/](http://www.ageuk.org.uk/professional-resources-home/knowledge-hub-evidence-statistics/evidence-reviews/), editor, 2010.  
29  
30 61. Effective discharge of older patients from the Emergency Department: Systematic Review and Meta-Analysis  
31 Australasian College of Emergency Medicine, ASM; 2014; Melbourne.  
32  
33 62. Rinaldi P, Mecocci P, Benedetti C, Ercolani S, Bregnocchi M, Menculini G, et al. Validation of the five-item  
34 geriatric depression scale in elderly subjects in three different settings. *J Am Geriatr Soc* 2003;51(5):694-  
35 8.  
36  
37 63. Hughes ME, Waite LJ, Hawkey LC, Cacioppo JT. A Short Scale for Measuring Loneliness in Large Surveys:  
38 Results From Two Population-Based Studies. *Research on aging* 2004;26(6):655-72.  
39  
40 64. Steptoe A, Shankar A, Demakakos P, Wardle J. Social isolation, loneliness, and all-cause mortality in older  
41 men and women. *Proceedings of the National Academy of Sciences of the United States of America*  
42 2013;110(15):5797-801.  
43  
44 65. Highet G, Crawford D, Murray SA, Boyd K. Development and evaluation of the Supportive and Palliative Care  
45 Indicators Tool (SPICT): a mixed-methods study. *BMJ supportive & palliative care* 2014;4(3):285-90.  
46  
47 66. Folstein MF, Folstein SE, McHugh PR. "Mini-Mental State: A Practical Method for Grading the Cognitive State  
48 of Patients for the Clinician. *J Psychiatric Research* 1975;12:189-98.  
49  
50 67. EuroQol G. EuroQol--a new facility for the measurement of health-related quality of life. *Health Policy*  
51 1990;16(3):199-208.  
52  
53 68. Dennis CL. The process of developing and implementing a telephone-based peer support program for  
54 postpartum depression: evidence from two randomized controlled trials. *Trials* 2014;15:131.  
55  
56 69. Chapin RK, Sergeant J, Landry ST, Leedahl SN, Rachlin R, Koenig T, et al. Reclaiming Joy: Pilot Evaluation of a  
57 Mental Health Peer Support Program for Older Adults Who Receive Medicaid. *The Gerontologist*  
58 2013;53(2):345-52.  
59  
60

- 1  
2  
3 70. World Medical Association. WMA Declaration of Helsinki - Ethical Principles for Medical Research Involving  
4 Human Subjects. In: WMA, editor. WMA General Assembly,:  
5 <http://www.wma.net/en/30publications/10policies/b3/>, 2013.  
6  
7 71. NHMRC. The Australian Code for the Responsible Conduct of Good Research.  
8 <http://www.nhmrc.gov.au/files/nhmrc/file/publications/synopses/r39.pdf>, 2007.  
9  
10 72. International Conference on Harmonisation. Guideline for Good Clinical Practice E6(R1). In: International  
11 Conference on Harmonisation of technical requirements for registration of pharmaceuticals for human  
12 use, editor. [http://www.ich.org/products/guidelines/efficacy/efficacy-single/article/good-clinical-](http://www.ich.org/products/guidelines/efficacy/efficacy-single/article/good-clinical-practice.html)  
13 [practice.html](http://www.ich.org/products/guidelines/efficacy/efficacy-single/article/good-clinical-practice.html), 1996.  
14  
15 73. Wheeler JA, KM G, Greenblatt B. The beneficial effects of volunteering for older volunteers and ht epeople  
16 they serve: a meta-analysis. *Int J Aging and Human Development* 1998;47(1):69-79.  
17  
18  
19  
20  
21  
22  
23  
24  
25  
26  
27  
28  
29  
30  
31  
32  
33  
34  
35  
36  
37  
38  
39  
40  
41  
42  
43  
44  
45  
46  
47  
48  
49  
50  
51  
52  
53  
54  
55  
56  
57  
58  
59  
60

# BMJ Open HOspitals and patients WoRking in Unity (HOW R U?): protocol for a prospective feasibility study of telephone peer support to improve older patients' quality of life after emergency department discharge

Judy A Lowthian,<sup>1</sup> Alyse Lennox,<sup>1</sup> Andrea Curtis,<sup>1</sup> Jeremy Dale,<sup>2</sup> Colette Browning,<sup>3,4,5</sup> De Villiers Smit,<sup>6</sup> Gillian Wilson,<sup>7</sup> Debra O'Brien,<sup>8</sup> Cate Rosewarne,<sup>9</sup> Lee Boyd,<sup>10</sup> Cath Garner,<sup>11</sup> Peter Cameron<sup>1,6</sup>

**To cite:** Lowthian JA, Lennox A, Curtis A, *et al*. HOspitals and patients WoRking in Unity (HOW R U?): protocol for a prospective feasibility study of telephone peer support to improve older patients' quality of life after emergency department discharge. *BMJ Open* 2016;**6**:e013179. doi:10.1136/bmjopen-2016-013179

► Prepublication history for this paper is available online. To view these files please visit the journal online (<http://dx.doi.org/10.1136/bmjopen-2016-013179>).

Received 24 June 2016  
Revised 10 November 2016  
Accepted 14 November 2016

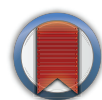

CrossMark

For numbered affiliations see end of article.

#### Correspondence to

Dr Judy Lowthian,  
Judy.Lowthian@monash.edu

## ABSTRACT

**Introduction:** Older people presenting to an emergency department (ED) have a higher likelihood of social isolation, loneliness and depression; which are all associated with negative health outcomes and increased health service use, including higher rates of ED attendance. The *HOW R U?* study aims to ascertain the feasibility and acceptability of a postdischarge telephone support programme for older ED patients following discharge. The intervention, which aims to improve quality of life, will be delivered by hospital-based volunteers.

**Methods and analysis:** A multicentre prospective uncontrolled feasibility study will enrol 50 community-dwelling patients aged  $\geq 70$  years with symptoms of loneliness or depression who are discharged home within 72 hours from the ED or acute medical ward. Participants will receive weekly supportive telephone calls over a 3-month period from a volunteer-peer. Feasibility will be assessed in terms of recruitment, acceptability of the intervention to participants and level of retention in the programme. Changes in level of loneliness (UCLA-3 item

Loneliness Scale), mood (Geriatric Depression Scale-5 item) and health-related quality of life (EQ-5D-5L and EQ-VAS) will also be measured postintervention (3 months).

**Ethics and dissemination:** Research ethics and governance committee approval has been granted for this study by each participating centre (reference: 432/15 and 12-09-11-15). Study findings will inform the design and conduct of a future multicentre randomised controlled trial of a postdischarge volunteer-peer telephone support programme to improve social isolation, loneliness or depressive symptoms in older patients. Results will be disseminated through peer-reviewed journal publication, and conference and seminar presentation.

**Trial registration number:** ACTRN12615000715572, Pre-results.

## Strengths and limitations of this study

- This is the first study to examine volunteer-peer telephone support for discharged older emergency patients.
- We will evaluate (1) feasibility of recruitment, delivery of the intervention and outcome measure ascertainment at study conclusion; (2) intervention acceptability and retention; and (3) changes in level of loneliness, depressive symptoms and quality of life.
- The feasibility study design is not powered to determine intervention effectiveness.
- Results will inform the design and conduct of a future multicentre randomised controlled trial of postdischarge volunteer-peer telephone support to improve health outcomes in older emergency patients.

## BACKGROUND

Older people aged  $\geq 70$  years are an ever-growing emergency department (ED) population, with attendances accelerating at a rate beyond that expected from demographic change alone.<sup>1 2</sup> They are the highest users of EDs,<sup>1 3</sup> are four times more likely to reattend within 12 months than those  $< 70$  years of age;<sup>3</sup> and more likely to be admitted to hospital.<sup>4</sup> This older ED population have a high likelihood of social isolation, loneliness, lack of social support<sup>5 6</sup> and depressive feelings.<sup>7 8</sup> Feeling depressed is associated with higher rates of ambulance use and ED attendance.<sup>9 10</sup> Social isolation is also associated with a fourfold to fivefold increase in the likelihood of representation and admission to hospital within 12 months.<sup>11</sup> In

1 addition, feeling sad or depressed is an independent  
 2 predictor of early and frequent reattendance to ED by  
 3 older patients, after controlling for medical history and  
 4 diagnosis.<sup>12</sup> This propensity to reattend must be  
 5 reduced, as an ED visit is described as a sentinel event  
 6 in older age,<sup>13</sup> with associated functional decline, admis-  
 7 sion to nursing care facilities and death in subsequent  
 8 months.<sup>6 14 15</sup>

9 Social isolation, loneliness and depressed mood are  
 10 distinct entities that are prevalent among older  
 11 community-dwellers, with research indicating that:

- ▶ seventeen per cent of older people have contact with family, friends or neighbours less than weekly, and 11% have contact less than monthly;<sup>16</sup>
- ▶ television is the main company for 40% of older people;<sup>17</sup>
- ▶ twelve per cent of the population aged  $\geq 65$  years feel socially isolated;<sup>18</sup>
- ▶ loneliness among older community dwellers is as high as 50% in the UK and Australia;<sup>19 20</sup>
- ▶ self-reported depression ranges from 6% to 20% in older Australian community-dwellers.<sup>21</sup>

22 These self-reported rates probably under-represent  
 23 true levels because of an associated stigma among older  
 24 people that such feelings are a character weakness, and  
 25 that 'one should be able to cope or pull themselves  
 26 together'.<sup>21</sup> Therefore, older patients who feel lonely or  
 27 depressed are highly likely not to be identified,<sup>22</sup> thus  
 28 reducing the opportunity for appropriate support being  
 29 implemented in the community.

31 Importantly, social isolation and loneliness are asso-  
 32 ciated with negative health outcomes and lower  
 33 health-related quality of life, as summarised in [box 1](#).<sup>23</sup>

### 35 A potential solution

36 HOspitals and patients WoRking in Unity (*HOWR U?*) is  
 37 a peer support programme for community-dwelling  
 38 older people with symptoms of depression, social isola-  
 39 tion or loneliness after discharge from the ED. The  
 40 intervention is innovative as it is delivered by hospital-  
 41 based volunteers over the telephone.

42 Peer support is the 'provision of knowledge, experience,  
 43 emotional or practical help by someone sharing common  
 44 characteristics'.<sup>35</sup> The social support model postulates that  
 45 social relationships promote health and well-being; thus,  
 46 peer support is hypothesised to reduce feelings of social  
 47 isolation and loneliness, thereby improving well-being.<sup>36</sup>  
 48 Peer support is usually provided by a person sharing  
 49 common characteristics, for example, age, gender, ethni-  
 50 city or experience of illness. Equivalent 'status' between  
 51 peer and patient is a feature of peer support that facili-  
 52 tates a high level of empathy delivered in a non-  
 53 confrontational manner.<sup>37</sup>

54 The telephone is increasingly used to deliver health-  
 55 care advice and support for patients. Most older people  
 56 have telephone access and are likely to accept  
 57 telephone-mediated peer support. Telephone-based  
 58 peer support can be a satisfactory substitute for

### Box 1 Health outcomes associated with social isolation, loneliness and depressive symptoms in older people

#### Social isolation and lack of social support

- ▶ Impact on early mortality is equivalent to smoking >15 cigarettes/day or being an alcoholic, with socially connected people 50% more likely to survive than those who are socially isolated (meta-analysis, 148 observational studies, N=308 849, mean age 64 years);<sup>24</sup>
- ▶ Excess risk of incident stroke in community-dwellers.<sup>25</sup>

#### Loneliness

- ▶ Increased risk of high blood pressure over a 4-year period;<sup>26</sup>
- ▶ Greater risk of cognitive decline and poorer cognitive function in older age<sup>27-29</sup> as well as a 64% increased chance of developing dementia;<sup>30</sup>
- ▶ Predictive of suicide in older age together with social isolation;<sup>31</sup>
- ▶ Predictor of functional decline and death.<sup>32</sup>

#### Depressive symptoms

- ▶ Increased risk of incident dementia;<sup>33</sup>
- ▶ Development of coronary heart disease and total mortality.<sup>34</sup>

face-to-face interaction, and many people prefer the relative anonymity and increased privacy of talking over the phone.<sup>38</sup> Evaluation of the UK *Call in Time* telephone befriending service for older people indicated a major impact on their quality of life.<sup>39</sup> Participants reported they felt a sense of belonging, valued knowing 'there's a friend out there' and that the service had a positive impact on their health and well-being, with increased self-confidence and alleviation of previous loneliness and anxiety.

42 Dale *et al's*<sup>37</sup> updated Cochrane Review investigated the effects of peer support telephone calls for improving physical, psychological, behavioural and other health outcomes in 14 randomised controlled trials (RCTs) involving 8040 participants. Positive results were found in eight studies, with peer support effective in reducing depressive symptoms in new mothers, supporting breast feeding, promoting mammography screening, improving diabetes outcomes and colonoscopy screening. Peer support programmes have also been shown to reduce healthcare service use by older people, including admissions to hospital, nursing care facility admissions and community doctor visits.<sup>40</sup>

48 Peers may be volunteers who are trained to support and listen, but not to give medical advice or judgement. Their non-medical status helps to overcome any reluctance that patients may have in discussing feelings of loneliness or isolation.<sup>41</sup> Hospital volunteers are trained to help support patients and families during an acute hospital admission or ED visit, which is a form of 'peer' support. With additional training and support, this volunteer role could be transferred beyond the hospital walls, to provide older patients with telephone peer support and social contact following discharge from the ED.

## OBJECTIVES

The current study will test the acceptability and feasibility of *HOW R U?*, an intervention designed to support older vulnerable patients after hospitalisation. We hypothesise that:

1. it is feasible to enrol older patients aged  $\geq 70$  years at the time of ED attendance, execute study procedures and measure functional outcomes in a multicentre observational study of a supportive volunteer-peer telephone intervention, to inform an RCT;
2. *HOW R U?* will be acceptable to patient and volunteer participants; and
3. there will be positive changes in the functional outcomes measured.

## METHODS AND ANALYSIS

### Study design and setting

*HOW R U?* is a pragmatic uncontrolled study testing the feasibility of a volunteer-peer telephone-support programme for older patients discharged from two EDs, short-stay units (SSUs) and acute medical wards (AMWs) at The Alfred and Cabrini Hospitals, both of which are large tertiary referral providers of healthcare that service public and private hospital patients in the inner south-eastern suburbs of Melbourne, Australia. Recruitment started at The Alfred in November 2015 and is ongoing at Cabrini until August 2016.

### Participants

Community-dwelling men and women aged  $\geq 70$  years will be recruited.

*Inclusion criteria:* Patients who screen positive for symptoms of social isolation, depression and/or loneliness using the Social Isolation Index ( $\text{SII} \geq 2$ ),<sup>35</sup> Geriatric Depression Scale-5 items ( $\text{GDS-5} \geq 2$ ),<sup>42</sup> and 3-item Loneliness Scale ( $\text{UCLA-3} \geq 6$ );<sup>43</sup> and are discharged home within 72 hours will be eligible for study inclusion.

*Exclusion criteria:* Patients will be excluded if they are triaged as category 1 level of urgency in ED; require surgery; live in a nursing care home; receive end-of-life care or are likely to be approaching end-of-life within 12 months using the Supportive Care and Palliative Care Indicators Tool criteria;<sup>44</sup> have moderate to severe cognitive impairment using the Mini-Mental State Examination ( $\text{MMSE} < 20$ ) or telephone version ( $\text{ALFI-MMSE} < 16$ ),<sup>45</sup> a confirmed diagnosis of dementia or severe mental illness such as schizophrenia or psychosis; or are unable or unwilling to communicate in English by telephone.

Determining eligibility for participation will be a multi-stage process, established by the recruitment staff during medical record review and review of the completed screening questionnaires. Rates of interest, eligibility and consent will be monitored to assess intervention uptake.

### Recruitment and consent

Recruitment will take place in the EDs, SSUs and AMWs during weekdays, 08:30–13:00. Study recruitment nurses

will liaise with ED allied health and nurse team leaders at the beginning of each shift to identify potential participants based on the inclusion criteria. Participants will not be approached until after their clinical needs have been addressed, as these must be respected first and foremost, over and above their participation in this study. Potential participants will be screened by the recruitment staff for social isolation, loneliness and depressed mood, as well as for cognitive impairment; and eligible patients will be invited to participate. Written informed consent will be sought at the time of recruitment and confirmed at the first volunteer telephone call to reduce drop-out during the study.

If potentially suitable patients have been discharged from the ED or AMW, recruitment nurses will follow them up by telephone, to discuss the project and seek interest in participation in order to optimise recruitment numbers. Consent to notify the general practitioner (GP) of involvement in the study will also be sought from the participant.

### Sample size

The study aims to establish the feasibility of recruitment, retention, assessment procedures, execution of the study protocol and testing intervention acceptability and adherence. A sample size of 50 participants across 2 hospital sites was selected, based on the pragmatics of recruitment and the necessities for examining feasibility.<sup>46</sup>

### Intervention

The *HOW R U?* intervention has been designed in consultation with potential consumers, hospital volunteers and clinicians. It comprises:

1. routine screening for social isolation, loneliness and/or depressive feelings in older users of the ED at the index ED attendance or hospital admission; followed by
2. weekly telephone support calls from a hospital volunteer (peer support person) for 3 months following ED and/or hospital discharge; and
3. referral to community-based services for ongoing support following the end of the study as needed.

An experienced older age hospital-based volunteer will be paired with a patient, matched by their preferred language. Patients will receive one telephone-support call every week over a 3-month period (up to 12 calls). The aim of the telephone calls is to provide emotional and social support. The first call will occur within 72 hours of discharge from ED, SSU or AMW.

The phone calls will focus on encouraging and supporting the patient and providing social stimulation and informal guidance about strategies that patients feel would improve their well-being, such as better self-care and/or social engagement with family, friends or community groups. Each call will be unstructured and patient-directed; however, the volunteer will ask the patient to describe any changes since the previous call,

1 the outcomes of any planned actions and agree on new  
2 social goals. This model has been used by social service  
3 providers for older people in the community with posi-  
4 tive outcomes,<sup>40</sup> but is yet to be trialled in a cohort fol-  
5 lowing hospital discharge.

6 The telephone calls will be conducted from the  
7 respective hospitals in an area allocated by the  
8 Volunteer Services Manager. *HOW R U?* volunteers will  
9 be provided with a summary of their participants' base-  
10 line data collection forms prior to conducting the first  
11 phone call.

12 In order to understand the impact of the various com-  
13 ponents of the intervention, telephone activity logs will  
14 be maintained by the volunteer for each participant.  
15 These logs will record the dates, times and length of  
16 each call, and the number of attempts required to make  
17 contact with the participant on each occasion. The  
18 content of the calls made will be described using a  
19 simple template. Participant drop-outs and their reasons  
20 for doing so will also be recorded on the activity log.

21 *Volunteer Training: HOW R U?* volunteer peers will be  
22 recruited from the hospital Volunteer Service. All volun-  
23 teers will have participated in their respective hospital-  
24 based volunteer training programme, which include  
25 workshops on confidentiality and privacy; rights and  
26 responsibilities in healthcare; professional and personal  
27 boundaries as a volunteer; emotions and responses;  
28 stress and self-care and communication and listening  
29 techniques. *HOW R U?* volunteers will be actively  
30 involved in the regular provision of in-hospital social and  
31 emotional support to acutely unwell patients and  
32 families.

33 At study initiation, the *HOW R U?* volunteers will  
34 attend a compulsory 4-hour project orientation session,  
35 including an overview of peer support; general informa-  
36 tion about mental health and ageing; expectations of  
37 their role; empathic listening techniques; policies and  
38 procedures; confidentiality and boundaries; risk manage-  
39 ment strategies and formal and informal community  
40 resources available to patients.

### 43 Safety considerations

44 It is not anticipated that *HOW R U?* will cause any spe-  
45 cific harm or discomfort. If participants wish to termi-  
46 nate an individual telephone call or cease their  
47 involvement in the study, they may do so at any time,  
48 without any interference to any care provided by their  
49 treating hospital.

50 If a volunteer is concerned about the physical or  
51 mental health of a participant, the volunteer will liaise  
52 directly with the relevant Emergency Physician  
53 Coinvestigator. The concern will then be triaged and the  
54 participant's GP may be contacted, as required.

55 Volunteers will have access to their respective  
56 Volunteer Services Manager and the Chief Investigator  
57 for advice and support throughout the study. A monthly  
58 meeting of volunteers with the Chief Investigator and

the Volunteer Services Managers will enable debriefing  
of any issues or concerns that arise.

*Care transition at study end:* Three main pathways have  
been developed for preparing participants for care tran-  
sition from the project. Discussions will start at week 8 of  
the 12-week intervention, or earlier as needed. Partic-  
ipants will either: continue the telephone support  
calls if a mutual agreement is reached between the  
patient and the volunteer; be referred and transferred  
to an alternative community support programme for  
support or cease telephone support calls. If any issues  
arise for participants or volunteers as a result of plan-  
ning the transition pathway, they will be referred to the  
Chief Investigator or their respective Volunteer Services  
Manager. If the participant would like to continue  
receiving calls from the volunteer but the volunteer has  
neither the time nor the inclination to continue, we will  
endeavour to find an alternative volunteer or arrange  
for continued support through a community-based  
agency.

### Data collection

Baseline data will be collected from the patient during  
the initial ED visit, either in the ED or AMW, or over the  
telephone within 48 hours of discharge. Recruitment  
staff will collect biosociodemographic details, including  
age, gender, contact details, marital status, residential  
status, carer status, GP status, GP contact details, pet  
ownership, use of health services within the previous  
12 months, current use of community services and  
comorbid health conditions. Standardised measurement  
instruments that demonstrate good psychometric prop-  
erties and are used in older community-dwelling patient  
research will be applied, including: Social Isolation  
Index;<sup>35</sup> UCLA—3-item Loneliness Scale;<sup>43</sup> Geriatric  
Depression Scale 5-item (GDS-5);<sup>42</sup> EQ-5D-5L, which  
measures perceived health-related quality of life in the  
dimensions of mobility, self-care, usual activities, pain/  
discomfort and anxiety/depression;<sup>47</sup> and the EQ visual  
analogue scale (EQ VAS), which is a visual analogue  
scale (0–100) measuring current health-related  
quality-of-life state.<sup>47</sup> All instruments have been validated  
for use over the telephone.

### Outcomes

Outcome data will be collected at 3 months after the  
initial ED presentation, via telephone by the Outcome  
Assessor. The primary outcomes are feasibility of study  
processes, and acceptability of the intervention to  
patient and volunteer participants.

This will include measurement of recruitment, assess-  
ment procedures, execution of the study protocol, how  
helpful the intervention was and the level of participa-  
tion and retention in the intervention. In-depth, semi-  
structured telephone interviews will be conducted at the  
end of the intervention, to enable patient participants to  
speak freely about their experiences and perceptions. A  
topic guide based on the Peer Support Evaluation



Inventory<sup>48</sup> will be used to provide prompts of key issues for exploration, including participants' experience of calls and their value, views about the programme, benefits of the programme and suggestions to enhance the effectiveness of *HOWRU?*

Two focus groups will be conducted with volunteer peers at the end of the intervention to allow the opportunity for interaction between volunteer peers to explore their experiences and perceptions. A topic guide based on the Peer Volunteer Experience Questionnaire<sup>48</sup> will be used to provide prompts of key issues for exploration, including the experience of delivering the intervention, the impact of helping the participants on their own emotional well-being and their views about what might be needed to enhance the effectiveness of *HOWRU?*

Secondary outcomes include measurement of changes in perceived social isolation, level of loneliness, depressive symptoms and quality of life as measured by the SII, UCLA-3-item Loneliness Scale, GDS-5, EQ-5D-5L and EQ VAS, after completion of the intervention.

### Data management

All data collected at baseline and during the 3-month outcome assessment telephone call will be recorded on a data collection form and will be labelled with a project-specific ID for each participant. The privacy of individuals is of paramount importance, and all identifiers will be removed prior to the data being analysed in an aggregated form. A telephone activity log will be maintained by the volunteers for each telephone call. Random audits of the telephone calls and the activity logs will ensure fidelity of the intervention and that a standard approach is being used. Following electronic data entry, a random selection of 10% of the data collection form and telephone activity log paper-based copies will be reviewed, to monitor data entry accuracy.

### Analysis

Feasibility of conducting study processes will be assessed, including the volunteer-peer training programme and materials, eligibility screening and recruitment strategies, telephone call regime, risk management procedures and level of support required by the volunteers.

Intervention acceptability to patients and volunteers will be measured through rates of uptake by eligible patients, and retention in the intervention; alongside patient and volunteer feedback interviews which will consider acceptability from the perspectives of the volunteer and patient participants. Interview data will be analysed using a qualitative thematic framework approach.<sup>49</sup> Data will be systematically scrutinised, charted and sorted into recurrent themes. Patterns and connections within the data will be highlighted in order to develop a framework of themes which will then be applied to the data. Commonalities and variations within and between participant groups (patient and volunteer participants) will be explored. Two researchers will perform the

analysis independently, prior to discussing the emerging framework.

Preintervention and postintervention scores of social isolation, mood, loneliness and health-related quality of life will be analysed using paired t-tests to compare any differences with a significance level of  $p=0.05$ .

The study findings will inform the design and conduct of a future multicentre RCT of a postdischarge volunteer-peer telephone support programme to improve social isolation, loneliness or depressive symptoms in older patients.

### DISSEMINATION

The study Steering Committee will provide overall trial supervision. Written informed consent will be sought from all participants for their participation and the publication of the results. Confidentiality is of paramount importance, and the volunteer-peer supporters are bound by hospital guidelines to maintain professional behaviour, with adherence to patient confidentiality regulations at all times. Participants will be reminded that they are free to withdraw at any time, and that their data will be stored securely and anonymously. All data will be stored on a secure password-protected university server and archived for 7 years after study completion. The results will be disseminated through peer-reviewed journal publication, and conference and seminar presentation, whereby it will not be possible to identify participants.

### DISCUSSION

Older people are a significant proportion of ED attendances.<sup>1-3</sup> Many lack social support and have symptoms of loneliness, social isolation and/or depression;<sup>6 50 51</sup> all of which are associated with negative health outcomes, functional decline, institutionalisation, mortality and increased hospital use.<sup>7 11 23 52</sup> Furthermore, with population ageing, it is likely that the number of older people at risk of social isolation and loneliness will continue to grow, as will their rates of ED use.

Social isolation, loneliness and depressive symptoms are not routinely screened for during ED attendances or short hospital admissions other than in research settings. Targeted management of older people suffering from social isolation, loneliness or depressive symptoms is effective with improving symptoms.<sup>52</sup> Therefore, systematic identification of social isolation, loneliness or depressive symptoms at the time of ED attendance alongside postdischarge support should help combat the associated negative consequences, and diminish this important public health and individual burden.

This paper describes the protocol for a pragmatic, observational study to examine the feasibility and acceptability of providing volunteer-peer telephone support for this vulnerable population. Our overarching hypothesis is that volunteer-peer telephone-support will help reduce symptoms of social isolation, loneliness and

**Figure 1** Hypothesised effects of HOW R U?

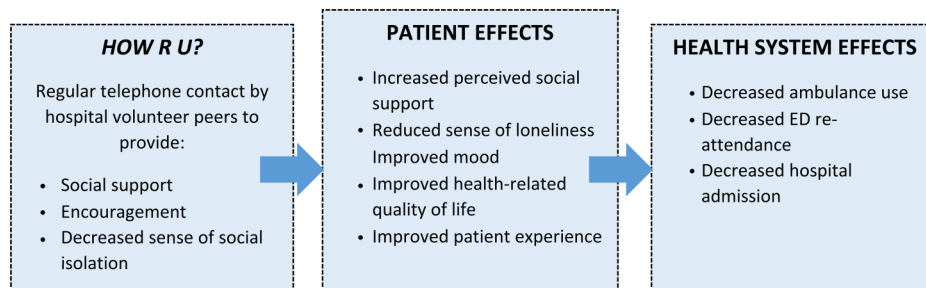

depressive feelings, through an improvement in mood and quality of life; and these effects will be associated with a reduction in the rate of return ED visits and hospital readmissions (figure 1).

*HOW R U?* has the potential to improve quality of life for older people in the community. It will also raise awareness of mental health issues in older people by GPs, health workers and family, and help redirect older people with symptoms of depression, loneliness and social isolation to appropriate services in a timely way. This will facilitate closer relationships between hospitals and their communities. Secondary benefits include the positive effects that the act of meaningful volunteering has on the peer supporter; with a positive correlation between volunteering and perceived health, and a negative correlation to depression in older volunteers.<sup>53</sup> Volunteers represent a significant adjunct resource for meeting some of the health and social care service needs of our more vulnerable older population; as well as being inexpensive, which is an important consideration, given the financial constraints of health systems across the world.

The quantitative and qualitative findings of this feasibility study will be used to inform further development of the *HOW R U?* intervention and its mode of delivery, as well the design and development of a future RCT and programme evaluation, which will test the effectiveness of *HOW R U?* compared with usual care in improving quality of life, through improvement of symptoms of depression, social isolation and loneliness; and in reducing reattendances and hospitalisations.

#### Author affiliations

<sup>1</sup>School of Public Health and Preventive Medicine, Monash University, Melbourne, Victoria, Australia

<sup>2</sup>Warwick Medical School, University of Warwick, Coventry, UK

<sup>3</sup>RDNS Institute, RDNS, Melbourne, Victoria, Australia

<sup>4</sup>International Institute for Primary Health Care Research, Shenzhen, China

<sup>5</sup>School of Primary Health Care, Monash University, Melbourne, Victoria, Australia

<sup>6</sup>Emergency and Trauma Centre, Alfred Health, Melbourne, Victoria, Australia

<sup>7</sup>Volunteer Services, Alfred Health, Melbourne, Victoria, Australia

<sup>8</sup>Emergency Department, Cabrini Health, Malvern, Victoria, Australia

<sup>9</sup>Volunteer Services, Cabrini Health, Malvern, Victoria, Australia

<sup>10</sup>Nursing Services, Cabrini Institute, Cabrini Health, Malvern, Victoria, Australia

<sup>11</sup>Department of Mission and Strategy, Cabrini Health, Malvern, Victoria,

**Contributors** JAL conceived and developed the study protocol. JD and CB provided expertise with design of the intervention. All authors contributed to

refinement of the study protocol. AL and JAL drafted the manuscript, and all authors approved the final manuscript.

**Funding** This work was supported by a grant from the Monash Partners Academic Health Science Centre.

**Competing interests** None declared.

**Patient consent** Obtained.

**Ethics approval** Alfred Health (432/15), Cabrini Health (12-09-11-15) and Monash University (CF15/4468-2015001934).

**Provenance and peer review** Not commissioned; externally peer reviewed.

**Open Access** This is an Open Access article distributed in accordance with the Creative Commons Attribution Non Commercial (CC BY-NC 4.0) license, which permits others to distribute, remix, adapt, build upon this work non-commercially, and license their derivative works on different terms, provided the original work is properly cited and the use is non-commercial. See: <http://creativecommons.org/licenses/by-nc/4.0/>

#### REFERENCES

- Lowthian JA, Curtis AJ, Jolley DJ, *et al*. Demand at the emergency department front door: 10-year trends in presentations. *Med J Aust* 2012;196:128–32.
- Lowthian JA, Jolley DJ, Curtis AJ, *et al*. The challenges of population ageing: accelerating demand for emergency ambulance services by older patients, 1995–2015. *Med J Aust* 2011;194:574–8.
- Lowthian JA, Curtis AJ, Stoelwinder JU, *et al*. Emergency demand and repeat attendances by older patients. *Intern Med J* 2013;43:554–60.
- Lowthian JA, Stoelwinder JU, McNeil JJ, *et al*. Is the increase in emergency short-stay admissions sustainable? Trends across Melbourne, 2000 to 2009. *Emerg Med Australas* 2012;24:610–16.
- Lowthian JA, Curtis AJ, Cameron PA, *et al*. Systematic review of trends in emergency department attendances: an Australian perspective. *Emerg Med J* 2011;28:373–7.
- Aminzadeh F, Dalziel WB. Older adults in the emergency department: a systematic review of patterns of use, adverse outcomes, and effectiveness of interventions. *Ann Emerg Med* 2002;39:238–47.
- Choi NG, Marti CN, Bruce ML, *et al*. Relationship between depressive symptom severity and emergency department use among low-income, depressed homebound older adults aged 50 years and older. *BMC Psychiatry* 2012;12:233.
- Geller J, Janson P, McGovern E, *et al*. Loneliness as a predictor of hospital emergency department use. *J Fam Pract* 1999;48:801–4.
- Shah MN, Jones CM, Richardson TM, *et al*. Prevalence of depression and cognitive impairment in older adult emergency medical services patients. *Prehosp Emerg Care* 2011;15:4–11.
- Rotenberg Y, Jacobs JM, Stessman J. Depression and health service utilization from age 70 to 85: the Jerusalem Longitudinal Study. *J Am Med Dir Assoc* 2013;14:711.e1–6.
- Mistry R, Rosansky J, McGuire J, *et al*. Social isolation predicts re-hospitalization in a group of older American veterans enrolled in the UPBEAT Program. Unified Psychogeriatric Biopsychosocial Evaluation and Treatment. *Int J Geriatr Psychiatry* 2001;16:950–9.
- McCusker J, Cardin S, Bellavance F, *et al*. Return to the emergency department among elders: patterns and predictors. *Acad Emerg Med* 2000;7:249–59.

13. Sanders AB, Witzke D, Jones JS, *et al*. Principles of care and application of the geriatric emergency care model. In: Sanders AB, ed. *Emergency care of the elder person*. St Louis: Beverly Cramcom Publications, 1996:59–93.
14. Hastings SN, Schmader KE, Sloane RJ, *et al*. Adverse health outcomes after discharge from the emergency department—incidence and risk factors in a veteran population. *J Gen Intern Med* 2007;22:1527–31.
15. McCusker J, Healey E, Bellavance F, *et al*. Predictors of repeat emergency department visits by elders. *Acad Emerg Med* 1997;4:581–8.
16. Victor C, Scrambler S, Bond J, *et al*. Being alone in later life: loneliness, social isolation and living alone. *Rev Clin Gerontol* 2000;10:407–17.
17. Age UK. Later Life in the United Kingdom, January 2015 London. <http://www.ageuk.org.uk/professional-resources-home/www.ageuk.org.uk/> (accessed June 2015).
18. Windle K, Francis J, Coomber C. *Preventing loneliness and social isolation: interventions and outcomes*. London: Social Care Institute for Excellence, 2011.
19. Office for National Statistics. *Measuring national well-being—older people and loneliness, 2013*. London: Office for National Statistics, 2013.
20. Franklin A, Tranter B. *Loneliness in Australia*. Housing and Community Research Unit—University of Tasmania, 2008.
21. National Ageing Research Institute. *Beyondblue depression in older age: a scoping study*. NARI, 2009.
22. Unutzer J, Katon W, Callahan CM, *et al*. Depression treatment in a sample of 1,801 depressed older adults in primary care. *J Am Geriatr Soc* 2003;51:505–14.
23. Hawton A, Green C, Dickens AP, *et al*. The impact of social isolation on the health status and health-related quality of life of older people. *Qual Life Res* 2011;20:57–67.
24. Holt-Lunstad J, Smith TB, Layton JB. Social relationships and mortality risk: a meta-analytic review. *PLoS Med* 2010;7:e1000316.
25. Nagayoshi M, Everson-Rose SA, Iso H, *et al*. Social network, social support, and risk of incident stroke: Atherosclerosis Risk in Communities study. *Stroke* 2014;45:2868–73.
26. Hawkey LC, Thisted RA, Masi CM, *et al*. Loneliness predicts increased blood pressure: 5-year cross-lagged analyses in middle-aged and older adults. *Psychol Aging* 2010;25:132–41.
27. James BD, Wilson RS, Barnes LL, *et al*. Late-life social activity and cognitive decline in old age. *J Int Neuropsychol Soc* 2011;17:998–1005.
28. Shankar A, Hamer M, McMunn A, *et al*. Social isolation and loneliness: relationships with cognitive function during 4 years of follow-up in the English Longitudinal Study of Ageing. *Psychosom Med* 2013;75:161–70.
29. O’Lunaigh C, O’Connell H, Chin AV, *et al*. Loneliness and cognition in older people: the Dublin Healthy Ageing study. *Aging Ment Health* 2012;16:347–52.
30. Holwerda TJ, Deeg DJ, Beekman AT, *et al*. Feelings of loneliness, but not social isolation, predict dementia onset: results from the Amsterdam Study of the Elderly (AMSTEL). *J Neurol Neurosurg Psychiatr* 2014;85:135–42.
31. O’Connell H, Chin AV, Cunningham C, *et al*. Recent developments: suicide in older people. *BMJ* 2004;329:895–9.
32. Perissinotto CM, Stijacic Cenzer I, Covinsky KE. Loneliness in older persons: a predictor of functional decline and death. *Arch Intern Med* 2012;172:1078–83.
33. Dinitz BS, Butters MA, Albert SM, *et al*. Late-life depression and risk of vascular dementia and Alzheimer’s disease: systematic review and meta-analysis of community-based cohort studies. *Br J Psychiatry* 2013;202:329–35.
34. Ariyo AA, Haan M, Tangen CM, *et al*. Depressive symptoms and risks of coronary heart disease and mortality in elderly Americans. Cardiovascular Health Study Collaborative Research Group. *Circulation* 2000;102:1773–9.
35. Steptoe A, Shankar A, Demakakos P, *et al*. Social isolation, loneliness, and all-cause mortality in older men and women. *Proc Natl Acad Sci USA* 2013;110:5797–801.
36. Paul G, Smith SM, Whitford D, *et al*. Development of a complex intervention to test the effectiveness of peer support in type 2 diabetes. *BMC Health Serv Res* 2007;7:136.
37. Dale J, Caramlau IO, Lindenmeyer A, *et al*. *Peer support telephone calls for improving health (Review)*. The Cochrane Collaboration, 2009.
38. Heisler M, Halasyamani L, Resnicow K, *et al*. ‘I am not alone’: the feasibility and acceptability of interactive voice response-facilitated telephone peer support among older adults with heart failure. *Congest Heart Fail* 2007;13:149–57.
39. Cattan M, Kime N, Bagnall AM. Low-level support for socially isolated older people—an evaluation of telephone befriending. In: Age UK, ed. *Call in Time*. London: Help the Aged, 2009:31–44.
40. Chapin RK, Sergeant JF, Landry S, *et al*. Reclaiming joy: pilot evaluation of a mental health peer support program for older adults who receive Medicaid. *Gerontologist* 2013;53:345–52.
41. Dale J, Caramlau I, Sturt J, *et al*. Telephone peer-delivered intervention for diabetes motivation and support: the telecare exploratory RCT. *Patient Educ Couns* 2009;75:91–8.
42. Rinaldi P, Mecocci P, Benedetti C, *et al*. Validation of the five-item geriatric depression scale in elderly subjects in three different settings. *J Am Geriatr Soc* 2003;51:694–8.
43. Hughes ME, Waite LJ, Hawkey LC, *et al*. A short scale for measuring loneliness in large surveys: results from two population-based studies. *Res Aging* 2004;26:655–72.
44. Highet G, Crawford D, Murray SA, *et al*. Development and evaluation of the Supportive and Palliative Care Indicators Tool (SPICT): a mixed-methods study. *BMJ Support Palliat Care* 2014;4:285–90.
45. Folstein MF, Folstein SE, McHugh PR. Mini-Mental State: a practical method for grading the cognitive state of patients for the clinician. *J Psychiatr Res* 1975;12:189–98.
46. Leon AC, Davis LL, Kraemer HC. The role and interpretation of pilot studies in clinical research. *J Psychiatr Res* 2011;45:626–9.
47. EuroQol Group. EuroQol—a new facility for the measurement of health-related quality of life. *Health Policy* 1990;16:199–208.
48. Dennis CL. The process of developing and implementing a telephone-based peer support program for postpartum depression: evidence from two randomized controlled trials. *Trials* 2014;15:131.
49. Ritchie J, Spencer L. Qualitative data analysis for applied policy research. In: Bryman A, Burgess RG, eds. *Analyzing qualitative data*. London: Routledge, 1994:173–94.
50. Molloy GJ, McGee HM, O’Neill D, *et al*. Loneliness and emergency and planned hospitalizations in a community sample of older adults. *J Am Geriatr Soc* 2010;58:1538–41.
51. Coe RM, Wolinsky FD, Miller DK, *et al*. Elderly persons without family support networks and use of health services: a follow-up report on social network relationships. *Res Aging* 1985;7:617–22.
52. Dickens AP, Richards SH, Greaves CJ, *et al*. Interventions targeting social isolation in older people: a systematic review. *BMC Public Health* 2011;11:647.
53. Wheeler JA, KM G, Greenblatt B. The beneficial effects of volunteering for older volunteers and the people they serve: a meta-analysis. *Int J Aging Hum Dev* 1998;47:69–79.

BMJ Open

# HOspitals and patients WoRking in Unity (HOW R U?): protocol for a prospective feasibility study of telephone peer support to improve older patients' quality of life after emergency department discharge

Judy A Lowthian, Alyse Lennox, Andrea Curtis, Jeremy Dale, Colette Browning, De Villiers Smit, Gillian Wilson, Debra O'Brien, Cate Rosewarne, Lee Boyd, Cath Garner and Peter Cameron

BMJ Open 2016 6:  
doi: 10.1136/bmjopen-2016-013179

---

Updated information and services can be found at:  
<http://bmjopen.bmj.com/content/6/12/e013179>

---

*These include:*

## References

This article cites 44 articles, 13 of which you can access for free at:  
<http://bmjopen.bmj.com/content/6/12/e013179#BIBL>

## Open Access

This is an Open Access article distributed in accordance with the Creative Commons Attribution Non Commercial (CC BY-NC 4.0) license, which permits others to distribute, remix, adapt, build upon this work non-commercially, and license their derivative works on different terms, provided the original work is properly cited and the use is non-commercial. See: <http://creativecommons.org/licenses/by-nc/4.0/>

## Email alerting service

Receive free email alerts when new articles cite this article. Sign up in the box at the top right corner of the online article.

---

## Topic Collections

Articles on similar topics can be found in the following collections

[Emergency medicine](#) (242)  
[Geriatric medicine](#) (241)  
[Health services research](#) (1214)

---

## Notes

---

To request permissions go to:  
<http://group.bmj.com/group/rights-licensing/permissions>

To order reprints go to:  
<http://journals.bmj.com/cgi/reprintform>

To subscribe to BMJ go to:  
<http://group.bmj.com/subscribe/>

**STROBE 2007 (v4) Statement—Checklist of items that should be included in reports of cohort studies**

Hospitals and patients Working in Unity (HOWRU?):  
telephone peer support to improve older patients' quality of life after emergency department discharge – a feasibility study

| Section/Topic                | Item # | Recommendation                                                                                                                                                                       | Reported on page # |
|------------------------------|--------|--------------------------------------------------------------------------------------------------------------------------------------------------------------------------------------|--------------------|
| Title and abstract           | 1      | (a) Indicate the study's design with a commonly used term in the title or the abstract                                                                                               | 4                  |
|                              |        | (b) Provide in the abstract an informative and balanced summary of what was done and what was found                                                                                  | 4                  |
| <b>Introduction</b>          |        |                                                                                                                                                                                      |                    |
| Background/rationale         | 2      | Explain the scientific background and rationale for the investigation being reported                                                                                                 | 5                  |
| Objectives                   | 3      | State specific objectives, including any prespecified hypotheses                                                                                                                     | 6                  |
| <b>Methods</b>               |        |                                                                                                                                                                                      |                    |
| Study design                 | 4      | Present key elements of study design early in the paper                                                                                                                              | 6                  |
| Setting                      | 5      | Describe the setting, locations, and relevant dates, including periods of recruitment, exposure, follow-up, and data collection                                                      | 6                  |
| Participants                 | 6      | (a) Give the eligibility criteria, and the sources and methods of selection of participants. Describe methods of follow-up                                                           | 6                  |
|                              |        | (b) For matched studies, give matching criteria and number of exposed and unexposed                                                                                                  | -                  |
| Variables                    | 7      | Clearly define all outcomes, exposures, predictors, potential confounders, and effect modifiers. Give diagnostic criteria, if applicable                                             | 7                  |
| Data sources/<br>measurement | 8*     | For each variable of interest, give sources of data and details of methods of assessment (measurement). Describe comparability of assessment methods if there is more than one group | 6-7                |
| Bias                         | 9      | Describe any efforts to address potential sources of bias                                                                                                                            | -                  |
| Study size                   | 10     | Explain how the study size was arrived at                                                                                                                                            | 6                  |
| Quantitative variables       | 11     | Explain how quantitative variables were handled in the analyses. If applicable, describe which groupings were chosen and why                                                         | 7                  |
| Statistical methods          | 12     | (a) Describe all statistical methods, including those used to control for confounding                                                                                                | 7                  |
|                              |        | (b) Describe any methods used to examine subgroups and interactions                                                                                                                  | -                  |
|                              |        | (c) Explain how missing data were addressed                                                                                                                                          | -                  |
|                              |        | (d) If applicable, explain how loss to follow-up was addressed                                                                                                                       | -                  |
|                              |        | (e) Describe any sensitivity analyses                                                                                                                                                | -                  |

**STROBE 2007 (v4) Statement—Checklist of items that should be included in reports of *cohort studies***

| <b>Results</b>           |     |                                                                                                                                                                                                              |   |
|--------------------------|-----|--------------------------------------------------------------------------------------------------------------------------------------------------------------------------------------------------------------|---|
| Participants             | 13* | (a) Report numbers of individuals at each stage of study—eg numbers potentially eligible, examined for eligibility, confirmed eligible, included in the study, completing follow-up, and analysed            | 7 |
|                          |     | (b) Give reasons for non-participation at each stage                                                                                                                                                         | - |
|                          |     | (c) Consider use of a flow diagram                                                                                                                                                                           | - |
| Descriptive data         | 14* | (a) Give characteristics of study participants (eg demographic, clinical, social) and information on exposures and potential confounders                                                                     | 7 |
|                          |     | (b) Indicate number of participants with missing data for each variable of interest                                                                                                                          | 8 |
|                          |     | (c) Summarise follow-up time (eg, average and total amount)                                                                                                                                                  | 8 |
| Outcome data             | 15* | Report numbers of outcome events or summary measures over time                                                                                                                                               | 8 |
| Main results             | 16  | (a) Give unadjusted estimates and, if applicable, confounder-adjusted estimates and their precision (eg, 95% confidence interval). Make clear which confounders were adjusted for and why they were included | 8 |
|                          |     | (b) Report category boundaries when continuous variables were categorized                                                                                                                                    | - |
|                          |     | (c) If relevant, consider translating estimates of relative risk into absolute risk for a meaningful time period                                                                                             | - |
| Other analyses           | 17  | Report other analyses done—eg analyses of subgroups and interactions, and sensitivity analyses                                                                                                               | - |
| <b>Discussion</b>        |     |                                                                                                                                                                                                              |   |
| Key results              | 18  | Summarise key results with reference to study objectives                                                                                                                                                     | 8 |
| <b>Limitations</b>       | 19  | Discuss limitations of the study, taking into account sources of potential bias or imprecision.                                                                                                              | 5 |
| Interpretation           | 20  | Give a cautious overall interpretation of results considering objectives, limitations, multiplicity of analyses, results from similar studies, and other relevant evidence                                   | 8 |
| Generalisability         | 21  | Discuss the generalisability (external validity) of the study results                                                                                                                                        | 9 |
| <b>Other information</b> |     |                                                                                                                                                                                                              |   |
| Funding                  | 22  | Give the source of funding and the role of the funders for the present study and, if applicable, for the original study on which the present article is based                                                | 3 |

\*Give information separately for cases and controls in case-control studies and, if applicable, for exposed and unexposed groups in cohort and cross-sectional studies.

**Note:** An Explanation and Elaboration article discusses each checklist item and gives methodological background and published examples of transparent reporting. The STROBE checklist is best used in conjunction with this article (freely available on the Web sites of PLoS Medicine at <http://www.plosmedicine.org/>, Annals of Internal Medicine at <http://www.annals.org/>, and Epidemiology at <http://www.epidem.com/>). Information on the STROBE Initiative is available at [www.strobe-statement.org](http://www.strobe-statement.org).

# BMJ Open

## Hospitals and patients Working in Unity (HOW R U?): telephone peer support to improve older patients' quality of life after emergency department discharge in Melbourne, Australia – a multicentre prospective mixed methods feasibility study

|                                 |                                                                                                                                                                                                                                                                                                                                                                                                                                                                                                                                                                                                                                                                                                                                                                                                                                 |
|---------------------------------|---------------------------------------------------------------------------------------------------------------------------------------------------------------------------------------------------------------------------------------------------------------------------------------------------------------------------------------------------------------------------------------------------------------------------------------------------------------------------------------------------------------------------------------------------------------------------------------------------------------------------------------------------------------------------------------------------------------------------------------------------------------------------------------------------------------------------------|
| Journal:                        | <i>BMJ Open</i>                                                                                                                                                                                                                                                                                                                                                                                                                                                                                                                                                                                                                                                                                                                                                                                                                 |
| Manuscript ID                   | bmjopen-2017-020321.R1                                                                                                                                                                                                                                                                                                                                                                                                                                                                                                                                                                                                                                                                                                                                                                                                          |
| Article Type:                   | Research                                                                                                                                                                                                                                                                                                                                                                                                                                                                                                                                                                                                                                                                                                                                                                                                                        |
| Date Submitted by the Author:   | 24-Feb-2018                                                                                                                                                                                                                                                                                                                                                                                                                                                                                                                                                                                                                                                                                                                                                                                                                     |
| Complete List of Authors:       | Lowthian, Judy; Monash University, School of Public Health & Preventive Medicine<br>Lennox, Alyse; Monash University, School of Public Health & Preventive Medicine<br>Curtis, Andrea; Monash University, School of Public Health & Preventive Medicine<br>Wilson, Gillian; Alfred Health, Volunteer Services<br>Rosewarne, Cate; Cabrini Hospital, Volunteer Services<br>Smit, De Villiers; Alfred Health, Emergency & Trauma Centre<br>O'Brien, Debra; Epworth, Medical Services<br>Browning, Colette; Australian National University<br>Boyd, Lee; Cabrini Hospital, Nursing Services & Cabrini Institute<br>Smith, Cathie; Alfred Health, Emergency & Trauma Centre<br>Cameron, Peter; Monash University, Department of Epidemiology and Preventive Medicine<br>Dale, Jeremy; University of Warwick, Warwick Medical School |
| <b>Primary Subject Heading</b>: | Health services research                                                                                                                                                                                                                                                                                                                                                                                                                                                                                                                                                                                                                                                                                                                                                                                                        |
| Secondary Subject Heading:      | Geriatric medicine, Emergency medicine, Patient-centred medicine                                                                                                                                                                                                                                                                                                                                                                                                                                                                                                                                                                                                                                                                                                                                                                |
| Keywords:                       | post-discharge, gerontology, social isolation, volunteer-peer, telephone-support                                                                                                                                                                                                                                                                                                                                                                                                                                                                                                                                                                                                                                                                                                                                                |
|                                 |                                                                                                                                                                                                                                                                                                                                                                                                                                                                                                                                                                                                                                                                                                                                                                                                                                 |

SCHOLARONE™  
Manuscripts

## TITLE PAGE

**HOspitals and patients WoRking in Unity (*HOW R U?*): telephone peer support to improve older patients' quality of life after emergency department discharge in Melbourne, Australia – a multicentre prospective feasibility study**

1. **Dr Judy A Lowthian** **Corresponding Author**  
School of Public Health and Preventive Medicine, Monash University  
Level 3, 553 St Kilda Road, Melbourne, 3004, Australia  
[Judy.Lowthian@monash.edu](mailto:Judy.Lowthian@monash.edu)  
T: +61 412 116571  
  
Bolton Clarke Research Institute, Bolton Clarke,  
31 Alma Road, St Kilda, 3182, Australia  
[jlowthian@boltonclarke.com.au](mailto:jlowthian@boltonclarke.com.au)  
T: +61 412 116571
2. Ms Alyse Lennox  
School of Public Health and Preventive Medicine, Monash University  
Level 3, 553 St Kilda Rd, Melbourne, 3004, Australia  
[Alyse.Lennox@monash.edu](mailto:Alyse.Lennox@monash.edu)  
T: +61 3 9903 0320
3. Dr Andrea Curtis  
School of Public Health and Preventive Medicine, Monash University  
Level 6 Alfred Centre, 99 Commercial Road, Melbourne, 3004, Australia  
[Andrea.Curtis@monash.edu](mailto:Andrea.Curtis@monash.edu)  
T: +61 3 9903 0171
4. Mrs Gillian Wilson  
Volunteer Services, Alfred Health,  
55 Commercial Road, Melbourne, 3004, Australia  
[G.Wilson@alfred.org.au](mailto:G.Wilson@alfred.org.au)  
T: +61 3 9076 2970
5. Mrs Cate Rosewarne  
Volunteer Services, Cabrini Health,  
183 Wattletree Road, Malvern, Australia  
[crosewarne@cabrini.com.au](mailto:crosewarne@cabrini.com.au)  
T: +61 3 9508 3470



## Manuscript ID bmjopen-2017-020321.R1

- 1  
2  
3 6. Dr De Villiers Smit  
4 Emergency and Trauma Centre, Alfred Health,  
5 55 Commercial Road, Melbourne, 3004, Australia  
6 Melbourne, Australia  
7 [d.smit@alfred.org.au](mailto:d.smit@alfred.org.au)  
8 T: +61 3 9076 2782  
9  
10
- 11 7. Dr Debra O'Brien  
12 Epworth Hospital,  
13 89 Bridge Road, Richmond, Australia  
14 [debra.obrien@epworth.org.au](mailto:debra.obrien@epworth.org.au)  
15 T: +61 3 9426 6666  
16  
17
- 18 8. Professor Colette Browning  
19 Shenzhen International Institute for Primary Health Care Research, Shenzhen, China  
20 Australian National University, Canberra Australia  
21 Monash University, Wellington Road, Melbourne, Australia  
22 [colette.browning@monash.edu](mailto:colette.browning@monash.edu)  
23 T: +61 448 708 090  
24  
25
- 26 9. Associate Professor Lee Boyd  
27 Nursing Services and Cabrini Institute, Cabrini Health,  
28 154 Wattletree Road, Malvern, Australia  
29 [lboyd@cabrini.com.au](mailto:lboyd@cabrini.com.au)  
30 T: +61 3 9508 3470  
31  
32
- 33 10. Ms Cathie Smith  
34 Senior Social Worker/ ED Allied Health Team Leader, Patient + Family Services  
35 Alfred Health,  
36 55 Commercial Road, Melbourne, Australia  
37 [Cathie.Smith@alfred.org.au](mailto:Cathie.Smith@alfred.org.au)  
38 T: +61 3 9076 3405  
39  
40
- 41 11. Professor Peter Cameron  
42 School of Public Health and Preventive Medicine, Monash University  
43 Level 3, 553 St Kilda Rd, Melbourne, 3004, Australia  
44  
45 Emergency and Trauma Centre, Alfred Health,  
46 55 Commercial Road, Melbourne, Australia  
47 [Peter.Cameron@monash.edu](mailto:Peter.Cameron@monash.edu)  
48 T: +61 455 753 792  
49  
50  
51  
52  
53  
54  
55  
56  
57  
58  
59  
60

1  
2  
3  
4 12. Professor Jeremy Dale  
5 Warwick Medical School, University of Warwick,  
6 Coventry, CV4 7AL, United Kingdom  
7 [Jeremy.Dale@warwick.ac.uk](mailto:Jeremy.Dale@warwick.ac.uk)  
8  
9 T: 024 7652 2891  
10  
11  
12  
13

#### 14 **Keywords**

- 16 • gerontology
- 17 • social isolation
- 18 • volunteer-peer
- 19 • telephone-support
- 20
- 21
- 22

#### 23 **Author Contributions:**

24 JL conceived, developed the study protocol, and obtained funding for the study. JD and CB  
25 provided expertise to help design of the intervention. JL, AL, AC, GW, CR, DS, DO, LB, CS, PC,  
26 JD and CB contributed to refinement of the study protocol. JL, AL, AC, GW, CR, DS, DO, LB,  
27 CS, PC, JD and CB contributed to the acquisition, analysis, or interpretation of data. JL  
28 drafted the manuscript. JL, AL, AC, GW, CR, DS, DO, LB, CS, PC, JD and CB helped review and  
29 revise it critically for intellectual content, and approved the final version to be published. JL,  
30 AL, AC, GW, CR, DS, DO, LB, CS, PC, JD and CB agree to be accountable for all aspects of the  
31 work in ensuring that questions related to the accuracy or integrity of any part of the work  
32 are appropriately investigated and resolved.  
33  
34

35 **Funding:** This work was supported by a grant from the Monash Partners Academic Health  
36 Science Centre.  
37

38 **Competing interests:** None declared.  
39

40 **Patient consent:** Obtained.  
41

42 **Ethics approval:** Alfred Health (432/15), Cabrini Health (12-09-11-15) and Monash  
43 University (CF15/4468-2015001934)  
44  
45

46 **Provenance and peer review:** Not commissioned; externally peer reviewed.  
47

48 **Data sharing Statement:** There are no additional unpublished data for this study.  
49  
50

51 **Word Count:** 1938 words  
52  
53  
54  
55  
56  
57  
58  
59  
60

## Manuscript ID bmjopen-2017-020321.R1

1  
2  
3 **HOSpitals and patients WoRking in Unity (*HOW R U?*): telephone peer support to improve**  
4 **older patients' quality of life after emergency department discharge in Melbourne,**  
5 **Australia – a multicentre prospective feasibility study**  
6

7 **ABSTRACT**

8  
9  
10 **Objectives:** To ascertain the feasibility and acceptability of the *HOW R U?* program, a novel  
11 volunteer-peer post-discharge support program for older patients after discharge from the  
12 emergency department (ED).  
13

14  
15 **Design:** A multicentre prospective mixed methods feasibility study.  
16

17 **Setting:** Two tertiary hospital EDs in metropolitan Melbourne, Australia.  
18

19 **Participants:** A convenience sample of 39 discharged ED patients aged 70 years or over, with  
20 symptoms of social isolation, loneliness and/or depression.  
21

22 **Intervention:** The *HOW R U?* intervention comprised weekly social support telephone calls  
23 delivered by volunteer peers for 3 months following ED discharge.  
24  
25

26 **Primary and secondary outcome measures:** The primary outcomes were feasibility of study  
27 processes, intervention acceptability to participants, and retention in the program.  
28 Secondary outcomes were changes in loneliness level (UCLA-3 item Loneliness Scale), mood  
29 (GDS-5 item) and health-related quality of life (EQ-5D-5L and EQ-VAS) post-intervention.  
30  
31

32 **Results:** Recruitment was feasible, with 30% of eligible patients successfully recruited.  
33 Seventeen volunteer peers provided telephone support to patient participants, in addition  
34 to their usual hospital volunteer role. *HOW R U?* was well received, with 87% retention in  
35 the patient group, and no attrition in the volunteer group.  
36  
37

38  
39 The median age of patients was 84 years, 64% were female, and 82% lived alone. Sixty-eight  
40 percent of patients experienced reductions in depressive symptoms, and 53% experiencing  
41 reduced feelings of loneliness, and these differences were statistically significant. Patient  
42 feedback was positive and volunteers reported great satisfaction with their new role.  
43  
44

45 **Conclusion:** *HOW R U?* was feasible in terms of recruitment and retention and was  
46 acceptable to both patients and volunteers. The overall results support the potential for  
47 further research in this area, and provide data to support the design of a definitive trial to  
48 confirm the observed effects.  
49  
50

51 **Trial registration:** <http://www.anzctr.org.au> ACTRN12615000715572  
52  
53  
54  
55  
56  
57  
58  
59  
60

### Strengths and limitations of this study

- This is the first feasibility study of a hospital volunteer-delivered telephone service to support older people with symptoms of social isolation, loneliness and/or depression after discharge from the emergency department.
- Recruitment and retention rates support the feasibility of the intervention.
- Reductions in loneliness and depressive symptoms support further research to test the intervention in a definitive trial.
- This was a relatively small cohort study, hence a randomised controlled trial is required to confirm the observed effects.

## INTRODUCTION

Older people presenting to Emergency Departments (EDs) and hospitals have a higher likelihood of social isolation, loneliness and depression<sup>1-3</sup>; all of which are associated with negative health outcomes, functional decline, institutionalisation, mortality and increased hospital use.<sup>4-9</sup>

These risk factors for increased hospital use and poor health outcomes are not routinely screened for during ED attendances or short hospital admissions other than in the research setting. Despite this, ED attendances represent an opportunity to identify older patients who are at risk of further negative health outcomes and increased acute health service use. Targeted management of older people suffering from social isolation, loneliness or depressive symptoms has been shown to be effective in reducing symptoms.<sup>5</sup> It is highly probable that systematic identification of isolation, loneliness and depressive symptoms at the time of ED attendance, with post-discharge support, will help combat these negative consequences and diminish this important public and individual health burden.

Peer support is the *'provision of knowledge, experience, emotional or practical help by someone sharing common characteristics'*<sup>11</sup>. Peer support can be used with patients transitioning from hospital to home to enhance quality of life. This definition falls within the social support model, and postulates that social relationships promote health and well-being; thus peer support is hypothesised to reduce feelings of social isolation and loneliness, thereby improving well-being<sup>10</sup>.

Peer support is provided by a person sharing common characteristics (e.g. age, gender, socio-economic status, ethnicity, or experience of acute illness and hospitalisation). Equivalent 'status' between peer and patient is a feature of peer support that facilitates a high level of empathy delivered in a non-confrontational manner<sup>11</sup>. Peers may be hospital volunteers who are trained to support and listen, but not to give medical advice or

**Manuscript ID bmjopen-2017-020321.R1**

1  
2  
3 judgement. This non-medical status helps overcome any reluctance that patients may have  
4 in discussing feelings of loneliness or isolation; thus helping to bridge the gap between  
5 patients and health professionals<sup>12 13</sup>. Peer support can be delivered via home visits, group  
6 meetings or telephone calls.  
7

8  
9 The aim of this study was to test the feasibility and acceptability of *HOspitals and patients*  
10 *WoRking in Unity (HOW R U?)*, a post-discharge, telephone peer support intervention  
11 delivered by hospital volunteers to older community-dwelling patients with feelings of social  
12 isolation, loneliness, or depression. If the intervention is feasible and acceptable, the  
13 findings will inform design and conduct of a randomised controlled trial and program  
14 evaluation.  
15

**METHODS****Patient and Public Involvement statement**

16  
17  
18  
19  
20  
21  
22 This study was informed by comments received from patient participants in the Safe Elderly  
23 Emergency Discharge (SEED) project. SEED mapped the demographic, clinical, functional and  
24 psychosocial profiles of a large cohort (n=959) of older ED patients. The cohort was followed  
25 up by telephone over a 6 months' period after discharge home, to determine the risk factors  
26 associated with adverse outcomes.<sup>8 9</sup> Many patients reported how much they looked  
27 forward to the follow-up calls, with requests for more frequent calls; highlighting their  
28 feelings of isolation and loneliness. This led to development of our hypothesis that  
29 telephone support could reduce feelings of social isolation, loneliness and depression.  
30 Potential patients and hospital-based volunteers were involved in the development of the  
31 *HOW R U?* intervention; with volunteers directly involved as research partners in all aspects  
32 of the study (GW, CR). Hospital-based volunteers were involved in conduct of this study,  
33 including development and publication of the study protocol and this manuscript.<sup>14 14</sup>  
34 Patients from the current feasibility and acceptability study have been involved in  
35 refinement of study processes and of the intervention for the planned RCT.  
36  
37  
38  
39  
40

**Design, setting and participants**

41  
42  
43 This was a pragmatic prospective mixed methods feasibility study conducted with a cohort  
44 of patients following discharge home from the EDs of two tertiary hospitals. The Alfred and  
45 Cabrini Hospitals provide public and private healthcare in metropolitan Melbourne,  
46 respectively. Participants were community-dwelling patients aged 70 years or more, who  
47 attended The Alfred ED between November 2015 and March 2016; and Cabrini ED between  
48 March and July 2016; and were discharged home from the ED, short-stay observation unit  
49 or acute medical ward within 72 hours of arrival. Patients were recruited on weekdays  
50 throughout the study period by research nurses. All participants gave written informed  
51 consent. The study was registered at <http://www.anzctr.org.au>, registry number  
52 ACTRN12615000715572.  
53  
54  
55  
56  
57  
58  
59  
60

1  
2  
3 Eligible patients had symptoms of social isolation, loneliness and/or depression using the  
4 Social Isolation Index (SII $\geq$ 3),<sup>15</sup> 3-item Loneliness Scale (UCLA-3 $\geq$ 6),<sup>16</sup> and Geriatric  
5 Depression Scale – 5 item (GDS-5 $\geq$ 2)<sup>17</sup>.  
6

7 Patients were excluded if they were triaged as category 1 level of urgency on the  
8 Australasian Triage Scale; required surgery; lived in an aged care facility; were receiving end-  
9 of-life care; had a confirmed diagnosis of dementia or severe mental illness such as  
10 psychosis or schizophrenia; had a moderate-severe cognitive impairment using the Mini-  
11 Mental State Examination (MMSE $<$ 20);<sup>18</sup> or were unable or unwilling to communicate by  
12 telephone.  
13  
14  
15

### 16 **Sample size**

17  
18 A sample size of 50 participants across the two sites was nominated, to examine feasibility  
19 of study processes and intervention acceptability.  
20

### 21 **HOW R U? intervention**

22  
23 The intervention, volunteer peer training program and risk management strategies were  
24 described in full in the published study protocol.<sup>19</sup> In summary, *HOW R U?* comprised:  
25

- 26 • screening by research nurses for feelings of social isolation, loneliness and  
27 depression at the time of hospital attendance using the SII [14], UCLA-3 [15] and  
28 GDS-5 [16];
- 29 • peer support delivered by a trained hospital volunteer through weekly telephone  
30 calls, within 72 hours of discharge home, for up to 3 months; and
- 31 • referral for ongoing support by community-based services as required at study end.  
32  
33  
34

### 35 **Data collection**

36  
37 As per the published study protocol paper,<sup>19</sup> bio-sociodemographic and health and social  
38 care services use data were collected, alongside measurement of social isolation (SII) [14],  
39 loneliness (UCLA-3) [15], depressive symptoms (GDS-5) [16], and health-related quality of  
40 life (EQ-5D-5L and EQ VAS)<sup>20</sup> at the time of hospital attendance and at the 3 months study  
41 end point. The primary outcomes were feasibility and acceptability.  
42  
43

44 Feasibility of study processes including recruitment and retention in the program were  
45 assessed using study records. 39 patient experience interviews were conducted at the  
46 conclusion of follow-up data collection to determine the acceptability of the intervention.  
47 These interviews were undertaken using a topic guide based on the Peer Support Evaluation  
48 Inventory<sup>21</sup>. Questions explored participants' perceptions about the frequency and length  
49 of the calls, the modality of the intervention, their matched volunteer peers, the level of  
50 support provided, and their satisfaction with the overall experience. Fidelity of the  
51 intervention delivery was determined by reviewing the weekly telephone activity logs  
52 maintained by the volunteer peers, and also through observation of a proportion of peer  
53  
54  
55  
56  
57  
58  
59  
60

**Manuscript ID bmjopen-2017-020321.R1**

1  
2  
3 support calls. Secondary outcomes were any measurable changes in levels of perceived  
4 social isolation, loneliness, depressive symptoms and quality of life.  
5

**Analysis**

6  
7  
8 Acceptability of the intervention by the target patient population was measured by the rate  
9 of recruitment and retention in the intervention, and also through analysis of the qualitative  
10 interviews. Transcripts were loaded into NVivo (Version 11, QSR International, Doncaster,  
11 Victoria) for data management and analysed using a qualitative thematic framework  
12 approach<sup>22</sup>. This involved familiarisation with the data and derivation of a framework by  
13 noticing concepts within the data and developing themes and sub-themes. Quotes were  
14 sorted into categories, which formed the final thematic framework. Data were mapped and  
15 interpreted and the framework was applied back to the dataset to ensure all quotes were  
16 appropriately organised whilst retaining links to the original data. Two researchers were  
17 involved in the development of the framework and resolved differences in opinion through  
18 discussion.  
19  
20  
21  
22

23 Acceptability to volunteer peers was measured using retention rates and feedback obtained  
24 in focus groups. Volunteer perceptions are the focus of a separate manuscript.  
25

26 Social isolation, loneliness, depressive symptoms and health-related quality of life scores  
27 were compared before and after the intervention, using paired t-tests with a significance  
28 level of  $p=0.05$ .  
29  
30  
31  
32

**RESULTS**

33  
34 This study enabled us to develop all study resources, materials and training programs; test  
35 the feasibility of study processes; and determine acceptability of the intervention to  
36 patients and volunteers. We recruited 17 volunteer peers and a convenience sample of 39  
37 patient participants. Volunteers were all aged over 50 years and 69% were women. The  
38 median age of patient participants was 84 years, 64% were women, and 84% of participants  
39 lived alone. Patient participant baseline demographic characteristics are summarised in  
40 Table 1.  
41  
42  
43  
44

**Feasibility of study processes**

45  
46  
47 Volunteers were invited by their Hospital Volunteer Services Manager to participate in the  
48 study. All volunteer participants attended a half-day *HOW R U?* peer support training  
49 program, conducted at their respective hospital. Feedback about the first hospital's *HOW R*  
50 *U?* orientation / training program and resources enabled refinement prior to the second  
51 hospital's session.  
52  
53

54 Recruitment processes in the ED, including eligibility screening, were feasible, with 30% of  
55 eligible patients successfully enlisted across the two sites.  
56  
57  
58  
59

### Intervention acceptability and fidelity

The intervention was feasible and acceptable from the volunteers' point of view, with most able to take on 3 participants in addition to their usual hospital volunteer roles. There was no volunteer attrition over the study period. The average number of telephone calls per participant was 8 calls (range 1 – 12 calls), with an average call length of 24 minutes (range 1-60 minutes). Weekly monitoring of telephone activity logs indicated intervention fidelity, with 100% completion rate of the activity log sheets including documentation of the main focus of and topics discussed in each call; agreed social goals for the following week; patient-reported changes since the previous call; and volunteer-peer impression of the participant's emotional state/feelings during each call. All volunteers adhered to the risk management procedures in accordance with the study protocol, with one volunteer reporting concern about a single patient participant to the hospital emergency physician coinvestigator. All volunteers reported that the level of support provided by their Volunteer Service Manager, and the research team was appropriate, .

The intervention was acceptable to patient participants, with 34 completing the program, representing an 87% retention rate. Three main themes were identified in the qualitative data as follows:

#### *Study processes were acceptable to participants*

While some participants missed a few calls due to last-minute medical appointments and unexpected visitors, the fact that participants agreed upon the call time the week prior meant that receiving peer support calls was convenient for them. Participants were satisfied with the individually-determined length of their phone calls, with one expressing that *'having someone to talk to for 5-10 minutes is good'* (P13) while others were happy to talk for much longer. Similarly, while some participants would have liked to receive more calls at the conclusion of the intervention, most participants were satisfied with the length of the program. Some also commented on the frequency of the calls and believed that *'once a week was a good amount of calls'* (P17). In terms of the modality of the intervention, while a couple of participants *'would have liked face-to-face'* (P36) support, most *'liked the convenience of telephone support'* (P1). One participant stated that *'telephone calls are a good way to receive social support without having to go out'* (P2). Another participant liked receiving telephone support because *'even though they knew the voice, the anonymity was good'* (P19).

#### *Supportive relationships developed between participants and volunteer peers*

Most participants reported that their volunteer peers were supportive and understanding. One participant stated that they *'felt they could confide in their volunteer'* (P21), while another mentioned that they *'could talk about things that they couldn't talk about with other people'* (P35). Participants reported finding common interests with their volunteer peer in order to build rapport and topics discussed included sport, poetry, films, music,



## Manuscript ID bmjopen-2017-020321.R1

1  
2  
3 cooking and politics. Furthermore, some participants reported '*becoming quite good friends*'  
4 (P4) with their volunteer and '*looking forward to the calls*' (P15), demonstrating that it was  
5 feasible for participants to develop a supportive relationship with a volunteer in this  
6 timeframe.  
7

### 8 *HOW R U? is addressing a need*

9  
10 A number of participants commented on the potential for *HOW R U?* to fill a need for  
11 '*people who are really isolated*' (P23). One participant suggested that '*after discharge is*  
12 '*when something like this is really helpful, especially if you're on your own*' (P5). Another  
13 participant mentioned that '*it is empowering to have someone to talk to when you are down*  
14 '*and know that you are not alone*' (P26). Overall, participants acknowledged that taking an  
15 interest in people who may be socially isolated, lonely or showing symptoms of depression  
16 can really make a difference.  
17  
18  
19

### 20 **Secondary outcomes**

21  
22 At the end of the 3-months study, it was observed that:

- 23  
24 • 53% of participants experienced a reduction in the level of loneliness:  
25 pre- and post- mean *UCLA 3-item* scores (standard deviation, SD) 5.76 (SD 1.84) and  
26 4.59 (SD 1.62), respectively ( $t=3.32, p=0.002$ );
- 27  
28 • 68% of participants experienced fewer depressive symptoms:  
29 pre- and post- mean *GDS 5-item* scores 2.15 (SD 1.21) and 1.03 (SD,1.22),  
30 respectively ( $t=4.77, p=0.000$ )
- 31  
32 • while 59% of participants experienced an increase in health-related quality of life, the  
33 difference between mean *EQ VAS* scores pre- and post- intervention was not significant:  
34 pre- and post- mean *EQ VAS* scores 57.85 (SD 26.02) and 65.44 (SD=20.13),  
35 respectively ( $t=-1.58, p=0.124$ )  
36  
37

### 38 **DISCUSSION**

39  
40 This is the first study of a hospital volunteer-delivered telephone service designed to  
41 support discharged older emergency patients with symptoms of social isolation, loneliness  
42 and/or depression. This study indicated that *HOW R U?* was feasible and acceptable to  
43 patients and volunteers. Our results also suggested that a hospital volunteer-delivered  
44 telephone service might reduce levels of loneliness and symptoms of depression in this  
45 patient group. A limitation was that this was a relatively small cohort study in two  
46 metropolitan hospital EDs; and it was not powered for these secondary outcomes. Hence  
47 further research with a comparative controlled trial is required to confirm the observed  
48 effects..  
49  
50  
51

52  
53 The overall 30% recruitment rate was reassuring, given the challenges associated with acute  
54 illness or injury and the fast-paced nature of the ED environment;<sup>23</sup> as well as the  
55 recognised stigma with seeking or receiving support in older populations.<sup>24</sup> Recruitment  
56  
57  
58

1  
2  
3 sessions were limited to 4.5hour time periods, due to resource constraints for this feasibility  
4 study. The target of 25 patients was met at the Alfred, however recruitment was  
5 terminated early at Cabrini due to the majority of older patients being admitted for time  
6 periods greater than 72 hours.  
7

8  
9 The rate of patient retention in *HOW R U?* was promising, possibly in part due to the  
10 targeted cohort's characteristics, the supportive non-intrusive nature of the intervention  
11 which enabled relative anonymity and increased privacy over the phone,<sup>25</sup> and  
12 commencement within 72 hours of discharge.  
13

14  
15 The positive feedback was encouraging, and is in common with that reported by the UK *Call*  
16 *in Time* telephone 'befriending' service for older people. Evaluation of this service indicated  
17 a major impact on quality of life, with participants reporting that they felt a sense of  
18 belonging, that life was worth living and they valued knowing that '*there's a friend out*  
19 *there*'.<sup>26</sup> This resonates with comments received from *HOW R U?* participants.  
20  
21

22  
23 Social isolation, loneliness and depressed mood are prevalent amongst older people living in  
24 the community, with 12% feeling socially isolated;<sup>27</sup> 50% reporting loneliness;<sup>28 29</sup> and  
25 depressive feelings in up to 20%.<sup>30</sup> Self-reported rates probably *under-represent* true levels  
26 because of an associated stigma amongst older people.<sup>30</sup> Therefore older patients with  
27 loneliness or depressive feelings are highly likely not to be identified,<sup>31</sup> reducing the  
28 opportunity for appropriate support to be implemented in the community.  
29

30  
31 Older people presenting to ED are at an increased risk of feeling socially isolated, lonely or  
32 depressed,<sup>32</sup> which are associated with increased re-attendance<sup>33</sup> and negative health  
33 outcomes such as early mortality, suicide, dementia and stroke.<sup>34</sup> These consequences have  
34 far-reaching public health impacts in terms of reduced quality of life and increased hospital  
35 use. Furthermore, with population ageing, it is likely that the number of older people at risk  
36 of social isolation and loneliness will continue to grow, as will their rates of ED use. The ED  
37 visit provides an opportunity to systematically identify social isolation, loneliness or  
38 depressive symptoms. If proven effective, implementation of peer support through *HOW R*  
39 *U?* should help combat the associated deleterious consequences, thereby diminishing this  
40 important public health and individual burden.  
41  
42  
43

44  
45 *HOW R U?* has the potential to reduce symptoms of depression, loneliness and social  
46 isolation amongst vulnerable older people, as well as improve quality of life. Volunteers  
47 represent a significant adjunct resource for meeting some of the health and social care  
48 service needs of our more vulnerable older population. Additional benefits include the  
49 positive effects that the act of meaningful volunteering has on the peer supporter, including  
50 a positive correlation between volunteering and perceived health, and a negative  
51 correlation with depression in older volunteers<sup>35</sup>. Maintenance of an effective high quality  
52 volunteer service requires professional staff to coordinate and manage recruitment, training,  
53 and the provision of day-to-day supervision, support and oversight; however the use of  
54 volunteers in hospitals has been shown to be cost-effective alongside increased levels of  
55  
56  
57  
58  
59  
60

**Manuscript ID bmjopen-2017-020321.R1**

1  
2  
3 patient satisfaction <sup>36</sup>. Our qualitative and quantitative findings will now inform the design  
4 of a future randomised controlled trial and program evaluation.  
5  
6  
7  
8  
9  
10  
11  
12  
13  
14  
15  
16  
17  
18  
19  
20  
21  
22  
23  
24  
25  
26  
27  
28  
29  
30  
31  
32  
33  
34  
35  
36  
37  
38  
39  
40  
41  
42  
43  
44  
45  
46  
47  
48  
49  
50  
51  
52  
53  
54  
55  
56  
57  
58  
59  
60

For peer review only

## REFERENCES

1. Aminzadeh F, Dalziel WB. Older adults in the emergency department: a systematic review of patterns of use, adverse outcomes, and effectiveness of interventions. *Ann Emerg Med* 2002;**39**(3):238-47.
2. Molloy GJ, McGee HM, O'Neill D, et al. Loneliness and emergency and planned hospitalizations in a community sample of older adults. *J Am Geriatr Soc* 2010;**58**(8):1538-41.
3. Coe RM, Wolinsky FD, Miller DK, et al. Elderly persons without family support networks and use of health services: a follow-up report on social network relationships. *Research on Aging* 1985;**7**(4):617-22.
4. Hawton A, Green C, Dickens AP, et al. The impact of social isolation on the health status and health-related quality of life of older people. *Qual Life Res* 2010;**20**(1):57-67.
5. Dickens AP, Richards SH, Greaves CJ, et al. Interventions targeting social isolation in older people: a systematic review. *BMC Public Health* 2011;**11**:647.
6. Choi NG, Marti CN, Bruce ML, et al. Relationship between depressive symptom severity and emergency department use among low-income, depressed homebound older adults aged 50 years and older. *BMC Psychiatry* 2012;**12**:233.
7. Mistry R, Rosansky J, McGuire J, et al. Social isolation predicts re-hospitalization in a group of older American veterans enrolled in the UPBEAT Program. *Unified Psychogeriatric Biopsychosocial Evaluation and Treatment. Int J Geriatr Psychiatry* 2001;**16**(10):950-9.
8. Lowthian J, Straney LD, Brand CA, et al. Unplanned early return to the emergency department by older patients: the Safe Elderly Emergency Department Discharge (SEED) project. *Age Ageing* 2016;**45**(2):255-61.
9. Lowthian JA, Straney LD, Brand CA, et al. Predicting functional decline in older emergency patients-the Safe Elderly Emergency Discharge (SEED) project. *Age Ageing* 2017;**46**(2):219-25.
10. Paul G, Smith SM, Whitford D, et al. Development of a complex intervention to test the effectiveness of peer support in type 2 diabetes. *BMC Health Serv Res* 2007;**7**:136.
11. Dale J, Caramlau IO, Lindenmeyer A, et al. Peer support telephone calls for improving health (Review). *The Cochrane Collaboration* 2009.
12. Dale J, Caramlau IO, Lindenmeyer A, et al. Peer support telephone calls for improving health. *Cochrane Database Syst Rev* 2008(4):CD006903.
13. Dale J, Caramlau I, Sturt J, et al. Telephone peer-delivered intervention for diabetes motivation and support: the telecare exploratory RCT. *Patient Educ Couns* 2009;**75**(1):91-8.
14. Lowthian JA, Lennox A, Curtis A, et al. HOspitals and patients WoRking in Unity (HOW R U?): protocol for a prospective feasibility study of telephone peer support to improve older patients' quality of life after emergency department discharge. *BMJ Open* 2016;**6**(12).
15. Steptoe A, Shankar A, Demakakos P, et al. Social isolation, loneliness, and all-cause mortality in older men and women. *Proc Natl Acad Sci U S A* 2013;**110**(15):5797-801.
16. Hughes ME, Waite LJ, Hawkey LC, et al. A Short Scale for Measuring Loneliness in Large Surveys: Results From Two Population-Based Studies. *Res Aging* 2004;**26**(6):655-72.
17. Rinaldi P, Mecocci P, Benedetti C, et al. Validation of the five-item geriatric depression scale in elderly subjects in three different settings. *J Am Geriatr Soc* 2003;**51**(5):694-8.
18. Folstein MF, Folstein SE, McHugh PR. "Mini-Mental State: A Practical Method for Grading the Cognitive State of Patients for the Clinician. *J Psychiatric Research* 1975;**12**:189-98.
19. Lowthian JA, Lennox A, Curtis A, et al. HOspitals and patients WoRking in Unity (HOW R U?): protocol for a prospective feasibility study of telephone peer support to improve older patients' quality of life after emergency department discharge. *BMJ open* 2016;**6**(12):e013179.
20. EuroQol Group. EuroQol - a new facility for the measurement of health-related quality of life. *Health Policy* 1990;**16**:199-208.

## Manuscript ID bmjopen-2017-020321.R1

21. Dennis CL. The process of developing and implementing a telephone-based peer support program for postpartum depression: evidence from two randomized controlled trials. *Trials* 2014;**15**(1):131.
22. Ritchie J, Spencer L. Qualitative data analysis for applied policy research. In: Bryman A, R B, eds. *Analyzing qualitative data*. London: Routledge, 1994:173-94.
23. Kendrick D, Lyons R, Christie N, et al. Recruiting participants for injury studies in emergency departments. *Injury Prevention* 2007;**13**(2):75-7.
24. National Ageing Research Institute. *beyondblue depression in older age: a scoping study*. Final Report. In: NARI., ed., 2009.
25. Heisler M, Halasyamani L, Resnicow K, et al. "I am not alone": the feasibility and acceptability of interactive voice response-facilitated telephone peer support among older adults with heart failure. *Congestive heart failure* 2007;**13**(3):149-57.
26. Cattan M, Kime N, Bagnall AM. Low-level support for socially isolated older people - An evaluation of telephone befriending. In: Age UK, ed. *Call in Time*. London: Help the Aged,, 2009.
27. Windle K, Francis J, Coomber C. Preventing loneliness and social isolation: interventions and outcomes. In: Social Care Institute for Excellence, ed. London, 2011.
28. Office for National Statistics. *Measuring National Well-being - Older people and loneliness*, 2013. In: office for National Statistics, ed. London, 2013.
29. Franklin A, Tranter B. *Loneliness in Australia*. In: Housing and Community Research Unit - University of Tasmania, ed., 2008.
30. National Ageing Research Institute. *beyondblue depression in older age: a scoping study*. In: NARI, ed., 2009.
31. Unutzer J, Katon W, Callahan CM, et al. Depression treatment in a sample of 1,801 depressed older adults in primary care. *J Am Geriatr Soc* 2003;**51**(4):505-14.
32. Lowthian JA, Curtis AJ, Cameron PA, et al. Systematic review of trends in emergency department attendances: an Australian perspective. *Emerg Med J* 2011;**28**(5):373-7.
33. Rottenberg Y, Jacobs JM, Stessman J. Depression and health service utilization from age 70 to 85: the Jerusalem Longitudinal Study. *J Am Med Dir Assoc* 2013;**14**(9):711 e1-6.
34. Holt-Lunstad J, Smith TB, Layton JB. Social relationships and mortality risk: a meta-analytic review. *PLoS medicine* 2010;**7**(7):e1000316.
35. Wheeler JA, KM G, Greenblatt B. The beneficial effects of volunteering for older volunteers and ht epeople they serve: a meta-analysis. *Int J Aging and Human Development* 1998;**47**(1):69-79.
36. Hotchkiss RB, Fottler MD, Unruh L. Valuing volunteers: the impact of volunteerism on hospital performance. *Health Care Manage Review* 2009;**34**(2):119-28.

**Table 1: *HOW R U?* participant baseline demographic characteristics**

|                                                            | N=39        |
|------------------------------------------------------------|-------------|
| Age (years) median (range)                                 | 84 (70-100) |
| Sex                                                        |             |
| Female                                                     | 64%         |
| Cultural background                                        |             |
| Australian born                                            | 77%         |
| Living status                                              |             |
| Living alone                                               | 82%         |
| Formal/informal care in place                              | 44%         |
| Regular social group attendance                            | 53%         |
| Feelings of social isolation ( <sup>*</sup> SII $\geq 2$ ) | 82%         |
| Feelings of loneliness ( <sup>^</sup> UCLA-3 $\geq 6$ )    | 65%         |
| Depressive symptoms ( <sup>#</sup> GDS-5 $\geq 2$ )        | 77%         |
| Self-rated health: EQ-VAS (average)                        | 59.6        |

**Legend**

<sup>\*</sup> SII Social Isolation Index; <sup>^</sup> UCLA-3 3-item Loneliness Scale; <sup>#</sup> GDS-5 Geriatric Depression Scale – 5 item

**STROBE 2007 (v4) Statement—Checklist of items that should be included in reports of *cohort studies***

Hospitals and patients Working in Unity (HOWRU?):  
telephone peer support to improve older patients' quality of life after emergency department discharge – a feasibility study

| Section/Topic                | Item # | Recommendation                                                                                                                                                                       | Reported on page # |
|------------------------------|--------|--------------------------------------------------------------------------------------------------------------------------------------------------------------------------------------|--------------------|
| Title and abstract           | 1      | (a) Indicate the study's design with a commonly used term in the title or the abstract                                                                                               | 4                  |
|                              |        | (b) Provide in the abstract an informative and balanced summary of what was done and what was found                                                                                  | 4                  |
| <b>Introduction</b>          |        |                                                                                                                                                                                      |                    |
| Background/rationale         | 2      | Explain the scientific background and rationale for the investigation being reported                                                                                                 | 5                  |
| Objectives                   | 3      | State specific objectives, including any prespecified hypotheses                                                                                                                     | 6                  |
| <b>Methods</b>               |        |                                                                                                                                                                                      |                    |
| Study design                 | 4      | Present key elements of study design early in the paper                                                                                                                              | 6                  |
| Setting                      | 5      | Describe the setting, locations, and relevant dates, including periods of recruitment, exposure, follow-up, and data collection                                                      | 6                  |
| Participants                 | 6      | (a) Give the eligibility criteria, and the sources and methods of selection of participants. Describe methods of follow-up                                                           | 6                  |
|                              |        | (b) For matched studies, give matching criteria and number of exposed and unexposed                                                                                                  | -                  |
| Variables                    | 7      | Clearly define all outcomes, exposures, predictors, potential confounders, and effect modifiers. Give diagnostic criteria, if applicable                                             | 7                  |
| Data sources/<br>measurement | 8*     | For each variable of interest, give sources of data and details of methods of assessment (measurement). Describe comparability of assessment methods if there is more than one group | 6-7                |
| Bias                         | 9      | Describe any efforts to address potential sources of bias                                                                                                                            | -                  |
| Study size                   | 10     | Explain how the study size was arrived at                                                                                                                                            | 6                  |
| Quantitative variables       | 11     | Explain how quantitative variables were handled in the analyses. If applicable, describe which groupings were chosen and why                                                         | 7                  |
| Statistical methods          | 12     | (a) Describe all statistical methods, including those used to control for confounding                                                                                                | 7                  |
|                              |        | (b) Describe any methods used to examine subgroups and interactions                                                                                                                  | -                  |
|                              |        | (c) Explain how missing data were addressed                                                                                                                                          | -                  |
|                              |        | (d) If applicable, explain how loss to follow-up was addressed                                                                                                                       | -                  |
|                              |        | (e) Describe any sensitivity analyses                                                                                                                                                | -                  |

**STROBE 2007 (v4) Statement—Checklist of items that should be included in reports of *cohort studies***

|                          |     |                                                                                                                                                                                                              |   |
|--------------------------|-----|--------------------------------------------------------------------------------------------------------------------------------------------------------------------------------------------------------------|---|
| <b>Results</b>           |     |                                                                                                                                                                                                              |   |
| Participants             | 13* | (a) Report numbers of individuals at each stage of study—eg numbers potentially eligible, examined for eligibility, confirmed eligible, included in the study, completing follow-up, and analysed            | 7 |
|                          |     | (b) Give reasons for non-participation at each stage                                                                                                                                                         | - |
|                          |     | (c) Consider use of a flow diagram                                                                                                                                                                           | - |
| Descriptive data         | 14* | (a) Give characteristics of study participants (eg demographic, clinical, social) and information on exposures and potential confounders                                                                     | 7 |
|                          |     | (b) Indicate number of participants with missing data for each variable of interest                                                                                                                          | 8 |
|                          |     | (c) Summarise follow-up time (eg, average and total amount)                                                                                                                                                  | 8 |
| Outcome data             | 15* | Report numbers of outcome events or summary measures over time                                                                                                                                               | 8 |
| Main results             | 16  | (a) Give unadjusted estimates and, if applicable, confounder-adjusted estimates and their precision (eg, 95% confidence interval). Make clear which confounders were adjusted for and why they were included | 8 |
|                          |     | (b) Report category boundaries when continuous variables were categorized                                                                                                                                    | - |
|                          |     | (c) If relevant, consider translating estimates of relative risk into absolute risk for a meaningful time period                                                                                             | - |
| Other analyses           | 17  | Report other analyses done—eg analyses of subgroups and interactions, and sensitivity analyses                                                                                                               | - |
| <b>Discussion</b>        |     |                                                                                                                                                                                                              |   |
| Key results              | 18  | Summarise key results with reference to study objectives                                                                                                                                                     | 8 |
| <b>Limitations</b>       | 19  | Discuss limitations of the study, taking into account sources of potential bias or imprecision.                                                                                                              | 5 |
| Interpretation           | 20  | Give a cautious overall interpretation of results considering objectives, limitations, multiplicity of analyses, results from similar studies, and other relevant evidence                                   | 8 |
| Generalisability         | 21  | Discuss the generalisability (external validity) of the study results                                                                                                                                        | 9 |
| <b>Other information</b> |     |                                                                                                                                                                                                              |   |
| Funding                  | 22  | Give the source of funding and the role of the funders for the present study and, if applicable, for the original study on which the present article is based                                                | 3 |

\*Give information separately for cases and controls in case-control studies and, if applicable, for exposed and unexposed groups in cohort and cross-sectional studies.

**Note:** An Explanation and Elaboration article discusses each checklist item and gives methodological background and published examples of transparent reporting. The STROBE checklist is best used in conjunction with this article (freely available on the Web sites of PLoS Medicine at <http://www.plosmedicine.org/>, Annals of Internal Medicine at <http://www.annals.org/>, and Epidemiology at <http://www.epidem.com/>). Information on the STROBE Initiative is available at [www.strobe-statement.org](http://www.strobe-statement.org).



# BMJ Open

## Hospitals and patients Working in Unity (HOW R U?): telephone peer support to improve older patients' quality of life after emergency department discharge in Melbourne, Australia – a multicentre prospective feasibility study

|                                 |                                                                                                                                                                                                                                                                                                                                                                                                                                                                                                                                                                                                                                                                                                                                                                                                                                                                    |
|---------------------------------|--------------------------------------------------------------------------------------------------------------------------------------------------------------------------------------------------------------------------------------------------------------------------------------------------------------------------------------------------------------------------------------------------------------------------------------------------------------------------------------------------------------------------------------------------------------------------------------------------------------------------------------------------------------------------------------------------------------------------------------------------------------------------------------------------------------------------------------------------------------------|
| Journal:                        | <i>BMJ Open</i>                                                                                                                                                                                                                                                                                                                                                                                                                                                                                                                                                                                                                                                                                                                                                                                                                                                    |
| Manuscript ID                   | bmjopen-2017-020321.R2                                                                                                                                                                                                                                                                                                                                                                                                                                                                                                                                                                                                                                                                                                                                                                                                                                             |
| Article Type:                   | Research                                                                                                                                                                                                                                                                                                                                                                                                                                                                                                                                                                                                                                                                                                                                                                                                                                                           |
| Date Submitted by the Author:   | 04-May-2018                                                                                                                                                                                                                                                                                                                                                                                                                                                                                                                                                                                                                                                                                                                                                                                                                                                        |
| Complete List of Authors:       | Lowthian, Judy; Monash University, School of Public Health & Preventive Medicine; Bolton Clarke, Research Institute<br>Lennox, Alyse; Monash University, School of Public Health & Preventive Medicine<br>Curtis, Andrea; Monash University, School of Public Health & Preventive Medicine<br>Wilson, Gillian; Alfred Health, Volunteer Services<br>Rosewarne, Cate; Cabrini Hospital, Volunteer Services<br>Smit, De Villiers; Alfred Health, Emergency & Trauma Centre<br>O'Brien, Debra; Epworth, Medical Services<br>Browning, Colette; Australian National University<br>Boyd, Lee; Cabrini Hospital, Nursing Services & Cabrini Institute<br>Smith, Cathie; Alfred Health, Emergency & Trauma Centre<br>Cameron, Peter; Monash University, Department of Epidemiology and Preventive Medicine<br>Dale, Jeremy; University of Warwick, Warwick Medical School |
| <b>Primary Subject Heading</b>: | Health services research                                                                                                                                                                                                                                                                                                                                                                                                                                                                                                                                                                                                                                                                                                                                                                                                                                           |
| Secondary Subject Heading:      | Geriatric medicine, Emergency medicine, Patient-centred medicine                                                                                                                                                                                                                                                                                                                                                                                                                                                                                                                                                                                                                                                                                                                                                                                                   |
| Keywords:                       | post-discharge, gerontology, social isolation, volunteer-peer, telephone-support                                                                                                                                                                                                                                                                                                                                                                                                                                                                                                                                                                                                                                                                                                                                                                                   |
|                                 |                                                                                                                                                                                                                                                                                                                                                                                                                                                                                                                                                                                                                                                                                                                                                                                                                                                                    |

SCHOLARONE™  
Manuscripts

## TITLE PAGE

**HOspitals and patients WoRking in Unity (*HOW R U?*): telephone peer support to improve older patients' quality of life after emergency department discharge in Melbourne, Australia – a multicentre prospective feasibility study**

1. **Dr Judy A Lowthian** **Corresponding Author**  
School of Public Health and Preventive Medicine, Monash University  
Level 3, 553 St Kilda Road, Melbourne, 3004, Australia  
[Judy.Lowthian@monash.edu](mailto:Judy.Lowthian@monash.edu)  
T: +61 412 116571  
  
Bolton Clarke Research Institute, Bolton Clarke,  
31 Alma Road, St Kilda, 3182, Australia  
[jlowthian@boltonclarke.com.au](mailto:jlowthian@boltonclarke.com.au)  
T: +61 412 116571
2. Ms Alyse Lennox  
School of Public Health and Preventive Medicine, Monash University  
Level 3, 553 St Kilda Rd, Melbourne, 3004, Australia  
[Alyse.Lennox@monash.edu](mailto:Alyse.Lennox@monash.edu)  
T: +61 3 9903 0320
3. Dr Andrea Curtis  
School of Public Health and Preventive Medicine, Monash University  
Level 6 Alfred Centre, 99 Commercial Road, Melbourne, 3004, Australia  
[Andrea.Curtis@monash.edu](mailto:Andrea.Curtis@monash.edu)  
T: +61 3 9903 0171
4. Mrs Gillian Wilson  
Volunteer Services, Alfred Health,  
55 Commercial Road, Melbourne, 3004, Australia  
[G.Wilson@alfred.org.au](mailto:G.Wilson@alfred.org.au)  
T: +61 3 9076 2970
5. Mrs Cate Rosewarne  
Volunteer Services, Cabrini Health,  
183 Wattletree Road, Malvern, Australia  
[crosewarne@cabrini.com.au](mailto:crosewarne@cabrini.com.au)  
T: +61 3 9508 3470

## Manuscript ID bmjopen-2017-020321.R2

- 1  
2  
3 6. Dr De Villiers Smit  
4 Emergency and Trauma Centre, Alfred Health,  
5 55 Commercial Road, Melbourne, 3004, Australia  
6 Melbourne, Australia  
7 [d.smit@alfred.org.au](mailto:d.smit@alfred.org.au)  
8 T: +61 3 9076 2782  
9  
10
- 11 7. Dr Debra O'Brien  
12 Epworth Hospital,  
13 89 Bridge Road, Richmond, Australia  
14 [debra.obrien@epworth.org.au](mailto:debra.obrien@epworth.org.au)  
15 T: +61 3 9426 6666  
16  
17
- 18 8. Professor Colette Browning  
19 Shenzhen International Institute for Primary Health Care Research, Shenzhen, China  
20 Australian National University, Canberra Australia  
21 Monash University, Wellington Road, Melbourne, Australia  
22 [colette.browning@monash.edu](mailto:colette.browning@monash.edu)  
23 T: +61 448 708 090  
24  
25
- 26 9. Associate Professor Lee Boyd  
27 Nursing Services and Cabrini Institute, Cabrini Health,  
28 154 Wattletree Road, Malvern, Australia  
29 [lboyd@cabrini.com.au](mailto:lboyd@cabrini.com.au)  
30 T: +61 3 9508 3470  
31  
32
- 33 10. Ms Cathie Smith  
34 Senior Social Worker/ ED Allied Health Team Leader, Patient + Family Services  
35 Alfred Health,  
36 55 Commercial Road, Melbourne, Australia  
37 [Cathie.Smith@alfred.org.au](mailto:Cathie.Smith@alfred.org.au)  
38 T: +61 3 9076 3405  
39  
40
- 41 11. Professor Peter Cameron  
42 School of Public Health and Preventive Medicine, Monash University  
43 Level 3, 553 St Kilda Rd, Melbourne, 3004, Australia  
44  
45 Emergency and Trauma Centre, Alfred Health,  
46 55 Commercial Road, Melbourne, Australia  
47 [Peter.Cameron@monash.edu](mailto:Peter.Cameron@monash.edu)  
48 T: +61 455 753 792  
49  
50  
51  
52  
53  
54  
55  
56  
57  
58  
59  
60

1  
2  
3  
4 12. Professor Jeremy Dale  
5 Warwick Medical School, University of Warwick,  
6 Coventry, CV4 7AL, United Kingdom  
7 [Jeremy.Dale@warwick.ac.uk](mailto:Jeremy.Dale@warwick.ac.uk)  
8  
9 T: 024 7652 2891  
10  
11  
12  
13

#### 14 **Keywords**

- 16 • gerontology
- 17 • social isolation
- 18 • volunteer-peer
- 19 • telephone-support
- 20
- 21
- 22

#### 23 **Author Contributions:**

24 JL conceived, developed the study protocol, and obtained funding for the study. JD and CB  
25 provided expertise to help design of the intervention. JL, AL, AC, GW, CR, DS, DO, LB, CS, PC,  
26 JD and CB contributed to refinement of the study protocol. JL, AL, AC, GW, CR, DS, DO, LB,  
27 CS, PC, JD and CB contributed to the acquisition, analysis, or interpretation of data. JL  
28 drafted the manuscript. JL, AL, AC, GW, CR, DS, DO, LB, CS, PC, JD and CB helped review and  
29 revise it critically for intellectual content, and approved the final version to be published. JL,  
30 AL, AC, GW, CR, DS, DO, LB, CS, PC, JD and CB agree to be accountable for all aspects of the  
31 work in ensuring that questions related to the accuracy or integrity of any part of the work  
32 are appropriately investigated and resolved.  
33  
34

35 **Funding:** This work was supported by a grant from the Monash Partners Academic Health  
36 Science Centre.  
37

38 **Competing interests:** None declared.  
39

40 **Patient consent:** Obtained.  
41

42 **Ethics approval:** Alfred Health (432/15), Cabrini Health (12-09-11-15) and Monash  
43 University (CF15/4468-2015001934)  
44  
45

46 **Provenance and peer review:** Not commissioned; externally peer reviewed.  
47

48 **Data sharing Statement:** There are no additional unpublished data for this study.  
49  
50

51 **Word Count:** 1938 words  
52  
53  
54  
55  
56  
57  
58  
59  
60

Manuscript ID bmjopen-2017-020321.R2

1  
2  
3 **HOspitals and patients WoRking in Unity (*HOW R U?*): telephone peer support to improve**  
4 **older patients' quality of life after emergency department discharge in Melbourne,**  
5 **Australia – a multicentre prospective feasibility study**  
6

7 **ABSTRACT**  
8

9  
10 **Objectives:** To ascertain the feasibility and acceptability of the *HOW R U?* program, a novel  
11 volunteer-peer post-discharge support program for older patients after discharge from the  
12 emergency department (ED).  
13

14  
15 **Design:** A multicentre prospective mixed methods feasibility study.  
16

17 **Setting:** Two tertiary hospital EDs in metropolitan Melbourne, Australia.  
18

19 **Participants:** A convenience sample of 39 discharged ED patients aged 70 years or over, with  
20 symptoms of social isolation, loneliness and/or depression.  
21

22 **Intervention:** The *HOW R U?* intervention comprised weekly social support telephone calls  
23 delivered by volunteer peers for 3 months following ED discharge.  
24  
25

26 **Primary and secondary outcome measures:** The primary outcomes were feasibility of study  
27 processes, intervention acceptability to participants, and retention in the program.  
28 Secondary outcomes were changes in loneliness level (UCLA-3 item Loneliness Scale), mood  
29 (GDS-5 item) and health-related quality of life (EQ-5D-5L and EQ-VAS) post-intervention.  
30  
31

32 **Results:** Recruitment was feasible, with 30% of eligible patients successfully recruited.  
33 Seventeen volunteer peers provided telephone support to patient participants, in addition  
34 to their usual hospital volunteer role. *HOW R U?* was well received, with 87% retention in  
35 the patient group, and no attrition in the volunteer group.  
36  
37

38  
39 The median age of patients was 84 years, 64% were female, and 82% lived alone. Sixty-eight  
40 percent of patients experienced reductions in depressive symptoms, and 53% experiencing  
41 reduced feelings of loneliness, and these differences were statistically significant. Patient  
42 feedback was positive and volunteers reported great satisfaction with their new role.  
43  
44

45 **Conclusion:** *HOW R U?* was feasible in terms of recruitment and retention and was  
46 acceptable to both patients and volunteers. The overall results support the potential for  
47 further research in this area, and provide data to support the design of a definitive trial to  
48 confirm the observed effects.  
49  
50

51 **Trial registration:** <http://www.anzctr.org.au> ACTRN12615000715572  
52  
53  
54  
55  
56  
57  
58  
59  
60

### Strengths and limitations of this study

- This is the first feasibility study of a hospital volunteer-delivered telephone service to support older people with symptoms of social isolation, loneliness and/or depression after discharge from the emergency department.
- Recruitment and retention rates support the feasibility of the intervention.
- Reductions in loneliness and depressive symptoms support further research to test the intervention in a definitive trial.
- This was a relatively small cohort study, hence a randomised controlled trial is required to confirm the observed effects.

## INTRODUCTION

Older people presenting to Emergency Departments (EDs) and hospitals have a higher likelihood of social isolation, loneliness and depression<sup>1-3</sup>; all of which are associated with negative health outcomes, functional decline, institutionalisation, mortality and increased hospital use.<sup>4-9</sup>

These risk factors for increased hospital use and poor health outcomes are not routinely screened for during ED attendances or short hospital admissions other than in the research setting. Despite this, ED attendances represent an opportunity to identify older patients who are at risk of further negative health outcomes and increased acute health service use. Targeted management of older people suffering from social isolation, loneliness or depressive symptoms has been shown to be effective in reducing symptoms.<sup>5</sup> It is highly probable that systematic identification of isolation, loneliness and depressive symptoms at the time of ED attendance, with post-discharge support, will help combat these negative consequences and diminish this important public and individual health burden.

Peer support is the *'provision of knowledge, experience, emotional or practical help by someone sharing common characteristics'*.<sup>10</sup> Peer support can be used with patients transitioning from hospital to home to enhance quality of life. This definition falls within the social support model, and postulates that social relationships promote health and well-being; thus peer support is hypothesised to reduce feelings of social isolation and loneliness, thereby improving well-being.<sup>11</sup>

Peer support is provided by a person sharing common characteristics (e.g. age, gender, socio-economic status, ethnicity, or experience of acute illness and hospitalisation). Equivalent 'status' between peer and patient is a feature of peer support that facilitates a high level of empathy delivered in a non-confrontational manner<sup>12</sup>. Peers may be hospital volunteers who are trained to support and listen, but not to give medical advice or

1  
2  
3 judgement. This non-medical status helps overcome any reluctance that patients may have  
4 in discussing feelings of loneliness or isolation; thus helping to bridge the gap between  
5 patients and health professionals<sup>10 13</sup>. Peer support can be delivered via home visits, group  
6 meetings or telephone calls.  
7

8  
9 The aim of this study was to test the feasibility and acceptability of *HOspitals and patients*  
10 *WoRking in Unity (HOW R U?)*, a post-discharge, telephone peer support intervention  
11 delivered by hospital volunteers to older community-dwelling patients with feelings of social  
12 isolation, loneliness, or depression. If the intervention is feasible and acceptable, the  
13 findings will inform design and conduct of a randomised controlled trial and program  
14 evaluation.  
15

## 16 17 **METHODS**

### 18 19 **Patient and Public Involvement statement**

20  
21 This study was informed by comments received from patient participants in the Safe Elderly  
22 Emergency Discharge (SEED) project. SEED mapped the demographic, clinical, functional and  
23 psychosocial profiles of a large cohort (n=959) of older ED patients. The cohort was followed  
24 up by telephone over a 6 months' period after discharge home, to determine the risk factors  
25 associated with adverse outcomes.<sup>8 9</sup> Many patients reported how much they looked  
26 forward to the follow-up calls, with requests for more frequent calls; highlighting their  
27 feelings of isolation and loneliness. This led to development of our hypothesis that  
28 telephone support could reduce feelings of social isolation, loneliness and depression.  
29 Potential patients and hospital-based volunteers were involved in the development of the  
30 *HOW R U?* intervention; with volunteers directly involved as research partners in all aspects  
31 of the study (GW, CR). Hospital-based volunteers were involved in conduct of this study,  
32 including development and publication of the study protocol and this manuscript.<sup>14</sup> Patients  
33 from the current feasibility and acceptability study have been involved in refinement of  
34 study processes and of the intervention for the planned RCT.  
35  
36  
37  
38  
39

### 40 41 **Design, setting and participants**

42 This was a pragmatic prospective mixed methods feasibility study conducted with a cohort  
43 of patients following discharge home from the EDs of two tertiary hospitals. The Alfred and  
44 Cabrini Hospitals provide public and private healthcare in metropolitan Melbourne,  
45 respectively. Participants were community-dwelling patients aged 70 years or more, who  
46 attended The Alfred ED between November 2015 and March 2016; and Cabrini ED between  
47 March and July 2016; and were discharged home from the ED, short-stay observation unit  
48 or acute medical ward within 72 hours of arrival. Patients were recruited on weekdays  
49 throughout the study period by research nurses. All participants gave written informed  
50 consent. The study was registered at <http://www.anzctr.org.au>, registry number  
51 ACTRN12615000715572.  
52  
53  
54  
55  
56  
57  
58  
59  
60

1  
2  
3 Eligible patients had symptoms of social isolation, loneliness and/or depression using the  
4 Social Isolation Index (SII $\geq$ 3),<sup>15</sup> 3-item Loneliness Scale (UCLA-3 $\geq$ 6),<sup>16</sup> and Geriatric  
5 Depression Scale – 5 item (GDS-5 $\geq$ 2).<sup>17</sup>  
6

7 Patients were excluded if they were triaged as category 1 level of urgency on the  
8 Australasian Triage Scale; required surgery; lived in an aged care facility; were receiving end-  
9 of-life care; had a confirmed diagnosis of dementia or severe mental illness such as  
10 psychosis or schizophrenia; had a moderate-severe cognitive impairment using the Mini-  
11 Mental State Examination (MMSE $<$ 20);<sup>18</sup> or were unable or unwilling to communicate by  
12 telephone.  
13  
14  
15

### 16 **Sample size**

17  
18 A sample size of 50 participants across the two sites was nominated, to examine feasibility  
19 of study processes and intervention acceptability.  
20

### 21 **HOW R U? intervention**

22  
23 The intervention, volunteer peer training program and risk management strategies were  
24 described in full in the published study protocol.<sup>14</sup> In summary, *HOW R U?* comprised:  
25

- 26 • screening by research nurses for feelings of social isolation, loneliness and  
27 depression at the time of hospital attendance using the SII<sup>15</sup>, UCLA-3<sup>16</sup> and GDS-5<sup>17</sup>;
- 28 • peer support delivered by a trained hospital volunteer through weekly telephone  
29 calls, within 72 hours of discharge home, for up to 3 months; and
- 30 • referral for ongoing support by community-based services as required at study end.  
31  
32

### 33 **Data collection**

34  
35 As per the published study protocol paper,<sup>14</sup> bio-sociodemographic and health and social  
36 care services use data were collected, alongside measurement of social isolation (SII)<sup>15</sup>,  
37 loneliness (UCLA-3)<sup>16</sup>, depressive symptoms (GDS-5)<sup>17</sup>, and health-related quality of life  
38 (EQ-5D-5L and EQ VAS)<sup>19</sup> at the time of hospital attendance and at the 3 months study end  
39 point. The primary outcomes were feasibility and acceptability.  
40  
41  
42

43 Feasibility of study processes including recruitment and retention in the program were  
44 assessed using study records. Thirty-nine patient experience interviews were conducted at  
45 the conclusion of follow-up data collection to determine the acceptability of the  
46 intervention. These interviews were undertaken using a topic guide based on the Peer  
47 Support Evaluation Inventory<sup>20</sup>. Questions explored participants' perceptions about the  
48 frequency and length of the calls, the modality of the intervention, their matched volunteer  
49 peers, the level of support provided, and their satisfaction with the overall experience (See  
50 Appendix). Fidelity of the intervention delivery was determined by reviewing the weekly  
51 telephone activity logs maintained by the volunteer peers, and also through observation of  
52 a proportion of peer support calls. Secondary outcomes were any measurable changes in  
53 levels of perceived social isolation, loneliness, depressive symptoms and quality of life.  
54  
55  
56  
57  
58



## Analysis

Acceptability of the intervention by the target patient population was measured by the rate of recruitment and retention in the intervention, and also through analysis of the qualitative interviews. Transcripts were loaded into NVivo (Version 11, QSR International, Doncaster, Victoria) for data management and analysed using a qualitative thematic framework approach<sup>21</sup>. This involved familiarisation with the data and derivation of a framework by noticing concepts within the data and developing themes and sub-themes. Quotes were sorted into categories, which formed the final thematic framework. Data were mapped and interpreted and the framework was applied back to the dataset to ensure all quotes were appropriately organised whilst retaining links to the original data. Two researchers were involved in the development of the framework and resolved differences in opinion through discussion.

Acceptability to volunteer peers was measured using retention rates and feedback obtained in focus groups. Volunteer perceptions are the focus of a separate manuscript.

Social isolation, loneliness, depressive symptoms and health-related quality of life scores were compared before and after the intervention, using paired t-tests with a significance level of  $p=0.05$ .

## RESULTS

This study enabled us to develop all study resources, materials and training programs; test the feasibility of study processes; and determine acceptability of the intervention to patients and volunteers. We recruited 17 volunteer peers and a convenience sample of 39 patient participants. Volunteers were all aged over 50 years and 69% were women. The median age of patient participants was 84 years, 64% were women, and 84% of participants lived alone. Patient participant baseline demographic characteristics are summarised in Table 1.

### Feasibility of study processes

Volunteers were invited by their Hospital Volunteer Services Manager to participate in the study. All volunteer participants attended a half-day *HOW R U?* peer support training program, conducted at their respective hospital. Feedback about the first hospital's *HOW R U?* orientation / training program and resources enabled refinement prior to the second hospital's session.

Recruitment processes in the ED, including eligibility screening, were feasible, with 30% of eligible patients successfully enlisted across the two sites.

### Intervention acceptability and fidelity

The intervention was feasible and acceptable from the volunteers' point of view, with most able to take on 3 participants in addition to their usual hospital volunteer roles. There was

1  
2  
3 no volunteer attrition over the study period. The mean number of telephone calls per  
4 participant was 7.73 calls (standard deviation, SD 2.71), with a mean call length of 23.97  
5 minutes (SD 13.39). Weekly monitoring of telephone activity logs indicated intervention  
6 fidelity, with 100% completion rate of the activity log sheets including documentation of the  
7 main focus of and topics discussed in each call; agreed social goals for the following week;  
8 patient-reported changes since the previous call; and volunteer-peer impression of the  
9 participant's emotional state/feelings during each call. All volunteers adhered to the risk  
10 management procedures in accordance with the study protocol, with one volunteer  
11 reporting concern about a single patient participant to the hospital emergency physician  
12 coinvestigator. All volunteers reported that the level of support provided by their Volunteer  
13 Service Manager, and the research team was appropriate.  
14  
15  
16  
17

18 The intervention was acceptable to patient participants, with 34 completing the program,  
19 representing an 87% retention rate. Three main themes were identified in the qualitative  
20 data as follows:  
21

#### 22 *Study processes were acceptable to participants*

23  
24 While some participants missed a few calls due to last-minute medical appointments and  
25 unexpected visitors, the fact that participants agreed upon the call time the week prior  
26 meant that receiving peer support calls was convenient for them. Participants were satisfied  
27 with the individually-determined length of their phone calls, with one expressing that  
28 *'having someone to talk to for 5-10 minutes is good'* (P13) while others were happy to talk  
29 for much longer. Similarly, while some participants would have liked to receive more calls at  
30 the conclusion of the intervention, most participants were satisfied with the length of the  
31 program. Some also commented on the frequency of the calls and believed that *'once a*  
32 *week was a good amount of calls'* (P17). In terms of the modality of the intervention, while  
33 a couple of participants *'would have liked face-to-face'* (P36) support, most *'liked the*  
34 *convenience of telephone support'* (P1). One participant stated that *'telephone calls are a*  
35 *good way to receive social support without having to go out'* (P2). Another participant liked  
36 receiving telephone support because *'even though they knew the voice, the anonymity was*  
37 *good'* (P19).  
38  
39  
40  
41  
42  
43

#### 44 *Supportive relationships developed between participants and volunteer peers*

45 Most participants reported that their volunteer peers were supportive and understanding.  
46 One participant stated that they *'felt they could confide in their volunteer'* (P21), while  
47 another mentioned that they *'could talk about things that they couldn't talk about with*  
48 *other people'* (P35). Participants reported finding common interests with their volunteer  
49 peer in order to build rapport and topics discussed included sport, poetry, films, music,  
50 cooking and politics. Furthermore, some participants reported *'becoming quite good friends'*  
51 (P4) with their volunteer and *'looking forward to the calls'* (P15), demonstrating that it was  
52 feasible for participants to develop a supportive relationship with a volunteer in this  
53 timeframe.  
54  
55  
56  
57  
58  
59  
60

## Manuscript ID bmjopen-2017-020321.R2

*HOW R U? is addressing a need*

A number of participants commented on the potential for *HOW R U?* to fill a need for 'people who are really isolated' (P23). One participant suggested that 'after discharge is when something like this is really helpful, especially if you're on your own' (P5). Another participant mentioned that 'it is empowering to have someone to talk to when you are down and know that you are not alone' (P26). Overall, participants acknowledged that taking an interest in people who may be socially isolated, lonely or showing symptoms of depression can really make a difference.

**Secondary outcomes**

At the end of the 3-months study, it was observed that:

- 53% of participants experienced a reduction in the level of loneliness: pre- and post- mean *UCLA 3-item* scores 5.76 (SD 1.84) and 4.59 (SD 1.62), respectively ( $t=3.32, p=0.002$ );
- 68% of participants experienced fewer depressive symptoms: pre- and post- mean *GDS 5-item* scores 2.15 (SD 1.21) and 1.03 (SD,1.22), respectively ( $t=4.77, p=0.000$ );
- while 59% of participants experienced an increase in health-related quality of life, the difference between mean *EQ VAS* scores pre- and post- intervention was not significant: pre- and post- mean *EQ VAS* scores 57.85 (SD 26.02) and 65.44 (SD=20.13), respectively ( $t=-1.58, p=0.124$ )

**DISCUSSION**

This is the first study of a hospital volunteer-delivered telephone service designed to support discharged older emergency patients with symptoms of social isolation, loneliness and/or depression. This study indicated that *HOW R U?* was feasible and acceptable to patients and volunteers. Our results also suggested that a hospital volunteer-delivered telephone service might reduce levels of loneliness and symptoms of depression in this patient group. A limitation was that this was a relatively small cohort study in two metropolitan hospital EDs; and it was not powered for these secondary outcomes. Hence further research with a comparative controlled trial is required to confirm the observed effects.

The overall 30% recruitment rate was reassuring, given the challenges associated with acute illness or injury and the fast-paced nature of the ED environment;<sup>22</sup> as well as the recognised stigma with seeking or receiving support in older populations.<sup>23</sup> Recruitment sessions were limited to 4.5hour time periods, due to resource constraints for this feasibility study. The target of 25 patients was met at the Alfred, however recruitment was terminated early at Cabrini due to the majority of older patients being admitted for time periods greater than 72 hours.

## Manuscript ID bmjopen-2017-020321.R2

1  
2  
3 The rate of patient retention in *HOW R U?* was promising, possibly in part due to the  
4 targeted cohort's characteristics, the supportive non-intrusive nature of the intervention  
5 which enabled relative anonymity and increased privacy over the phone,<sup>24</sup> and  
6 commencement within 72 hours of discharge.  
7

8  
9 The positive feedback was encouraging, and is in common with that reported by the UK *Call*  
10 *in Time* telephone 'befriending' service for older people. Evaluation of this service indicated  
11 a major impact on quality of life, with participants reporting that they felt a sense of  
12 belonging, that life was worth living and they valued knowing that '*there's a friend out*  
13 *there*'.<sup>25</sup> This resonates with comments received from *HOW R U?* participants.  
14  
15

16 Social isolation, loneliness and depressed mood are prevalent amongst older people living in  
17 the community, with 12% feeling socially isolated;<sup>26</sup> 50% reporting loneliness;<sup>27 28</sup> and  
18 depressive feelings in up to 20%.<sup>29</sup> Self-reported rates probably *under-represent* true levels  
19 because of an associated stigma amongst older people.<sup>29</sup> Therefore older patients with  
20 loneliness or depressive feelings are highly likely not to be identified,<sup>30</sup> reducing the  
21 opportunity for appropriate support to be implemented in the community.  
22  
23

24 Older people presenting to ED are at an increased risk of feeling socially isolated, lonely or  
25 depressed,<sup>31</sup> which are associated with increased re-attendance<sup>32</sup> and negative health  
26 outcomes such as early mortality, suicide, dementia and stroke.<sup>33</sup> These consequences have  
27 far-reaching public health impacts in terms of reduced quality of life and increased hospital  
28 use. Furthermore, with population ageing, it is likely that the number of older people at risk  
29 of social isolation and loneliness will continue to grow, as will their rates of ED use. The ED  
30 visit provides an opportunity to systematically identify social isolation, loneliness or  
31 depressive symptoms. If proven effective, implementation of peer support through *HOW R*  
32 *U?* should help combat the associated deleterious consequences, thereby diminishing this  
33 important public health and individual burden.  
34  
35  
36  
37

38 *HOW R U?* has the potential to reduce symptoms of depression, loneliness and social  
39 isolation amongst vulnerable older people, as well as improve quality of life. Volunteers  
40 represent a significant adjunct resource for meeting some of the health and social care  
41 service needs of our more vulnerable older population. Additional benefits include the  
42 positive effects that the act of meaningful volunteering has on the peer supporter, including  
43 a positive correlation between volunteering and perceived health, and a negative  
44 correlation with depression in older volunteers<sup>34</sup>. Maintenance of an effective high quality  
45 volunteer service requires professional staff to coordinate and manage recruitment, training,  
46 and the provision of day-to-day supervision, support and oversight; however the use of  
47 volunteers in hospitals has been shown to be cost-effective alongside increased levels of  
48 patient satisfaction<sup>35</sup>. Our qualitative and quantitative findings will now inform the design  
49 of a future randomised controlled trial and program evaluation.  
50  
51  
52  
53  
54  
55  
56  
57  
58  
59  
60

## Manuscript ID bmjopen-2017-020321.R2

## REFERENCES

1. Aminzadeh F, Dalziel WB. Older adults in the emergency department: a systematic review of patterns of use, adverse outcomes, and effectiveness of interventions. *Ann Emerg Med* 2002;39(3):238-47.
2. Molloy GJ, McGee HM, O'Neill D, et al. Loneliness and emergency and planned hospitalizations in a community sample of older adults. *J Am Geriatr Soc* 2010;58(8):1538-41
3. Coe RM, Wolinsky FD, Miller DK, et al. Elderly persons without family support networks and use of health services. *Research on aging* 1985;7(4):617-22.
4. Hawton A, Green C, Dickens AP, et al. The impact of social isolation on the health status and health-related quality of life of older people. *Qual Life Res* 2010;20(1):57-67.
5. Dickens AP, Richards SH, Greaves CJ, et al. Interventions targeting social isolation in older people: a systematic review. *BMC Public Health* 2011;11:647.
6. Choi NG, Marti CN, Bruce ML, et al. Relationship between depressive symptom severity and emergency department use among low-income, depressed homebound older adults aged 50 years and older. *BMC Psychiatry*, 2012;12:233.
7. Mistry R, Rosansky J, McGuire J, et al. Social isolation predicts re-hospitalization in a group of older American veterans enrolled in the UPBEAT Program. Unified Psychogeriatric Biopsychosocial Evaluation and Treatment. *Int J Geriatr Psychiatry* 2001;16(10):950-9.
8. Lowthian JA, Straney LD, Brand CA, et al. Unplanned early return to the emergency department by older patients: the Safe Elderly Emergency Department Discharge (SEED) project. *Age and Ageing* 2016;45(2):255-61.
9. Lowthian JA, Straney LD, Brand CA, et al. Predicting functional decline in older discharged emergency patients - the Safe Elderly Emergency Discharge (SEED) project. *Age Ageing* 2017;46(2):219-25.
10. Dale J, Caramlau I, Sturt J, et al. Telephone peer-delivered intervention for diabetes motivation and support: the telecare exploratory RCT. *Patient Educ Couns* 2009;75(1):91-8.
11. Paul G, Smith SM, Whitford D, et al. Development of a complex intervention to test the effectiveness of peer support in type 2 diabetes. *BMC Health Serv Res* 2007;7:136.
12. Dale J, Caramlau IO, Lindenmeyer A, et al. Peer support telephone calls for improving health (Review). *The Cochrane Collaboration* 2009
13. Dale J, Caramlau IO, Lindenmeyer A, et al. Peer support telephone calls for improving health. *Cochrane Database Syst Rev* 2008(4):CD006903.
14. Lowthian JA, Lennox A, Curtis A, et al. HOspitals and patients WoRking in Unity (HOW R U?): protocol for a prospective feasibility study of telephone peer support to improve older patients' quality of life after emergency department discharge. *BMJ Open* 2016;6(12):
15. Steptoe A, Shankar A, Demakakos P, et al. Social isolation, loneliness, and all-cause mortality in older men and women. *Proc Natl Acad Sci U S A* 2013;110(15):5797-801.
16. Hughes ME, Waite LJ, Hawkey LC, et al. A Short Scale for Measuring Loneliness in Large Surveys: Results From Two Population-Based Studies. *Research on aging* 2004;26(6):655-72.
17. Rinaldi P, Mecocci P, Benedetti C, et al. Validation of the five-item geriatric depression scale in elderly subjects in three different settings. *J Am Geriatr Soc* 2003;51(5):694-8.
18. Folstein MF, Folstein SE, McHugh PR. "Mini-Mental State: A Practical Method for Grading the Cognitive State of Patients for the Clinician. *J Psychiatric Research* 1975;12:189-98.
19. EuroQol Group. EuroQol - a new facility for the measurement of health-related quality of life. *Health Policy* 1990;16:199-208.

## Manuscript ID bmjopen-2017-020321.R2

- 1
  - 2
  - 3
  - 4
  - 5
  - 6
  - 7
  - 8
  - 9
  - 10
  - 11
  - 12
  - 13
  - 14
  - 15
  - 16
  - 17
  - 18
  - 19
  - 20
  - 21
  - 22
  - 23
  - 24
  - 25
  - 26
  - 27
  - 28
  - 29
  - 30
  - 31
  - 32
  - 33
  - 34
  - 35
  - 36
  - 37
  - 38
  - 39
  - 40
  - 41
  - 42
  - 43
  - 44
  - 45
  - 46
  - 47
  - 48
  - 49
  - 50
  - 51
  - 52
  - 53
  - 54
  - 55
  - 56
  - 57
  - 58
  - 59
  - 60
20. Dennis CL. The process of developing and implementing a telephone-based peer support program for postpartum depression: evidence from two randomized controlled trials. *Trials* 2014;15(1):131.
21. Ritchie J, Spencer L. Qualitative data analysis for applied policy research. In: Bryman A, R B, eds. *Analyzing qualitative data*. London: Routledge 1994:173-94.
22. Kendrick D, Lyons R, Christie N, et al. Recruiting participants for injury studies in emergency departments. *Injury Prevention* 2007;13(2):75-7.
23. National Ageing Research Institute. *beyondblue depression in older age: a scoping study*. Final Report. In: NARI., ed., 2009.
24. Heisler M, Halasyamani L, Resnicow K, et al. "I am not alone": the feasibility and acceptability of interactive voice response-facilitated telephone peer support among older adults with heart failure. *Congestive heart failure* 2007;13(3):149-57.
25. Cattan M, Kime N, Bagnall AM. Low-level support for socially isolated older people - An evaluation of telephone befriending. In: Age UK, ed. *Call in Time*. London: Help the Aged,, 2009.
26. Windle K, Francis J, Coomber C. Preventing loneliness and social isolation: interventions and outcomes. In: Social Care Institute for Excellence, ed. London, 2011.
27. Office for National Statistics. *Measuring National Well-being - Older people and loneliness, 2013*. In: Office for National Statistics, ed. London, 2013.
28. Franklin A, Tranter B. Loneliness in Australia. In: Housing and Community Research Unit - University of Tasmania, ed., 2008.
29. National Ageing Research Institute. *beyondblue depression in older age: a scoping study*. In: NARI, ed., 2009.
30. Unutzer J, Katon W, Callahan CM, et al. Depression treatment in a sample of 1,801 depressed older adults in primary care. *J Am Geriatr Soc* 2003;51(4):505-14.
31. Lowthian JA, Curtis AJ, Cameron PA, et al. Systematic review of trends in emergency department attendances: an Australian perspective. *Emerg Med J* 2011;28(5):373-7.
32. Rottenberg Y, Jacobs JM, Stessman J. Depression and health service utilization from age 70 to 85: the Jerusalem Longitudinal Study. *J Am Med Dir Assoc* 2013;14(9):711 e1-6.
33. Holt-Lunstad J, Smith TB, Layton JB. Social relationships and mortality risk: a meta-analytic review. *PLoS Med* 2010;7(7):e1000316.
34. Wheeler JA, KM G, Greenblatt B. The beneficial effects of volunteering for older volunteers and ht epeople they serve: a meta-analysis. *Int J Aging and Human Development* 1998;47(1):69-79.
35. Hotchkiss RB, Fottler MD, Unruh L. Valuing volunteers: the impact of volunteerism on hospital performance. *Health Care Manage Review* 2009;34(2):119-28.

Manuscript ID bmjopen-2017-020321.R2

**Table 1: HOW R U? participant baseline demographic characteristics**

|                                                            | N=39        |
|------------------------------------------------------------|-------------|
| Age (years) median (range)                                 | 84 (70-100) |
| Sex                                                        |             |
| Female                                                     | 64%         |
| Cultural background                                        |             |
| Australian born                                            | 77%         |
| Living status                                              |             |
| Living alone                                               | 82%         |
| Formal/informal care in place                              | 44%         |
| Regular social group attendance                            | 53%         |
| Feelings of social isolation ( <sup>*</sup> SII $\geq 2$ ) | 82%         |
| Feelings of loneliness ( <sup>^</sup> UCLA-3 $\geq 6$ )    | 65%         |
| Depressive symptoms ( <sup>#</sup> GDS-5 $\geq 2$ )        | 77%         |
| Self-rated health: EQ-VAS (average)                        | 59.6        |

**Legend**

<sup>\*</sup> SII Social Isolation Index; <sup>^</sup> UCLA-3 3-item Loneliness Scale; <sup>#</sup> GDS-5 Geriatric Depression Scale – 5 item

1  
2  
3  
4  
5  
6  
7  
8  
9  
10  
11  
12  
13  
14  
15  
16  
17  
18  
19  
20  
21  
22  
23  
24  
25  
26  
27  
28  
29  
30  
31  
32  
33  
34  
35  
36  
37  
38  
39  
40  
41  
42  
43  
44  
45  
46  
47  
48  
49  
50  
51  
52  
53  
54  
55  
56  
57  
58  
59  
60

For peer review only



## Appendix 1

### HOW R U? patient experience interview questions

1. Did your volunteer peer provide you with the assistance that you needed? *Why or why not?*
2. Did your volunteer meet your expectations? *Why or why not?*
3. Did you feel that you were well-matched with your volunteer-peer? *Why or why not?*
4. Was receiving support from your volunteer peer convenient for you? *Why or why not?*
5. Was your volunteer supportive and understanding? *Why or why not?*
6. Did your volunteer help you learn more about community resources? *If yes, which community resources?*
7. Did your volunteer peer call you at the planned time? *If no, please explain further*
8. Did you have enough contact with your volunteer? *If no, please explain further*
9. Did you like receiving support from your volunteer peer over the telephone? *Why or why not?*
10. Would you recommend this type of support to a friend? *Why or why not?*
11. Overall, are you satisfied with your volunteer peer experience? *Why or why not?*
12. Do you have any other feedback about your peer support experience?

**STROBE 2007 (v4) Statement—Checklist of items that should be included in reports of cohort studies**

Hospitals and patients Working in Unity (HOWRU?):  
telephone peer support to improve older patients' quality of life after emergency department discharge – a feasibility study

| Section/Topic                | Item # | Recommendation                                                                                                                                                                       | Reported on page # |
|------------------------------|--------|--------------------------------------------------------------------------------------------------------------------------------------------------------------------------------------|--------------------|
| Title and abstract           | 1      | (a) Indicate the study's design with a commonly used term in the title or the abstract                                                                                               | 4                  |
|                              |        | (b) Provide in the abstract an informative and balanced summary of what was done and what was found                                                                                  | 4                  |
| <b>Introduction</b>          |        |                                                                                                                                                                                      |                    |
| Background/rationale         | 2      | Explain the scientific background and rationale for the investigation being reported                                                                                                 | 5                  |
| Objectives                   | 3      | State specific objectives, including any prespecified hypotheses                                                                                                                     | 6                  |
| <b>Methods</b>               |        |                                                                                                                                                                                      |                    |
| Study design                 | 4      | Present key elements of study design early in the paper                                                                                                                              | 6                  |
| Setting                      | 5      | Describe the setting, locations, and relevant dates, including periods of recruitment, exposure, follow-up, and data collection                                                      | 6                  |
| Participants                 | 6      | (a) Give the eligibility criteria, and the sources and methods of selection of participants. Describe methods of follow-up                                                           | 6                  |
|                              |        | (b) For matched studies, give matching criteria and number of exposed and unexposed                                                                                                  | -                  |
| Variables                    | 7      | Clearly define all outcomes, exposures, predictors, potential confounders, and effect modifiers. Give diagnostic criteria, if applicable                                             | 7                  |
| Data sources/<br>measurement | 8*     | For each variable of interest, give sources of data and details of methods of assessment (measurement). Describe comparability of assessment methods if there is more than one group | 6-7                |
| Bias                         | 9      | Describe any efforts to address potential sources of bias                                                                                                                            | -                  |
| Study size                   | 10     | Explain how the study size was arrived at                                                                                                                                            | 6                  |
| Quantitative variables       | 11     | Explain how quantitative variables were handled in the analyses. If applicable, describe which groupings were chosen and why                                                         | 7                  |
| Statistical methods          | 12     | (a) Describe all statistical methods, including those used to control for confounding                                                                                                | 7                  |
|                              |        | (b) Describe any methods used to examine subgroups and interactions                                                                                                                  | -                  |
|                              |        | (c) Explain how missing data were addressed                                                                                                                                          | -                  |
|                              |        | (d) If applicable, explain how loss to follow-up was addressed                                                                                                                       | -                  |
|                              |        | (e) Describe any sensitivity analyses                                                                                                                                                | -                  |

**STROBE 2007 (v4) Statement—Checklist of items that should be included in reports of *cohort studies***

| <b>Results</b>           |     |                                                                                                                                                                                                              |   |
|--------------------------|-----|--------------------------------------------------------------------------------------------------------------------------------------------------------------------------------------------------------------|---|
| Participants             | 13* | (a) Report numbers of individuals at each stage of study—eg numbers potentially eligible, examined for eligibility, confirmed eligible, included in the study, completing follow-up, and analysed            | 7 |
|                          |     | (b) Give reasons for non-participation at each stage                                                                                                                                                         | - |
|                          |     | (c) Consider use of a flow diagram                                                                                                                                                                           | - |
| Descriptive data         | 14* | (a) Give characteristics of study participants (eg demographic, clinical, social) and information on exposures and potential confounders                                                                     | 7 |
|                          |     | (b) Indicate number of participants with missing data for each variable of interest                                                                                                                          | 8 |
|                          |     | (c) Summarise follow-up time (eg, average and total amount)                                                                                                                                                  | 8 |
| Outcome data             | 15* | Report numbers of outcome events or summary measures over time                                                                                                                                               | 8 |
| Main results             | 16  | (a) Give unadjusted estimates and, if applicable, confounder-adjusted estimates and their precision (eg, 95% confidence interval). Make clear which confounders were adjusted for and why they were included | 8 |
|                          |     | (b) Report category boundaries when continuous variables were categorized                                                                                                                                    | - |
|                          |     | (c) If relevant, consider translating estimates of relative risk into absolute risk for a meaningful time period                                                                                             | - |
| Other analyses           | 17  | Report other analyses done—eg analyses of subgroups and interactions, and sensitivity analyses                                                                                                               | - |
| <b>Discussion</b>        |     |                                                                                                                                                                                                              |   |
| Key results              | 18  | Summarise key results with reference to study objectives                                                                                                                                                     | 8 |
| <b>Limitations</b>       | 19  | Discuss limitations of the study, taking into account sources of potential bias or imprecision.                                                                                                              | 5 |
| Interpretation           | 20  | Give a cautious overall interpretation of results considering objectives, limitations, multiplicity of analyses, results from similar studies, and other relevant evidence                                   | 8 |
| Generalisability         | 21  | Discuss the generalisability (external validity) of the study results                                                                                                                                        | 9 |
| <b>Other information</b> |     |                                                                                                                                                                                                              |   |
| Funding                  | 22  | Give the source of funding and the role of the funders for the present study and, if applicable, for the original study on which the present article is based                                                | 3 |

\*Give information separately for cases and controls in case-control studies and, if applicable, for exposed and unexposed groups in cohort and cross-sectional studies.

**Note:** An Explanation and Elaboration article discusses each checklist item and gives methodological background and published examples of transparent reporting. The STROBE checklist is best used in conjunction with this article (freely available on the Web sites of PLoS Medicine at <http://www.plosmedicine.org/>, Annals of Internal Medicine at <http://www.annals.org/>, and Epidemiology at <http://www.epidem.com/>). Information on the STROBE Initiative is available at [www.strobe-statement.org](http://www.strobe-statement.org).
