# Supplementary material for: HOspitals and patients WoRking in Unity (HOW R U?): telephone peer support to improve older patients’ quality of life after emergency department discharge in Melbourne, Australia—a multicentre prospective feasibility study
Source: PubMed Central journal article supplement — BMJ Open. 2018 Jun 14;8(6):e020321. doi: 10.1136/bmjopen-2017-020321 (PMC6009511; doi:10.1136/bmjopen-2017-020321), 2018-06-14
Supplement: bmjopen-2017-020321supp001.pdf [file bmjopen-2017-020321supp001.pdf]

## Appendix 1

### **HOW R U? patient experience interview questions**

1. Did your volunteer peer provide you with the assistance that you needed? *Why or why not?*
2. Did your volunteer meet your expectations? *Why or why not?*
3. Did you feel that you were well-matched with your volunteer-peer? *Why or why not?*
4. Was receiving support from your volunteer peer convenient for you? *Why or why not?*
5. Was your volunteer supportive and understanding? *Why or why not?*
6. Did your volunteer help you learn more about community resources? *If yes, which community resources?*
7. Did your volunteer peer call you at the planned time? *If no, please explain further*
8. Did you have enough contact with your volunteer? *If no, please explain further*
9. Did you like receiving support from your volunteer peer over the telephone? *Why or why not?*
10. Would you recommend this type of support to a friend? *Why or why not?*
11. Overall, are you satisfied with your volunteer peer experience? *Why or why not?*
12. Do you have any other feedback about your peer support experience?
